# Supplementary material for: Reduction in Reactive Oxygen Species Production by Mitochondria From Elderly Subjects With Normal and Impaired Glucose Tolerance
Source: Oxford University Press journal article supplement (doi:10.2337/db11-0121), 2011-06-16
Supplement: db110121supplementarydata2.xls [file db110121supplementarydata2.xls]

## Sheet: Paired 20100122T195017_Quantita
Supplemental Table S1. List of all proteins assigned in at least one individual.
NSAF values and individual spectrum counts for individual subjects are given and coded by subject ID number and group, where O = older, OE = older (Post-exercise), and Y = younger.
IPI ID	Gene/ Gene Name	# Amino acid	Sequence coverage (%)	IsoElectric Point	# Unique Peptides	NSAF in O1	NSAF in OE1	NSAF O2	NSAF in OE2	NSAF in Y2	NSAF in OE3	NSAF in O3	NSAF in Y3	NSAF in O4	NSAF in OE4	NSAF in Y4	NSAF in O5	NSAF in OE5	NSAF in Y5	NSAF in OE6	NSAF in Y6	NSAF in O6	NSAF in O7	NSAF in OE7	NSAF in Y7	NSAF in O8	NSAF in OE8	NSAF in Y8	Spectrum Count in O1	Spectrum Count in OE1	Spectrum Count in O2	Spectrum Count in OE2	Spectrum Count in Y2	Spectrum Count in OE3	Spectrum Count in O3	Spectrum Count in Y3	Spectrum Count in O4	Spectrum Count in OE4	Spectrum Count in Y4	Spectrum Count in O5	Spectrum Count in OE5	Spectrum Count in Y5	Spectrum Count in OE6	Spectrum Count in Y6	Spectrum Count in O6	Spectrum Count in O7	Spectrum Count in OE7	Spectrum Count in Y7	Spectrum Count in O8
IPI00303568,	PTGES2 Prostaglandin E synthase 2	377	0.464191	9.50512	12	0.000268936	0.000339982	0.00170904	0.00212733	0.00193063	0.00204018	0.00137144	0.00186223	0.00112454	0.00148372	0.00126061	0.00103846	0.00145095	0.00102162	0.0010398	0.00121768	0.000904918	0.000725683	0.00107286	0.000777515	0.000954473	0.00121306	0.000866222	5	6	27	35	32	32	21	31	26	36	31	25	37	27	26	33	22	17	23	18	21
IPI00452731,	NDUFA7 NADH dehydrogenase [ubiquinone] 1 alpha subcomplex subunit 7	113	0.743363	10.8001	14	0.00215339	0.00321378	0.0040124	0.00628625	0.00503214	0.00446684	0.00305033	0.00581208	0.0017316	0.00288757	0.00217072	0.00485042	0.00562577	0.00542821	0.00333565	0.0059091	0.0027446	0.00370283	0.00529123	0.00461157	0.00288112	0.0051367	0.00353217	12	17	19	31	25	21	14	29	12	21	16	35	43	43	25	48	20	26	34	32	19
IPI00025086,	COX5A Cytochrome c oxidase subunit 5A, mitochondrial	150	0.58	6.7774	12	0.00405555	0.00640866	0.00365902	0.00549946	0.00348761	0.00592885	0.00459584	0.00845491	0.00402211	0.00466137	0.004497	0.00240119	0.00325248	0.00389905	0.00452314	0.0051007	0.00237774	0.00311133	0.00422053	0.00412544	0.00365548	0.00457322	0.00423326	30	45	23	36	23	37	28	56	37	45	44	23	33	41	45	55	23	29	36	38	32
IPI00216308,	VDAC1 Voltage-dependent anion-selective channel protein 1	283	0.734982	8.88608	19	0.0133274	0.0105679	0.03297	0.0288252	0.0266031	0.0215728	0.0234026	0.0218468	0.021722	0.0204793	0.017335	0.0192567	0.0178662	0.0195574	0.0183802	0.0200063	0.0210961	0.0169461	0.0155349	0.015479	0.0175589	0.0163462	0.021989	186	140	391	356	331	254	269	273	377	373	320	348	342	388	345	407	385	298	250	269	290
IPI00022793,	HADHB Trifunctional enzyme subunit beta, mitochondrial	474	0.561181	9.94059	31	0.00701593	0.00554335	0.00770268	0.00754145	0.00652608	0.00654141	0.00836267	0.00678457	0.00818734	0.00731003	0.00934718	0.00911844	0.00785985	0.00902837	0.00747495	0.00581093	0.00811337	0.00729961	0.00634415	0.00704293	0.00712154	0.00627129	0.00681302	164	123	153	156	136	129	161	142	238	223	289	276	252	300	235	198	248	215	171	205	197
IPI00298933,	CASQ2 Calsequestrin-2	399	0.380952	3.96641	13	0.00345586	0.00208803	0.00137557	0.00132088	0.000912092	0.00150601	0.00228311	0.00153251	0.00196161	0.00112932	0.00295855	0.00372855	0.0020379	0.00218084	0.00192715	0.00156891	0.00240961	0.00310568	0.00224778	0.00273451	0.00214725	0.00171926	0.00177333	68	39	23	23	16	25	37	27	48	29	77	95	55	61	51	45	62	77	51	67	50
IPI00027350,IPI00909207,	PRDX2 Peroxiredoxin-2	190.5	0.346994	7.42559	10	0.00936715	0.00695252	0.00288112	0.00264628	0.00441772	0.00264962	0.00568664	0.00309094	0.00368059	0.00154971	0.00362142	0.00460344	0.0024834	0.00232131	0.00182033	0.00109535	0.00293046	0.00261882	0.00203088	0.00188064	0.00557677	0.00276997	0.00171426	88	62	23	22	37	21	44	26	43	19	45	56	32	31	23	15	36	31	22	22	62
IPI00419266,	NDUFA6 NADH dehydrogenase (ubiquinone) 1 alpha subcomplex, 6, 14kDa	154	0.396104	10.8208	6	0.000921716	0.00138715	0.00201443	0.00386866	0.00354472	0.00265331	0.00207836	0.00338236	0.000847058	0.00110985	0.000796399	0.00284726	0.00336	0.00314938	0.0028392	0.00252928	0.00110764	0.00114951	0.00159869	0.00169191	0.00122393	0.00159903	0.000824661	7	10	13	26	24	17	13	23	8	11	8	28	35	34	29	28	11	11	14	16	11
IPI00025344,	NDUFS6 NADH dehydrogenase [ubiquinone] iron-sulfur protein 6, mitochondrial	124	0.443548	8.38075	8	0.000490591	0.000689103	0.000577335	0.00166314	0.000917149	0.00135686	0	0	0.000657495	0.000751834	0.000370903	0.0012629	0.00154994	0.00149551	0.00158067	0.00347775	0.00112551	0.00116805	0.00241092	0.00196991	0.00110549	0.00184404	0.00160942	3	4	3	9	5	7	0	0	5	6	3	10	13	13	13	31	9	9	17	15	8
IPI00010796,	P4HB Protein disulfide-isomerase	508	0.555118	4.49022	24	0.00115759	0.000294361	0.00117437	0	8.95484e-05	0.000141944	0.000678519	0	0.000385178	0.000122346	0.000452677	0.000369919	0.000145512	5.61608e-05	0.000385832	0.000438142	0.000732614	0.000126717	0.000103852	0.000416732	3.37305e-05	3.46246e-05	0.000499991	29	7	25	0	2	3	14	0	12	4	15	12	5	2	13	16	24	4	3	13	1
IPI00021785,	COX5B Cytochrome c oxidase subunit 5B, mitochondrial	129	0.511628	9.00421	9	0.00314384	0.00513355	0.00314476	0.00390788	0.00229216	0.00428547	0.00286285	0.00421341	0.00176963	0.00264987	0.00285222	0.00279208	0.00401116	0.00453378	0.00409069	0.00409782	0.00228398	0.00299406	0.00272644	0.00252475	0.00252377	0.00313608	0.00295344	20	31	17	22	13	23	15	24	14	22	24	23	35	41	35	38	19	24	20	20	19
IPI00219383,	NDUFB3 NADH dehydrogenase [ubiquinone] 1 beta subcomplex subunit 3	98	0.295918	9.73203	4	0	0	0.000243502	0.000701461	0.000232095	0.000735792	0	0.000231093	0	0.0003171	0.000156435	0.000159795	0.000452572	0.000582238	0.000615393	0.00141949	0.00031647	0.00032843	0.000538333	0.000498509	0	0.000358966	0.000555384	0	0	1	3	1	3	0	1	0	2	1	1	3	4	4	10	2	2	3	3	0
IPI00220416,	UQCRB Cytochrome b-c1 complex subunit 7	111	0.54955	9.23487	10	0.00401902	0.00846789	0.00537459	0.00660595	0.00573755	0.0060631	0.00377071	0.00795708	0.00426009	0.0051793	0.00497211	0.00112864	0.00306335	0.0032128	0.00366741	0.00451168	0.00307346	0.00318962	0.00396071	0.00396112	0.00262429	0.00459541	0.00392271	22	44	25	32	28	28	17	39	29	37	36	8	23	25	27	36	22	22	25	27	17
IPI00177817,	ATP2A1 Isoform SERCA1A of Sarcoplasmic/endoplasmic reticulum calcium ATPase 1; ATP2A1 Isoform SERCA1B of Sarcoplasmic/endoplasmic reticulum calcium ATPase 1; ATP2A2 Isoform SERCA2A of Sarcoplasmic/endoplasmic reticulum calcium ATPase 2	997	0.391174	5.02043	41	0.00705756	0.00257118	0.0052657	0.00312574	0.00157415	0.00397785	0.00713675	0.00433861	0.00389247	0.00268056	0.00453616	0.00227752	0.00160148	0.00356263	0.00375038	0.00301382	0.00780794	0.00635975	0.0052739	0.00519409	0.00390136	0.00416357	0.00456748	347	120	220	136	69	165	289	191	238	172	295	145	108	249	248	216	502	394	299	318	227
IPI00215983,	CA1 Carbonic anhydrase 1	261	0.701149	7.1357	13	0.00388463	0.0032739	0.00310862	0.00228266	0.00479307	0.00313111	0.00396193	0.00373113	0.00299878	0.00101205	0.0027607	0.00515997	0.00237904	0.00196756	0.0020796	0.000799483	0.00273303	0.00234306	0.00195395	0.00162222	0.00433301	0.00195437	0.00173779	50	40	34	26	55	34	42	43	48	17	47	86	42	36	36	15	46	38	29	26	66
IPI00216070,	MYL1 Myosin light chain 1, skeletal muscle isoform; MYL3 Myosin light chain 3	194	0.768041	4.68454	23	0.0274899	0.0340253	0.0115626	0.0209064	0.00914501	0.0380361	0.0291893	0.0289509	0.0145408	0.0254693	0.0147775	0.0064577	0.0192802	0.0144854	0.0282113	0.0195758	0.0231006	0.018084	0.0193079	0.019978	0.0116589	0.023664	0.0219768	263	309	94	177	78	307	230	248	173	318	187	80	253	197	363	273	289	218	213	238	132
IPI00465436,	CAT Catalase	527	0.444023	7.41288	19	0.00084651	0.000526961	0.000498093	0.000173923	0.000906359	0.000592915	0.00121468	0.000386762	0.000742583	5.89674e-05	0.000959985	0.00124804	0.000561063	0.000378952	0.000286093	0.000184776	0.000853327	0.000366446	0.00040043	0.000309006	0.00100795	0.000433892	0.000309835	22	13	11	4	21	13	26	9	24	2	33	42	20	14	10	7	29	12	12	10	31
IPI00029558,	NDUFC2 NADH dehydrogenase [ubiquinone] 1 subunit C2	119	0.529412	9.26617	10	0	0	0.000802124	0.00211814	0.00114682	0.00242378	0.000620686	0.00247405	0.00137024	0.00156685	0.00115946	0.00289511	0.00372706	0.00359618	0.00190048	0.00268868	0.00143342	0.0014876	0.00266	0.00232637	0.00129593	0.00280838	0.00137213	0	0	4	11	6	12	3	13	10	12	9	22	30	30	15	23	11	11	18	17	9
IPI00020035,	NIPSNAP3B Protein NipSnap homolog 3B	247	0.530364	9.68316	11	0	0	0.00202885	0.00139156	0	0.00155698	0.00179421	0.00220053	0.00178242	0.00169848	0.00204823	0.00221902	0.00155621	0.00150156	0.00109874	0.001408	0.00125563	0.0022804	0.00220709	0.00224161	0.00173432	0.00128181	0.000881419	0	0	21	15	0	16	18	24	27	27	33	35	26	26	18	25	20	35	31	34	25
IPI00031641,	TMEM38A Trimeric intracellular cation channel type A	299	0.254181	8.40527	5	0.000271274	0.000142891	0.0015962	0	0	0	0.000576401	0	0.000545347	0	0.000820371	0.000890363	0.000445003	0.000858752	0.000352976	0	0.000518629	0	0.000411702	0.000381245	0	0.000294136	0.000546096	4	2	20	0	0	0	7	0	10	0	16	17	9	18	7	0	10	0	7	7	0
IPI00243742,	MYL3 Myosin light chain 3	195	0.733333	4.7455	19	0.0494985	0.0621147	0.0129718	0.0236195	0.0169132	0.0313083	0.0268932	0.0310091	0.025086	0.04255	0.0223278	0.00730796	0.0179683	0.0163863	0.0354892	0.0256105	0.037853	0.0375505	0.0398606	0.0309825	0.0221438	0.0386063	0.03368	476	567	106	201	145	254	213	267	300	534	284	91	237	224	459	359	476	455	442	371	252
IPI00004845,IPI00871176,	NIPSNAP3A Protein NipSnap homolog 3A; NIPSNAP3B Protein NipSnap homolog 3B	265	0.299495	9.72209	6	0	0	0	0.000345878	0.000429156	0.000362806	0	0	0.000676848	0.000703603	0.000462813	0.000354564	0.000557887	0	0.000284474	0.000262472	0.000117034	0.000242915	0.000398163	0.000245806	0.000258643	0.000331874	0.000342312	0	0	0	4	5	4	0	0	11	12	8	6	10	0	5	5	2	4	6	4	4
IPI00654755,	HBB Hemoglobin subunit beta	147	0.673469	7.323	11	0.0486942	0.0504264	0.0514601	0.0388142	0.0601899	0.0600079	0.0597928	0.0602381	0.0383798	0.0255794	0.038796	0.0807498	0.04928	0.0505577	0.0402057	0.0192104	0.041563	0.0390832	0.0263185	0.0259224	0.062712	0.0356573	0.0293736	353	347	317	249	389	367	357	391	346	242	372	758	490	521	392	203	394	357	220	234	538
IPI00218414,	CA2 Carbonic anhydrase 2	260	0.396154	7.4657	8	0.000701922	0.000410811	0.0010096	0.000176265	0.00113726	0.0010169	0.00123103	0.00104525	0.000752579	0	0.000648605	0.00186714	0.000625477	0.000438918	0.000405922	0.000107008	0.000715708	0.000309482	0.00020291	0.000313166	0.00177941	0.000473558	0.000279116	9	5	11	2	13	11	13	12	12	0	11	31	11	8	7	2	12	5	3	5	27
IPI00216798,	MYL2 Myosin regulatory light chain 2, ventricular/cardiac muscle isoform	166	0.909639	4.62758	19	0.0472741	0.0532768	0.0254445	0.0524546	0.0272669	0.0500989	0.0416769	0.039837	0.0396842	0.0464265	0.0324161	0.00811297	0.016209	0.0148664	0.0576745	0.0387162	0.0603465	0.048764	0.0619732	0.0522874	0.035612	0.0738539	0.0606573	387	414	177	380	199	346	281	292	404	496	351	86	182	173	635	462	646	503	585	533	345
IPI00294186,	LACTB Isoform 1 of Serine beta-lactamase-like protein LACTB, mitochondrial	547	0.28702	8.74923	12	0	0	0.000523507	0.000544583	0.000249491	0	0	0	0.000178858	0.000312462	0.000224215	0.000200401	0.000459466	0.000443331	0.000468576	0.000762944	0.000255143	0.000117682	0.000192894	0.000565645	6.26511e-05	0	0.000398008	0	0	12	13	6	0	0	0	6	11	8	7	17	17	17	30	9	4	6	19	2
IPI00410714,	HBA2; HBA1 Hemoglobin subunit alpha	142	0.753521	9.08795	12	0.0501232	0.0549099	0.0428529	0.0296919	0.0650323	0.0760008	0.0742084	0.063954	0.0451282	0.0218844	0.0504185	0.0734472	0.0442479	0.0429954	0.0387546	0.0182215	0.0452106	0.0414794	0.0293505	0.0284407	0.0743324	0.0387708	0.0279804	351	365	255	184	406	449	428	401	393	200	467	666	425	428	365	186	414	366	237	248	616
IPI00219034,	NDUFA8 NADH dehydrogenase [ubiquinone] 1 alpha subcomplex subunit 8	172	0.465116	7.73711	8	0.00884205	0.00869391	0.00638202	0.00985852	0.00621528	0.00489102	0.00515314	0.00526676	0.00758413	0.00903366	0.00953711	0.00518962	0.00653247	0.00729828	0.00587307	0.00930097	0.00432754	0.00561387	0.00807708	0.00880505	0.0110581	0.0120671	0.0104425	75	70	46	74	47	35	36	40	80	100	107	57	76	88	67	115	48	60	79	93	111
IPI00784154,	HSPD1 60 kDa heat shock protein, mitochondrial	573	0.73473	5.54779	43	0.00318499	0.00466016	0.00191572	0.00231943	0.0040886	0.00356553	0.00197652	0.00387332	0.0038417	0.00390481	0.00527076	0.00363485	0.00510861	0.00415746	0.00384164	0.00534105	0.00332873	0.00415668	0.00435802	0.00454719	0.00373802	0.00377572	0.00424276	90	125	46	58	103	85	46	98	135	144	197	133	198	167	146	220	123	148	142	160	125
IPI00300567,IPI00398758,	DCI Isoform 1 of 3,2-trans-enoyl-CoA isomerase, mitochondrial	293.5	0.180731	8.95959	5	0.00165815	0.00109176	0.00235786	0.00234219	0.00193742	0.00171977	0.00176161	0.00192905	0.00177781	0.0015882	0.00198489	0.00245437	0.00136003	0.0018469	0.00118151	0.00127972	0.00126803	0.00186428	0.00155783	0.00177549	0.00180984	0.00125852	0.00154536	24	15	29	30	25	21	21	25	32	30	38	46	27	38	23	27	24	34	26	32	31
IPI00412545,IPI00554681,	NDUFA5 Putative uncharacterized protein DKFZp781K1356	116	0.525862	5.54365	6	0.00314655	0.00423561	0.00308576	0.00296307	0.00254904	0.0037297	0.0027592	0.0029285	0.00210852	0.00187526	0.00171809	0.00148499	0.00178428	0.00209054	0.0025995	0.00383752	0.00187153	0.0024972	0.00288039	0.00294808	0.00221574	0.00303264	0.00265882	18	23	15	15	13	18	13	15	15	14	13	11	14	17	20	32	14	18	19	21	15
IPI00328156,IPI00873589,	MAOB Amine oxidase [flavin-containing] B	520	0.457692	7.45747	19	0.00167681	0.00152	0.0019733	0.00198298	0.00166216	0.00152535	0.00198858	0.00113235	0.0019128	0.00170319	0.00156255	0.00201772	0.00179114	0.00164594	0.00142073	0.00144461	0.00199802	0.00148552	0.00155565	0.00144056	0.00118627	0.00101477	0.00143047	43	37	43	45	38	33	42	26	61	57	53	67	63	60	49	54	67	48	46	46	36
IPI00009346,	TMEM14C Transmembrane protein 14C	112	0.5	10.2511	3	0.000724206	0.00152587	0.00106532	0.00122756	0.00142158	0.00171685	0.00153878	0.000606618	0.000727941	0.00124858	0.000684405	0.00195749	0.001848	0.00203783	0.00269234	0.00260831	0.0024922	0.000718441	0.000942083	0.00087239	0.00091795	0.00125638	0.00113391	4	8	5	6	7	8	7	3	5	9	5	14	14	16	20	21	18	5	6	6	6
IPI00220362,	HSPE1 10 kDa heat shock protein, mitochondrial	102	0.598039	9.49218	7	0.00198802	0.00356036	0.00327534	0.00336976	0.00490585	0.00424162	0.00410342	0.00333045	0.00143875	0.00258965	0.00180361	0.0032241	0.00304377	0.00335643	0.00443445	0.00518253	0.00395276	0.0012622	0.00189648	0.00159653	0.00134393	0.00206933	0.00177868	10	17	14	15	22	18	17	15	9	17	12	21	21	24	30	38	26	8	11	10	8
IPI00029264,	CYC1 Cytochrome c1, heme protein, mitochondrial	325	0.433846	9.24651	15	0.0026829	0.00269492	0.00528662	0.00528794	0.00524891	0.00465926	0.00446958	0.00550498	0.00526805	0.00807971	0.00669832	0.00414386	0.00436697	0.00438918	0.00454633	0.0041947	0.00372168	0.00396137	0.00541094	0.0046098	0.00495599	0.00627803	0.00547067	43	41	72	75	75	63	59	79	105	169	142	86	96	100	98	98	78	80	100	92	94
IPI00303954,IPI00641334,	CYB5B cytochrome b5 outer mitochondrial membrane precursor	148	0.439269	4.61509	3	0.00246621	0.00158773	0.00403095	0.00294171	0.0019979	0.000649618	0.00149719	0.000765104	0.0017628	0.00199473	0.00196813	0.00148134	0.0011987	0.00154214	0.00122247	0.00103393	0.00188599	0.00108737	0.00118821	0.00110031	0.00173666	0.00106962	0.00147102	18	11	25	19	13	4	9	5	16	19	19	14	12	16	12	11	18	10	10	10	15
IPI00024572,IPI00032450,	ASPH aspartate beta-hydroxylase isoform e	217.5	0.257778	10.3464	6	0.00344955	0.00225899	0.00778983	0.00305525	0.00491507	0.0034258	0.00452792	0.00291549	0.00292381	0.00278611	0.00352429	0.00597597	0.00333065	0.00485332	0.00270348	0.00319793	0.00427779	0.00303364	0.00299156	0.00336923	0.00236346	0.00258785	0.00425411	37	23	71	29	47	31	40	28	39	39	50	83	49	74	39	50	60	41	37	45	30
IPI00011525,IPI00843888,	CASQ1 calsequestrin 1	393	0.399514	3.76682	17	0.0189362	0.0115236	0.0250169	0.0107867	0.0109386	0.0173694	0.0189822	0.0105456	0.0115344	0.0103586	0.012366	0.0175726	0.0105708	0.0128855	0.00820993	0.00881385	0.0129422	0.00577385	0.00604084	0.00832877	0.00693251	0.00711629	0.0127875	367	212	412	185	189	284	303	183	278	262	317	441	281	355	214	249	328	141	135	201	159
IPI00025880,IPI00872223,	MYH6 Myosin-6; MYH7 223 kDa protein; MYH7 Myosin-7	1935	0.617571	5.53569	169	0.0142206	0.0175755	0.00572223	0.0114039	0.00782861	0.0154401	0.0152813	0.0141032	0.0107273	0.013426	0.00870719	0.00412742	0.00882456	0.00914866	0.0174926	0.0128326	0.0198746	0.014621	0.0168312	0.0127079	0.00750047	0.0132988	0.0116637	1357	1592	464	963	666	1243	1201	1205	1273	1672	1099	510	1155	1241	2245	1785	2480	1758	1852	1510	847
IPI00024990,	ALDH6A1 Methylmalonate-semialdehyde dehydrogenase [acylating], mitochondrial	535	0.328972	8.6853	14	0.000416926	0.000559011	0	0	0	0.000134781	0	0	0.000213348	8.71284e-05	0.000114622	0.00032198	0.000110535	0	0.000338178	0.000182013	0.000550716	0.000511369	0.000493053	0.000456578	0.000672592	0.000328772	0.000135645	11	14	0	0	0	3	0	0	7	3	4	11	4	0	12	7	19	17	15	15	21
IPI00027448,	ATP5L ATP synthase subunit g, mitochondrial	103	0.475728	10.1329	6	0.00492179	0.0099552	0.00741381	0.00823139	0.00794981	0.00583395	0.00525876	0.00637636	0.00379943	0.00512902	0.00550713	0.00744987	0.00746377	0.00789413	0.00863641	0.0102644	0.00797933	0.00515604	0.00597567	0.00553361	0.00515716	0.00631849	0.00352282	25	48	32	37	36	25	22	29	24	34	37	49	52	57	59	76	53	33	35	35	31
IPI00027487,	CKM Creatine kinase M-type	381	0.467192	7.28169	15	0.000479002	0.0008971	0.000250532	0.000300714	0	0.000567777	0.000323104	0.000237764	0.000213988	0.000693292	0.000120714	0.000164409	0.000271622	0.000299524	0.00134546	0.000839772	0.00187224	0.000718064	0.00087697	0.000512901	0.000134922	0.000692493	0.00171426	9	16	4	5	0	9	5	4	5	17	3	4	7	8	34	23	46	17	19	12	3
IPI00020530,	THEM2 Thioesterase superfamily member 2	140	0.378571	9.7347	4	0.000434523	0.00106811	0.00204542	0.00229144	0.00227453	0	0	0.00177941	0.000698823	0.00088788	0.000876039	0.00190156	0.0025344	0.00254729	0.00183079	0.00258347	0.0015507	0.00172426	0.00175855	0.00174478	0.00110154	0.00175893	0.0012959	3	7	12	14	14	0	0	11	6	8	8	17	24	25	17	26	14	15	14	15	9
IPI00791534,IPI00926256,	SLC4A1 Solute carrier family 4 anion exchanger member 1 variant	920	0.244589	4.90983	16	0.00125634	0.000255417	0.00134879	0.000124535	0.000445017	0.000418015	0.000829605	7.38492e-05	0.000744399	6.75561e-05	0.00139976	0.00158301	0.000321391	0.000635715	0.000950514	0.000272172	0.000640507	0.000769669	0.000630786	0.000159306	0.000670503	0.000822109	0.000433843	57	11	52	5	18	16	31	3	42	4	84	93	20	41	58	18	38	44	33	9	36
IPI00059366,IPI00304171,IPI00744148,	H2AFY H2A histone family, member Y isoform 2	370.667	0.0998213	10.4953	2	0	0	0	0.000247278	0	0.000194535	0	0	0	0	0	0.000718216	0.000319079	0.000500295	0.00028473	0.000450357	0.000585696	0	0	0	0	0	0.000391566	0	0	0	4	0	3	0	0	0	0	0	17	8	13	7	12	14	0	0	0	0
IPI00215901,IPI00218988,	AK2 Isoform 1 of Adenylate kinase 2, mitochondrial	235.5	0.654072	8.02309	13	0.000774946	0.00054426	0.00212793	0.00214062	0.00193166	0.00224539	0.00240456	0.00221182	0.00242338	0.00230924	0.00214825	0.00299234	0.00251108	0.00230176	0.00166457	0.0017721	0.00171203	0.00136672	0.00134412	0.00159043	0.00218281	0.00164316	0.00154077	9	6	21	22	20	22	23	23	35	35	33	45	40	38	26	30	26	20	18	23	30
IPI00022832,IPI00640179,	BRP44 Brain protein 44	116	0.278365	10.9082	3	0.000699233	0.000920784	0	0.00138276	0	0.00124324	0.00106123	0.00156187	0.000421704	0.000937632	0.000792966	0.000944995	0.00152938	0.00184459	0.0015597	0.00251837	0.000401043	0.00152607	0.001516	0.00154423	0.00236346	0.00212285	0.00109481	4	5	0	7	0	6	5	8	3	7	6	7	12	15	12	21	3	11	10	11	16
IPI00220558,IPI00783826,	RYR1 Isoform 2 of Ryanodine receptor 1	5035.5	0.283984	4.96448	102	0.000112755	0	0.000241689	1.36517e-05	0	0	3.91152e-05	0	6.47637e-06	6.17134e-06	3.04452e-05	0.000136836	4.99113e-05	0.000104816	0	2.48633e-05	0.000117022	0	3.49232e-06	2.26377e-05	3.40285e-06	3.49306e-06	5.76468e-05	28	0	51	3	0	0	8	0	2	2	10	44	17	37	0	9	38	0	1	7	1
IPI00219381,	NDUFA2 NADH dehydrogenase [ubiquinone] 1 alpha subcomplex subunit 2	99	0.424242	10.1138	5	0.00122896	0.00258936	0.00409772	0.00486063	0.00436526	0.0036418	0.00373039	0.00320262	0.00181176	0.00235423	0.0013937	0.00363816	0.00373333	0.00475494	0.00502571	0.0064637	0.00407255	0.00243835	0.00248685	0.00230287	0.00155773	0.00230971	0.00183258	6	12	17	21	19	15	15	14	11	15	9	23	25	33	33	46	26	15	14	14	9
IPI00020510,	CISD1 CDGSH iron sulfur domain-containing protein 1	108	0.416667	9.50249	5	0.00187757	0.00474715	0.00220956	0.00403124	0.00273786	0.00333832	0.00296358	0.00587146	0.00286863	0.00230191	0.00312291	0.00492998	0.00547556	0.00647201	0.00530491	0.00373536	0.00272808	0.00283119	0.00309375	0.00286489	0.00222121	0.00325728	0.00319174	10	24	10	19	13	15	13	28	19	16	22	34	40	49	38	29	19	19	19	19	14
IPI00328415,IPI00446235,IPI00871319,	CYB5R3 cDNA FLJ56301, highly similar to NADH-cytochrome b5 reductase	304	0.549154	7.41495	15	0.00160088	0.000772974	0.00463134	0.00354269	0.0022446	0.00316262	0.00307757	0.00119195	0.00219915	0.00184001	0.00105903	0.00273018	0.00218842	0.0019708	0.00257898	0.00109824	0.0031116	0.00148226	0.00167757	0.00160703	0.00202915	0.00144649	0.00244685	24	11	59	47	30	40	38	16	41	36	21	53	45	42	52	24	61	28	29	30	36
IPI00910616,	- cDNA FLJ58651, highly similar to Alpha-actinin-3	944	0.158898	6.33711	13	0.00118144	0.00122199	0.000379182	0.000145642	0	0.000483773	0.000834595	0.000407839	0.00065638	0.000230435	0.000227362	0.00185796	0.00076739	0.000181333	0.000574975	0.000501032	0.000722784	8.52388e-05	0.00014903	0.000207008	0.000363031	0.000149062	0.000461251	55	54	15	6	0	19	32	17	38	14	14	112	49	12	36	34	44	5	8	12	20
IPI00307547,	C9orf46 Transmembrane protein C9orf46	147	0.272109	10.192	5	0.00248299	0.000871926	0.000811673	0.000779401	0.00170203	0.000817547	0.00133989	0.00184874	0.00144202	0.0009513	0.000938613	0.00202407	0.001408	0.00203783	0.000923089	0.00151412	0.000949408	0.00218953	0.00215333	0.00265871	0.00221474	0.00215379	0.00246837	18	6	5	5	11	5	8	12	13	9	9	19	14	21	9	16	9	20	18	24	19
IPI00013459,IPI00791036,	NDUFB5 NADH dehydrogenase [ubiquinone] 1 beta subcomplex subunit 5, mitochondrial	188	0.345755	10.0217	10	0.00237293	0.00204532	0.00266557	0.00292524	0.00278267	0.00306841	0.00275017	0.00337297	0.00199487	0.00264475	0.00244638	0.00166595	0.00196596	0.00182104	0.00208513	0.00192386	0.00164968	0.00273925	0.00271266	0.00216551	0.00236974	0.00318105	0.00231607	22	18	21	24	23	24	21	28	23	32	30	20	25	24	26	26	20	32	29	25	26
IPI00003021,IPI00640401,	ATP1A2 Sodium/potassium-transporting ATPase subunit alpha-2	1014.5	0.320364	5.2965	27	0.000739554	0.000126341	0.000541009	0.000112934	0.000246622	0.000118462	9.70746e-05	0	0.000353602	6.12633e-05	0.000120893	0.000308722	0	0.000168731	7.43081e-05	0.000397653	0.000122283	7.93154e-05	8.6671e-05	1.60519e-05	0.000135121	0.000138703	0.000286132	37	6	23	5	11	5	4	0	22	4	8	20	0	12	5	29	8	5	5	1	8
IPI00465248,	ENO1 Isoform alpha-enolase of Alpha-enolase	434	0.410138	7.46046	15	9.34459e-05	0.00152587	0	0.000263991	0.000104817	0.000276911	0.000113459	0.000260911	0.000488425	0.000644429	0	0.000180414	0.000476903	0.000525892	0.0019107	0.00141033	0.00182225	0.00107534	0.00109403	0.000938054	0.000118445	0.000648454	0.000836062	2	31	0	5	2	5	2	5	13	18	0	5	14	16	55	44	51	29	27	25	3
IPI00473011,	HBB Hemoglobin subunit beta; HBD Hemoglobin subunit delta	147	0.687075	8.2608	10	0.00648337	0.00610348	0.00405837	0.00436465	0.00479663	0.00490528	0.00485712	0.00908964	0.0036605	0.0014798	0.00344158	0.00553956	0.00382172	0.00475494	0.0029744	0.00141949	0.00316469	0.00273692	0.0020337	0.00188325	0.00711047	0.00323069	0.00222154	47	42	25	28	31	30	29	59	33	14	33	52	38	49	29	15	30	25	17	17	61
IPI00384280,	PCYOX1 Prenylcysteine oxidase 1	505	0.289109	6.10431	11	0.000762926	8.46027e-05	0.000803316	9.07501e-05	0.000135121	0	0.000341275	0	0.000193733	6.15362e-05	0.000182147	0.000651205	0.000234202	0.000621438	0.000388124	0.000192826	0.000491311	0	0	0.000322468	0	0	0.000538887	19	2	17	2	3	0	7	0	6	2	6	21	8	22	13	7	16	0	0	10	0
IPI00002521,IPI00456008,	ATP5J ATP synthase-coupling factor 6, mitochondrial	112	0.554278	9.90208	8	0.000905257	0.000762935	0.00319596	0.00368267	0.00426474	0.00321909	0.00175861	0.00181985	0	0.00152604	0.000821286	0.000838924	0.001056	0.000764187	0.00323081	0.00471981	0.00332293	0.00114951	0.00188417	0.00130858	0.000611967	0.00141343	0.00194384	5	4	15	18	21	15	8	9	0	11	6	6	8	6	24	38	24	8	12	9	4
IPI00418414,	COQ3 Hexaprenyldihydroxybenzoate methyltransferase, mitochondrial	369	0.165312	7.49779	5	0	0	0.00025868	0.000558888	0.000369842	0	0	0.000306871	0	0.000252649	0.000415465	0.000169755	0.000280455	0.000231949	0.000490313	0.00049009	0.00037822	0.000305289	0.000476573	0.000353054	0.000417928	0.000476675	0.000295001	0	0	4	9	6	0	0	5	0	6	10	4	7	6	12	13	9	7	10	8	9
IPI00025341,IPI00925346,	BDH1 D-beta-hydroxybutyrate dehydrogenase, mitochondrial	299.5	0.306977	8.58551	7	0.000135411	0.000142652	0.000478061	0.000535562	0.000607554	0.000642027	0.000575439	0.000983011	0.000435549	0.000570674	0.000870188	0.000522869	0.000839159	0.000714432	0.000604092	0.000650264	0.000724868	0.000752264	0.00105689	0.00114183	0.000858184	0.000939663	0.000545185	2	2	6	7	8	8	7	13	8	11	17	10	17	15	12	14	14	14	18	21	15
IPI00328534,IPI00658052,	SRL Isoform 2 of Sarcalumenin	894.5	0.267659	4.04946	20	0.00204024	0.00102691	0.00264109	0.0010503	0.00116968	0.00112857	0.00154137	0.000962089	0.00107551	0.000920636	0.00135397	0.00161064	0.00135527	0.0017223	0.00150013	0.00110417	0.00145622	0.000899558	0.000806045	0.00105591	0.000727929	0.000845546	0.0016023	90	43	99	41	46	42	56	38	59	53	79	92	82	108	89	71	84	50	41	58	38
IPI00304417,IPI00304419,	IDH3B Isocitrate dehydrogenase 3, beta subunit isoform a precursor	388	0.237153	8.15907	6	0	0	0.000492025	0.000236231	0	0	0	0	0	0	0.000118536	0	0.000152412	0.000404415	7.77171e-05	0.000107559	0	0.000290339	0.000135971	0.000209853	0.000397463	0.000498666	0.000187036	0	0	8	4	0	0	0	0	0	0	3	0	4	11	2	3	0	7	3	5	9
IPI00017802,	AUH Isoform 1 of Methylglutaconyl-CoA hydratase, mitochondrial	339	0.174041	10.0753	5	0	0	0	0.000270376	0	0	0	0	0	0.000320842	0.000180893	0	0.000174443	8.41583e-05	0	0.000123106	0	0.000189889	0.000311249	0.000240186	0.000202184	0.000259429	0.000214071	0	0	0	4	0	0	0	0	0	7	4	0	4	2	0	3	0	4	6	5	4
IPI00002352,	MYLPF Myosin regulatory light chain 2, skeletal muscle isoform	169	0.87574	4.61581	17	0.00971893	0.00682579	0.00974296	0.011525	0.00592185	0.019058	0.0118004	0.0124626	0.0043418	0.00864238	0.00671284	0.00472577	0.0126845	0.00911599	0.0162369	0.014158	0.0131213	0.00647532	0.00998943	0.0120448	0.00730015	0.00666104	0.0202896	81	54	69	85	44	134	81	93	45	94	74	51	145	108	182	172	143	68	96	125	72
IPI00007856,	- 227 kDa protein; MYH1 Myosin-1; MYH2 Myosin-2; MYH6 Myosin-6; MYH7 Myosin-7; MYH8 Myosin-8	1941	0.648635	5.56473	175	0.00260132	0.00275144	0.00186873	0.00175901	0.00106637	0.00382642	0.0017124	0.00190184	0.000781271	0.00196926	0.0023932	0.0012586	0.00383882	0.00177116	0.00208175	0.00326812	0.00212512	0.000654999	0.00173047	0.0024666	0.00107701	0.000743083	0.00388835	249	250	152	149	91	309	135	163	93	246	303	156	504	241	268	456	266	79	191	294	122
IPI00219772,	NDUFB7 NADH dehydrogenase [ubiquinone] 1 beta subcomplex subunit 7	137	0.510949	9.21137	9	0.00444038	0.00405414	0.00627062	0.00719211	0.00547879	0.00280711	0.00269568	0.00314083	0.00547497	0.00499027	0.00548323	0.00434363	0.00593518	0.00645562	0.00484229	0.00720936	0.00362207	0.00622579	0.00693153	0.00725081	0.00675397	0.0083453	0.00847535	30	26	36	43	33	16	15	19	46	44	49	38	55	62	44	71	32	53	54	61	54
IPI00744115,IPI00895869,	PCCA cDNA FLJ56469, highly similar to Propionyl-CoA carboxylase alpha chain, mitochondrial; PCCA propionyl-Coenzyme A carboxylase, alpha polypeptide isoform a precursor	715	0.195869	7.469	11	0	0	0	0	0	0	0	0	0	6.5194e-05	0	0	0	0	0	1.9456e-05	0	2.25078e-05	7.37855e-05	4.55514e-05	2.39651e-05	7.38013e-05	2.53742e-05	0	0	0	0	0	0	0	0	0	3	0	0	0	0	0	1	0	1	3	2	1
IPI00106966,	TMEM70 Isoform 1 of Transmembrane protein 70, mitochondrial	260	0.238461	9.16993	5	7.79914e-05	0	0	0.000440661	0	0	0	0	6.27149e-05	0.000239045	0.000471713	0	0	0	0	0	0	0.000123793	0.000135273	0.000187899	0.000197712	0.000270605	0	1	0	0	5	0	0	0	0	1	4	8	0	0	0	0	0	0	2	2	3	3
IPI00022442,	NDUFAB1 Acyl carrier protein, mitochondrial	156	0.115385	4.53009	4	0.00103988	0.00205406	0.000917815	0.00132198	0.00116643	0.00107853	0.00126259	0.00101622	0.000627149	0.000697213	0.000687915	0.00110422	0.00132677	0.00100585	0.00125643	0.00151594	0.00109344	0.000825286	0.000901823	0.000835109	0.000659041	0.000676512	0.00069779	8	15	6	9	8	7	8	7	6	7	7	11	14	11	13	17	11	8	8	8	6
IPI00005537,	MRPL12 39S ribosomal protein L12, mitochondrial	198	0.409091	9.27359	7	0.00225308	0.00151046	0.00156678	0.00254604	0.00149338	0.00121393	0.00111912	0.00102941	0.00164706	0.0024327	0.00240026	0.000869996	0.000970667	0.00093658	0.000913765	0.00147541	0.000469909	0.000975339	0.00159869	0.000986947	0.00112503	0.00124369	0.00128281	22	14	13	22	13	10	9	9	20	31	31	11	13	13	12	21	6	12	18	12	13
IPI00013508,IPI00759776,IPI00909239,IPI00921118,	ACTN1 Alpha-actinin-1; ACTN2 Alpha-actinin-2	905.75	0.191071	5.15806	22	0.000291041	0.000283021	0.000316156	0.000379482	0.000803587	0.000318444	0.000489285	0.000250037	0.000306045	0.000188702	0.000270815	0.000760736	0.000424382	0.000566971	0.000199752	0.000184303	0.000342412	0.000124374	0.000174739	0.000341604	0.00030269	0.000174777	0.000240365	13	12	12	15	32	12	18	10	17	11	16	44	26	36	12	12	20	7	9	19	16
IPI00012728,	ACSL1 Isoform 1 of Long-chain-fatty-acid--CoA ligase 1	698	0.34957	7.16	27	0.00159782	0.00180569	0.00150427	0.00292175	0.00228105	0.00192838	0.00158728	0.00194674	0.00175206	0.00204798	0.00235012	0.00154804	0.00241458	0.00198236	0.00155523	0.00215242	0.00173287	0.00175226	0.00178879	0.00240303	0.00147293	0.00141118	0.0016635	55	59	44	89	70	56	45	60	75	92	107	69	114	97	72	108	78	76	71	103	60
IPI00218848,	ATP5I ATP synthase, H+ transporting, mitochondrial F0 complex, subunit E	72	0.694444	9.79536	5	0.00112654	0.00326367	0.00430863	0.00541034	0.00505451	0.00300448	0.00444538	0.00251634	0.00158529	0.00258965	0.00191633	0.00434998	0.00616	0.00594368	0.00774797	0.00850117	0.00538438	0.0029057	0.00317517	0.0027141	0.00237987	0.00268726	0.00201584	4	11	13	17	16	9	13	8	7	12	9	20	30	30	37	44	25	13	13	12	10
IPI00042580,IPI00797546,IPI00843886,	APOO Isoform 1 of Apolipoprotein O	185.333	0.557025	9.36898	8	0.00153177	0.00115264	0.00103007	0.00123639	0.00147272	0.00116721	0.00106276	0.00109977	0.00158366	0.00234745	0.00165439	0.00101395	0.00127632	0.00153937	0.000976217	0.00135107	0.00092038	0.00138933	0.00161306	0.001318	0.00129438	0.00180322	0.00137048	14	10	8	10	12	9	8	9	18	28	20	12	16	20	12	18	11	16	17	15	14
IPI00418497,IPI00656071,	TIMM50 Isoform 2 of Mitochondrial import inner membrane translocase subunit TIM50	404.5	0.20606	9.18683	6	0.000100261	0	0	0	0.000112461	0	0	0	0.000362801	0.000499364	0.000379003	0.000387143	0.00062133	0.000282123	0.000410008	0.000447078	0.000421698	0.000318281	0.000304324	0.000442845	0.000423611	0.000608777	0.000224259	2	0	0	0	2	0	0	0	9	13	10	10	17	8	11	13	11	8	7	11	10
IPI00103467,	ALDH1B1 Aldehyde dehydrogenase X, mitochondrial	517	0.411992	6.78643	15	0.000431442	0.000371876	0.000369256	0.000842115	0.00101188	0.000697366	0.000333354	0.000262829	0.0010408	0.00114205	0.00056341	0.00115102	0.00188732	0.000441465	0.00113735	0.000538144	0.000719861	0.000591429	0.000544234	0.000850454	0.000397719	0.000340219	0.000666747	11	9	8	19	23	15	7	6	33	38	19	38	66	16	39	20	24	19	16	27	12
IPI00021016,IPI00910455,	TSFM Isoform 1 of Elongation factor Ts, mitochondrial	305	0.372092	6.97407	7	0	0	0	0	0	0	0	0	0	0.000101888	0.000150794	0	0	4.67699e-05	0.0001483	0.000273659	0.000101685	0.000105528	0.000172973	0.000160177	5.61806e-05	0.00017301	0.000118967	0	0	0	0	0	0	0	0	0	2	3	0	0	1	3	6	2	2	3	3	1
IPI00028031,	ACADVL cDNA FLJ56425, highly similar to Very-long-chain specific acyl-CoAdehydrogenase, mitochondrial	701	0.552068	9.48874	37	0.00740529	0.007588	0.00806787	0.00912	0.00801439	0.00802339	0.0086049	0.0101766	0.00856	0.00904346	0.00833236	0.00750604	0.00972243	0.00864843	0.00699011	0.00817594	0.00645941	0.00775958	0.00802764	0.00803777	0.00735757	0.00752752	0.0061079	256	249	237	279	247	234	245	315	368	408	381	336	461	425	325	412	292	338	320	346	301
IPI00000792,	CRYZ Quinone oxidoreductase	329	0.516717	8.69633	13	0	0	0	0	0	0	0	6.88361e-05	0.000198248	4.72277e-05	0	0.000190394	0.000179745	4.33581e-05	0	0	0	0	5.34515e-05	9.89946e-05	0	0.000106926	5.51445e-05	0	0	0	0	0	0	0	1	4	1	0	4	4	1	0	0	0	0	1	2	0
IPI00003362,	HSPA5 HSPA5 protein	655	0.374046	4.79502	22	0.00176463	0.000750123	0.00185805	0.000349838	0.000312531	0.000477048	0.000639007	0.00024203	0.000522784	0.000426996	0.000421301	0.00083679	0.000473991	0.000522681	0.00016113	0.000530955	0.000733919	0.000442253	0.000563812	0.000770722	0.000261604	0.000456517	0.000664765	57	23	51	10	9	13	17	7	21	18	18	35	21	24	7	25	31	18	21	31	10
IPI00029561,IPI00894154,	NDUFA10 NADH dehydrogenase [ubiquinone] 1 alpha subcomplex subunit 10, mitochondrial	372.5	0.355146	8.59349	14	0.000108874	0.000172045	0.000256249	0	0	0	0	0	0.000131322	0.000417125	0.000370405	8.40801e-05	0.000317509	0.000153179	0.000242853	0.000336105	0.000208148	0.00073445	0.000660934	0.000655756	0.000460002	0.000613855	0.000389638	2	3	4	0	0	0	0	0	3	10	9	2	8	4	6	9	5	17	14	15	10
IPI00009922,	C14orf156 SRA stem-loop-interacting RNA-binding protein, mitochondrial	109	0.422018	10.9978	4	0	0	0	0.000420448	0	0	0	0	0	0.000427649	0	0.000287338	0.000542532	0.00039261	0.000691611	0.00102099	0.000284532	0.000442929	0.000322671	0.000448201	0	0.000484109	0	0	0	0	2	0	0	0	0	0	3	0	2	4	3	5	8	2	3	2	3	0
IPI00220063,	NDUFS5 NADH dehydrogenase [ubiquinone] iron-sulfur protein 5	106	0.349057	9.53822	5	0.000382599	0.00161224	0.00112562	0.00172939	0	0.00113377	0.000929077	0.00170921	0.000922974	0.00117267	0.000867774	0.00132962	0.00153419	0.00134574	0.00156461	0.00223101	0.00146292	0.00106275	0.000829507	0.0010754	0.000646606	0.000995622	0.000684624	2	8	5	8	0	5	4	8	6	8	6	9	11	10	11	17	10	7	5	7	4
IPI00926319,	DLD cDNA FLJ56112, highly similar to Dihydrolipoyl dehydrogenase, mitochondrial	486	0.432099	8.08617	19	0.00429755	0.00391201	0.00491012	0.00495064	0.00313567	0.00385761	0.00369815	0.00344832	0.00345577	0.00370864	0.00305983	0.00376998	0.00352869	0.00343413	0.00304024	0.00369243	0.00341409	0.00403983	0.00325658	0.0040544	0.00408985	0.00300394	0.00410634	103	89	100	105	67	78	73	74	103	116	97	117	116	117	98	129	107	122	90	121	116
IPI00021428,	ACTA1 Actin, alpha skeletal muscle; ACTB Actin, cytoplasmic 1	377	0.71618	5.05026	31	0.0146301	0.012636	0.00955794	0.0106974	0.0139368	0.0079057	0.00868576	0.00871041	0.0117212	0.00745984	0.00805165	0.0157845	0.0110586	0.0126	0.0122777	0.0096307	0.0143553	0.00986075	0.0115216	0.0115763	0.00772669	0.00671846	0.0076035	272	223	151	176	231	124	133	145	271	181	198	380	282	333	307	261	349	231	247	268	170
IPI00011217,	NDUFS4 NADH dehydrogenase [ubiquinone] iron-sulfur protein 4, mitochondrial	175	0.514286	11.0167	8	0.00451904	0.00317381	0.00231814	0.00471382	0.00324933	0.00233491	0.00211033	0.00258824	0.00279529	0.00328516	0.00289093	0.00134228	0.0016896	0.00211935	0.00129232	0.0018283	0.00115195	0.00193117	0.00231124	0.00269859	0.00156664	0.00241225	0.00176242	39	26	17	36	25	17	15	20	30	37	33	15	20	26	15	23	13	21	23	29	16
IPI00220741,IPI00641363,	SPTA1 spectrin, alpha, erythrocytic 1	2417.5	0.22544	4.68792	36	2.51637e-05	0	0	0	0.000103495	1.98849e-05	2.03686e-05	0	0.000168623	0	0.000177563	0.000382186	2.44616e-05	2.95033e-05	1.24733e-05	0	2.56579e-05	3.32846e-05	1.45485e-05	0	0.00017011	4.3655e-05	0	3	0	0	0	11	2	2	0	25	0	28	59	4	5	2	0	4	5	2	0	24
IPI00554701,	UCRC Cytochrome b-c1 complex subunit 9	63	0.380952	9.96487	2	0.00193122	0.00305174	0.00378781	0.00400093	0.00433244	0.00305217	0.00156321	0.00287582	0.00362353	0.0036995	0.00243344	0.00347998	0.00375467	0.00339639	0.00430775	0.00485781	0.00443057	0.00153268	0.00195395	0.00232637	0.00217588	0.00195437	0.00172786	6	9	10	11	12	8	4	8	14	15	10	14	16	15	18	22	18	6	7	9	8
IPI00410261,	MYBPC1 Myosin-binding protein C, slow-type; MYBPC1 myosin binding protein C, slow type isoform 1	1171	0.438087	5.82031	57	0.00167971	0.00220737	0.000305677	0.000743593	0.000194238	0.00145734	0.00130356	0.00104436	0.000626613	0.00148612	0.000510586	0	0.000795382	0.000669996	0.00196994	0.00138991	0.00237041	0.00213017	0.00204239	0.00164098	0.000541416	0.00172739	0.00123946	97	121	15	38	10	71	62	54	45	112	39	0	63	55	153	117	179	155	136	118	37
IPI00007001,	MRPL11 39S ribosomal protein L11, mitochondrial	192	0.536458	10.6323	10	0	0	0	0.000119346	0	0	0	0	0	0.000161853	0	0	0	0.000148592	0	0.000289813	0	0.000922	0.000549549	0.000339263	0.000356981	0.000366444	0.000283477	0	0	0	1	0	0	0	0	0	2	0	0	0	2	0	4	0	11	6	4	4
IPI00011770,	NDUFA4 NADH dehydrogenase [ubiquinone] 1 alpha subcomplex subunit 4	81	0.530864	9.83456	4	0.00600822	0.00949431	0.00324068	0.00367762	0.00308887	0.00415435	0.00303957	0.00335512	0.00301961	0.00326104	0.00283901	0.00637997	0.00675319	0.00563549	0.00483957	0.00515223	0.00459467	0.00258284	0.00260527	0.00221149	0.00275007	0.00238867	0.00223982	24	36	11	13	11	14	10	12	15	17	15	33	37	32	26	30	24	13	12	11	13
IPI00289147,	HHATL Protein-cysteine N-palmitoyltransferase HHAT-like protein	504	0.180556	7.12916	9	0.000402336	4.23853e-05	0.000804909	4.54651e-05	4.51295e-05	0	0	0	6.47059e-05	3.08292e-05	9.1254e-05	0.000341784	0.000117333	0.000113213	2.99149e-05	0.000138006	0.000246143	0.000127723	0.000104676	3.23107e-05	3.39981e-05	0	0.000143988	10	1	17	1	1	0	0	0	2	1	3	11	4	4	1	5	8	4	3	1	1
IPI00303476,	ATP5B ATP synthase subunit beta, mitochondrial	529	0.765595	5.06708	31	0.0217344	0.0174047	0.0260736	0.023954	0.0227023	0.0170841	0.0195475	0.0204637	0.0249366	0.0241733	0.028256	0.0224686	0.0251803	0.0238107	0.0191528	0.0205904	0.0171486	0.0302088	0.0226385	0.0273976	0.0274032	0.0213466	0.0245216	567	431	578	553	528	376	420	478	809	823	975	759	901	883	672	783	585	993	681	890	846
IPI00025366,	CS Citrate synthase, mitochondrial	466	0.412017	8.52965	19	8.7029e-05	0	0.000102417	0	0	0	0	0	3.49911e-05	0.000233402	0.000263188	0	0.000126901	0.000214279	0.000420606	0.000417927	0.000332768	0.000310811	0.000301898	0.000244619	0.000110312	0.000188726	0.000233595	2	0	2	0	0	0	0	0	1	7	8	0	4	7	13	14	10	9	8	7	3
IPI00783847,	SLC25A42 Solute carrier family 25 member 42	318	0.157233	10.4717	3	0	6.71767e-05	0	0	0	0	0	7.12172e-05	0	0	4.82097e-05	0	4.64906e-05	0	4.74123e-05	4.37453e-05	0	0.000101214	0.000110601	0.000102419	0.000107768	0.000110625	0.000114104	0	1	0	0	0	0	0	1	0	0	1	0	1	0	1	1	0	2	2	2	2
IPI00853031,IPI00853201,	MRPL23 39S ribosomal protein L23, mitochondrial; MRPL23 Putative uncharacterized protein MRPL23	178.5	0.208304	11.9272	3	0	0.000119676	0.000133687	0.000128372	0	0.000134655	0	0	0	8.70471e-05	0.000171772	0	0	0	0	0.000155866	0	0.000270472	0.000295555	0.000182461	0	0	0.000101639	0	1	1	1	0	1	0	0	0	1	2	0	0	0	0	2	0	3	3	2	0
IPI00027776,IPI00554589,	FECH Ferrochelatase, mitochondrial	426	0.218321	8.90812	6	0	0	0.000112034	5.37897e-05	0	0	0	0	0	0	3.59875e-05	0	3.47042e-05	0.000100457	0	0	0.000109204	3.77772e-05	4.12806e-05	0	0	0	0	0	0	2	1	0	0	0	0	0	0	1	0	1	3	0	0	3	1	1	0	0
IPI00472058,IPI00478450,	NDUFB11 Neuronal protein	160.5	0.373922	4.97427	4	0.000505365	0.000665489	0	0.000856613	0.000850291	0.000299512	0.000613596	0.000564413	0.000304783	0.000484047	0.000668628	0.000390278	0.000644785	0.000799897	0.000657569	0.000953403	0	0.000501342	0.000766971	0.000811694	0.000213521	0.000219181	0	4	5	0	6	6	2	4	4	3	5	7	4	7	9	7	11	0	5	7	8	2
IPI00219682,	STOM Erythrocyte band 7 integral membrane protein	288	0.319444	8.06993	7	0.000211227	0	0.000165717	0	0	0	8.5488e-05	0	0	0	0.000266158	0.000163124	0	0	0.000314107	0	0.000215375	0.000167636	0.000244244	0	0	0.000244296	0.000566954	3	0	2	0	0	0	1	0	0	0	5	3	0	0	6	0	4	3	4	0	0
IPI00100247,	TMX4 Thioredoxin domain-containing protein 13	349	0.206304	4.02443	6	0.000987742	0.000122419	0.000547007	0.000196972	0.000130346	0	0.000282184	0	0.00028033	0	0.00017571	0	8.47221e-05	0.000286114	0	0	0	0.000276672	0.000352719	0.000186643	0	0.000151198	0.000207937	17	2	8	3	2	0	4	0	6	0	4	0	2	7	0	0	0	6	7	4	0
IPI00029557,IPI00909181,	GRPEL1 GrpE protein homolog 1, mitochondrial	206.5	0.276745	8.59932	5	0	0	0	0	0	0	0	0	0.000157926	0	0.000371203	0	0	0	0	0	0	0.000389663	0.0004258	0.00015772	0.000248936	0.000425891	0.000263572	0	0	0	0	0	0	0	0	2	0	5	0	0	0	0	0	0	5	5	2	3
IPI00183968,	TPM3 tropomyosin 3 isoform 1	285	0.466667	4.37624	25	0.00405555	0.00502199	0	0.0056281	0.00606541	0.00699992	0.00734297	0.00882044	0.00554972	0.00452507	0.00489506	0.0019781	0.00337179	0.00320333	0.00703599	0.00585727	0.00598516	0.00129874	0.00629378	0.00725665	0.00450923	0.00462877	0.00541093	57	67	0	70	76	83	85	111	97	83	91	36	65	64	133	120	110	23	102	127	75
IPI00783271,	LRPPRC Leucine-rich PPR motif-containing protein, mitochondrial	1394	0.348637	5.99725	34	0.000145465	0.000107271	0.000308133	0.000131503	0.000375281	5.17271e-05	0	4.87383e-05	0.000152063	0.000144901	0.00050589	0.000595392	0.000307558	0.000368389	0.00015142	0.000289397	6.67446e-05	0.000334792	0.000277534	0.000140183	0.000565433	0.0003533	0.00022125	10	7	18	8	23	3	0	3	13	13	46	53	29	36	14	29	6	29	22	12	46
IPI00006606,	MRPS26 28S ribosomal protein S26, mitochondrial	205	0.22439	11.0237	4	0	0	0	0	0	0	0	0	0	0.000227384	0	0	0	0	0	0	0	0.000392514	0.000343133	0.000158874	0.000501514	0.000343206	0.000354001	0	0	0	0	0	0	0	0	0	3	0	0	0	0	0	0	0	5	4	2	6
IPI00020495,IPI00874047,	MRPS36 28S ribosomal protein S36, mitochondrial	103	0.699029	10.6539	6	0.000590614	0	0	0	0.000662484	0	0	0.000659623	0	0.000603414	0	0	0	0.000276987	0.0014638	0.00337646	0.000602214	0.00140619	0.00170733	0.000790515	0.00066544	0.00153693	0	3	0	0	0	3	0	0	3	0	4	0	0	0	2	10	25	4	9	10	5	4
IPI00023001,	FAM162A UPF0389 protein FAM162A	154	0.201299	10.4827	4	0.000790043	0.000971009	0.00108469	0.00148795	0.00147697	0.00109254	0	0.00220588	0.000741176	0.000908059	0.000796399	0.00244051	0.003552	0.00314938	0.00176226	0.00334226	0.00181251	0.00229901	0.00216965	0.00200914	0.00178027	0.00239854	0.00164932	6	7	7	10	10	7	0	15	7	9	8	24	37	34	18	37	18	22	19	19	16
IPI00017283,	IARS2 Isoleucyl-tRNA synthetase, mitochondrial	1012	0.170949	7.19939	13	0	0	4.71605e-05	4.52854e-05	0	4.75017e-05	0	0	4.83376e-05	7.67683e-05	6.05956e-05	0	4.38261e-05	5.63827e-05	4.4695e-05	0.000178699	4.59694e-05	0	6.95081e-05	4.82746e-05	0	0.000104285	8.9637e-05	0	0	2	2	0	2	0	0	3	5	4	0	3	4	3	13	3	0	4	3	0
IPI00375577,	TMEM65 Transmembrane protein 65	240	0.141667	9.04619	3	0.000591435	0.000534055	0.00019886	0.00057286	0.000189544	0	0	0	0.000543529	0.000906378	0.000638778	0.000326248	0.000308	0.000475494	0.000188464	0.000347775	0.000129225	0.000268218	0.000586185	0.000814231	0.000999546	0.000732888	0.000604751	7	6	2	6	2	0	0	0	8	14	10	5	5	8	3	6	2	4	8	12	14
IPI00021338,	DLAT Dihydrolipoyllysine-residue acetyltransferase component of pyruvate dehydrogenase complex, mitochondrial	647	0.318393	7.94058	17	3.13412e-05	3.30173e-05	0	3.54164e-05	3.5155e-05	0	0	3.50032e-05	5.04046e-05	2.40153e-05	7.1085e-05	0	0	0	4.66062e-05	6.45024e-05	0	9.94936e-05	5.43603e-05	0.000125847	2.64839e-05	2.7186e-05	8.4123e-05	1	1	0	1	1	0	0	1	2	1	3	0	0	0	2	3	0	4	2	5	1
IPI00396118,	ATP2A1 Isoform SERCA1A of Sarcoplasmic/endoplasmic reticulum calcium ATPase 1; ATP2A1 Isoform SERCA1B of Sarcoplasmic/endoplasmic reticulum calcium ATPase 1	994	0.300805	4.81066	34	8.16006e-05	0	0.000648196	4.61054e-05	0.000137295	0	4.95383e-05	2.27838e-05	3.28086e-05	1.56317e-05	3.08464e-05	0.00014179	2.97465e-05	0.00015786	1.51681e-05	9.79649e-05	7.8003e-05	1.61902e-05	3.53834e-05	4.91488e-05	0	0	0.00018252	4	0	27	2	6	0	2	1	2	1	2	9	2	11	1	7	5	1	2	3	0
IPI00017855,IPI00790739,	ACO2 Aconitate hydratase, mitochondrial	792.5	0.516217	7.5176	43	0.00498948	0.0034503	0.00632337	0.00540693	0.00447731	0.00482234	0.00537458	0.00465801	0.00526726	0.00607792	0.00576472	0.00527596	0.0057084	0.00530994	0.00428057	0.00493249	0.00426565	0.00645754	0.00428266	0.00380146	0.00462701	0.00423919	0.00428095	195	128	210	187	156	159	173	163	256	310	298	267	306	295	225	281	218	318	193	185	214
IPI00290799,	C18orf19 Uncharacterized protein C18orf19	272	0.220588	10.3923	5	0.000298202	0	0	0.000589709	0.000501734	0.000176734	0	0.000499568	0.000359688	0.00085687	0.000958167	0.000230293	0.000597883	0.000524442	0.000388014	0.000664864	0.000228044	0.000354994	0.000840486	0.000658569	0.000881952	0.000581999	0.000667005	4	0	0	7	6	2	0	6	6	15	17	4	11	10	7	13	4	6	13	11	14
IPI00014479,IPI00217409,	SLC37A4 Isoform 1 of Glucose-6-phosphate translocase	440	0.122804	8.40385	3	0.000414772	0.000145651	0.000325407	0	0.000103388	0.000109254	0.000167867	0	0	0.000141254	0	0.000177954	0	9.72602e-05	0	0	0	0	0	0	0	0	0.000164932	9	3	6	0	2	2	3	0	0	4	0	5	0	3	0	0	0	0	0	0	0
IPI00017533,IPI00873158,IPI00909656,	MT-CO3 Cytochrome oxydase subunit III	261	0.0957864	7.32364	2	0	0	0	0	0	0.000184183	0	0.000347082	0.000499797	0.000416725	0.000704859	0	0	0.000382582	0.000404367	0.000373092	0.000415897	0.00110987	0.00114542	0.000873504	0.000459561	0.000269568	0.000695116	0	0	0	0	0	2	0	4	8	7	12	0	0	7	7	7	7	18	17	14	7
IPI00013991,	TPM1 Isoform 1 of Tropomyosin alpha-1 chain; TPM2 Isoform 1 of Tropomyosin beta chain; TPM3 tropomyosin 3 isoform 1	284	0.81338	4.35579	49	0.0107101	0.0112829	0.00226868	0.00766503	0.00969078	0.0109177	0.00996959	0.00893124	0.00803811	0.00607291	0.00653173	0.0055692	0.00619471	0.00567579	0.0103523	0.00876786	0.00950077	0.00186997	0.00712091	0.01078	0.00633515	0.00650309	0.0118182	150	150	27	95	121	129	115	112	140	111	121	101	119	113	195	179	174	33	115	188	105
IPI00003482,	DECR1 2,4-dienoyl-CoA reductase, mitochondrial	335	0.540299	9.84023	16	0.00175539	0.00159419	0.00292057	0.00396727	0.00414168	0.0032287	0.00345423	0.00338016	0.00272576	0.00282929	0.00251698	0.00158936	0.00278028	0.00246973	0.00261037	0.00352966	0.00203674	0.00336273	0.00320214	0.00301387	0.00352931	0.00372788	0.00341188	29	25	41	58	61	45	47	50	56	61	55	34	63	58	58	85	44	70	61	62	69
IPI00024993,	ECHS1 Enoyl-CoA hydratase, mitochondrial	290	0.486207	8.19244	16	0.00230747	0.00220988	0.00789954	0.00616318	0.00643143	0.00348106	0.00407512	0.00413895	0.00551026	0.00466137	0.00523357	0.00534597	0.00448618	0.00393513	0.00327538	0.00383752	0.00288751	0.00360707	0.00394159	0.00331308	0.00519961	0.00515549	0.00419155	33	30	96	78	82	42	48	53	98	87	99	99	88	80	63	80	54	65	65	59	88
IPI00398625,IPI00787362,IPI00887022,	HRNR Hornerin	2223.33	0.030756	10.1187	4	0	0	0	0	0	0	0	0	0	0	0	0	0	1.28319e-05	0	0	0	6.51444e-05	0.000102824	0.000102542	1.54139e-05	2.37337e-05	4.08003e-05	0	0	0	0	0	0	0	0	0	0	0	0	0	2	0	0	0	9	13	14	2
IPI00007321,IPI00398727,	LYPLA1 cDNA FLJ60607, highly similar to Acyl-protein thioesterase 1	238.5	0.233067	7.09835	4	0	0	0	0	0	0	0	0	0.000205105	0.000456039	0.000192839	0	0	0	0	0	0	0.000134953	0.000221202	0.000273117	0.00014369	0.000147499	0.000152139	0	0	0	0	0	0	0	0	3	7	3	0	0	0	0	0	0	2	3	4	2
IPI00219910,IPI00783862,	- 22 kDa protein	206.5	0.426153	7.76114	7	0.00304412	0.00206898	0.000231121	0	0.0016522	0.000698379	0.00178842	0.000438684	0.0015003	0.000225732	0.00111361	0.00204754	0.000787526	0.000483554	0.000292051	0	0.000901133	0.00124692	0.000851601	0.000867461	0.00248936	0.00136285	0.00105429	31	20	2	0	15	6	15	4	19	3	15	27	11	7	4	0	12	16	10	11	30
IPI00163114,	DHRS7C Dehydrogenase/reductase SDR family member 7C	312	0.38141	8.63406	10	0.000324964	0.000136937	0.00229454	0.000146887	0.000145803	0	0.000236736	0	0.000313575	0	0	0.000953649	0.000568616	0.000640088	0.000241621	0.000356693	0.000795231	0.000206322	0.000112728	0.000626331	0	0	0.000581492	5	2	30	2	2	0	3	0	6	0	0	19	12	14	5	8	16	4	2	12	0
IPI00006440,	MRPS7 28S ribosomal protein S7, mitochondrial	242	0.206612	10.6242	4	0	0	0	0	0	0	0	0	0	0	0.0002534	0	0	0.000117891	0	0.000114967	0	0.000199501	0.00029067	0.000403751	0.000212418	0.000363416	0.000224908	0	0	0	0	0	0	0	0	0	0	4	0	0	2	0	2	0	3	4	6	3
IPI00550165,IPI00871975,	DHRS7B Dehydrogenase/reductase SDR family member 7B	325	0.378462	10.0311	10	0.000249572	6.57298e-05	0.000367126	0	0	0	0	0	0	0	0	0	0	4.38918e-05	4.63912e-05	4.28031e-05	4.77139e-05	0	0	0.000100213	0	0	0	4	1	5	0	0	0	0	0	0	0	0	0	0	1	1	1	1	0	0	2	0
IPI00015972,	COX6C Cytochrome c oxidase subunit 6C	75	0.76	10.9784	10	0.00378518	0.0128173	0.00604534	0.00580498	0.00636868	0.00897339	0.0075503	0.00754902	0.00478306	0.00642233	0.00531463	0.0177479	0.0143898	0.0155962	0.0100514	0.01354	0.0093042	0.00536436	0.0053929	0.00607959	0.00342701	0.00469048	0.00532181	14	45	19	19	21	28	23	25	22	31	26	85	73	82	50	73	45	25	23	28	15
IPI00100656,IPI00644037,	GPSN2 Isoform 1 of Synaptic glycoprotein SC2	315.5	0.0951409	9.77155	3	0	0	0.000453817	0	0	0	0.00023411	0	0	0	0.000145775	0.000446717	0.000187436	0.000226067	9.5576e-05	0	0.000196602	0	0	0.00010323	0	0	0.00028752	0	0	6	0	0	0	3	0	0	0	3	9	4	5	2	0	4	0	0	2	0
IPI00011229,	CTSD Cathepsin D; CTSD Protein	412	0.228155	6.50461	8	9.84357e-05	0	0	0.000111235	0	0	0	5.49686e-05	3.95774e-05	3.77134e-05	7.44207e-05	3.80095e-05	3.58835e-05	0	3.6595e-05	0	0	0.000195304	0.000170733	7.90515e-05	8.31799e-05	4.26925e-05	8.80706e-05	2	0	0	2	0	0	0	1	1	1	2	1	1	0	1	0	0	5	4	2	2
IPI00016077,	GBAS Protein NipSnap homolog 2	286	0.520979	9.74152	16	0.00411227	0.00291303	0.00559033	0.00504758	0.00596467	0.00285741	0.00352952	0.00364254	0.00416199	0.00385731	0.0042883	0.00416138	0.00341169	0.00374078	0.00474455	0.00350207	0.0034701	0.00303855	0.00282845	0.0031886	0.00263617	0.00239854	0.00329864	58	39	67	63	75	34	41	46	73	71	80	76	66	75	90	72	64	54	46	56	44
IPI00013937,	CMA1 Chymase	247	0.153846	9.71312	2	0	0	0	0	0	0	0	0	0.000330078	0.000188719	0	0.000824206	0.000299271	0.000231009	0	0	0	0	0	0	0	0	0	0	0	0	0	0	0	0	0	5	3	0	13	5	4	0	0	0	0	0	0	0
IPI00219207,IPI00873380,	RTN4 Isoform 1 of Reticulon-4; RTN4 Isoform 3 of Reticulon-4	199	0.341709	9.71084	7	0.000407593	0.000214695	0.000719493	0	0.000114298	0	0.000618607	0	8.19391e-05	7.80799e-05	0.000154077	0	0.000297166	0.00028673	7.57644e-05	0	0.000155849	0.000161739	8.83696e-05	0.000245497	8.61059e-05	0	0	4	2	6	0	1	0	5	0	1	1	2	0	4	4	1	0	2	2	1	3	1
IPI00065495,IPI00152070,IPI00736624,	COQ10A Isoform 1 of Protein COQ10 A, mitochondrial	230.667	0.478411	10.1126	10	0.00351637	0.00342659	0.00310359	0.00466897	0.00345124	0.00197983	0.00266841	0.00304361	0.00487762	0.0061972	0.00458591	0.00251192	0.00326872	0.00321577	0.00209162	0.00265355	0.00154622	0.00209303	0.0028208	0.0036005	0.00363996	0.00312642	0.00275284	40	37	30	47	35	19	25	31	69	92	69	37	51	52	32	44	23	30	37	51	49
IPI00016458,	L2HGDH Isoform 1 of L-2-hydroxyglutarate dehydrogenase, mitochondrial	463	0.524838	8.34245	17	0	0	0.000257702	0.000247456	9.82518e-05	0	0	4.89138e-05	0.000387397	0.00040271	0.000794679	0.000777923	0.000638618	0.000492953	0.000260512	0.000180272	0.000468894	0.000243308	0.000151927	0	0.000222053	0.000265929	0.000235108	0	0	5	5	2	0	0	1	11	12	24	23	20	16	8	6	14	7	4	0	6
IPI00166749,	PMPCA Mitochondrial-processing peptidase subunit alpha	525	0.205714	6.91303	7	3.86243e-05	4.06899e-05	0	0	0	0	0	0	0	0	2.92013e-05	5.96568e-05	0	0	5.74367e-05	0	0	6.1307e-05	3.34963e-05	6.20366e-05	0	3.35034e-05	6.91144e-05	1	1	0	0	0	0	0	0	0	0	1	2	0	0	2	0	0	2	1	2	0
IPI00295621,IPI00856008,	HIGD1A HIG1 domain family member 1A	100	0.52256	10.1104	3	0	0	0.000238632	0.000229144	0.000227453	0.000240359	0	0	0.000163059	0.000155379	0.000153307	0.000313198	0.00014784	0.000285297	0.000301542	0.00027822	0.00031014	0	0.000175855	0	0.000171351	0.000175893	0	0	0	1	1	1	1	0	0	1	1	1	2	1	2	2	2	2	0	1	0	1
IPI00030275,	TRAP1 Heat shock protein 75 kDa, mitochondrial	704	0.319602	8.3988	17	0.000144018	0.000364128	0.00020338	0.00029294	0.000258469	0	0.000209834	0.000128676	0.000486397	0.000463489	0.000391978	8.89768e-05	0.000399	0.000506564	0.000149915	0.000493999	0.00022027	0.000525768	0.000524569	0.000323842	0.000486792	0.000449727	0.000360789	5	12	6	9	8	0	6	4	21	21	18	4	19	25	7	25	10	23	21	14	20
IPI00021890,	HSD17B8 Estradiol 17-beta-dehydrogenase 8	261	0.252874	6.50407	5	0	0.000245542	0.000548579	0.000614562	0.00052288	0.000552549	0.00056599	0.000433852	0.000437322	0.000357193	0.000352429	0.000299999	0.000283219	0.000163964	0.000577667	0.00047969	0.00047531	0.000493275	0.000471643	0.000436752	0.000525213	0.00033696	0.00041707	0	3	6	7	6	6	6	5	7	6	6	5	5	3	10	9	8	8	7	7	8
IPI00453473,	HIST2H4A; HIST1H4A; HIST1H4B; HIST1H4C; HIST1H4D; HIST1H4E; HIST1H4F; HIST1H4H; HIST1H4I; HIST1H4J; HIST1H4K Histone H4; HIST1H4L; HIST2H4B; HIST4H4	103	0.601942	11.9087	12	0.00944983	0.0122366	0.0111207	0.0124583	0.00772898	0.00910096	0.006932	0.00505711	0.00712392	0.00437475	0.00491177	0.0266067	0.0116263	0.0177272	0.0141988	0.013776	0.0189697	0.00296863	0.0030732	0.00426878	0.0113125	0.0051231	0.0146197	48	59	48	56	35	39	29	23	45	29	33	175	81	128	97	102	126	19	18	27	68
IPI00026185,	CAPZB Isoform 1 of F-actin-capping protein subunit beta	303	0.382838	6.16126	12	0.000133847	0.00105753	0	0	0.000675603	0.0011899	0.000812559	0.000822171	0.000645777	0.000256401	0.000556559	0.000826927	0.00102463	0.000423708	0.00154254	0.00114777	0.00107474	0.000318675	0.000870572	0.000859914	0.000904822	0.00104491	0.00185617	2	15	0	0	9	15	10	11	12	5	11	16	21	9	31	25	21	6	15	16	16
IPI00008934,	HMGCS2 Hydroxymethylglutaryl-CoA synthase, mitochondrial	508	0.305118	8.27907	10	0.000199584	0.000252309	0	0	0	0	0	0	0	0	9.05355e-05	0	0	0.000280804	0	0	0	6.33586e-05	0.000138469	0	0.000539687	0.000553994	0	5	6	0	0	0	0	0	0	0	0	3	0	0	10	0	0	0	2	4	0	16
IPI00306439,	C18orf55 TIM21-like protein, mitochondrial	248	0.217742	10.1729	5	0	0	0	0	0	0	0	0	0.000131499	6.26528e-05	6.18172e-05	0	0	0	0.00012159	0.000168278	0	0.000259566	0.000212728	0.000196991	0.000276372	0.000354623	0.000146311	0	0	0	0	0	0	0	0	2	1	1	0	0	0	2	3	0	4	3	3	4
IPI00019884,	ACTN2 Alpha-actinin-2	894	0.651007	5.12757	59	0.0292372	0.027336	0.0141738	0.0210689	0.0279609	0.0176102	0.0247582	0.0201898	0.0269394	0.0149817	0.0186575	0.025224	0.0169999	0.0232003	0.020575	0.0145957	0.0187333	0.0178572	0.0187855	0.0203831	0.0225401	0.0154841	0.017899	1289	1144	531	822	1099	655	899	797	1477	862	1088	1440	1028	1454	1220	938	1080	992	955	1119	1176
IPI00013195,	MRPL49 39S ribosomal protein L49, mitochondrial	166	0.23494	9.8688	3	0.000122155	0	0.000143754	0	0	0	0	0	0	0	0	0	8.90603e-05	0	0	0.000167602	0	0.000193893	0.000105937	9.81001e-05	0.000103223	0.00010596	0.000218585	1	0	1	0	0	0	0	0	0	0	0	0	1	0	0	2	0	2	1	1	1
IPI00420108,	DLST Dihydrolipoyllysine-residue succinyltransferase component of 2-oxoglutarate dehydrogenase complex, mitochondrial	453	0.399558	9.38654	16	0.0021934	0.00216923	0.00347676	0.00384436	0.00256073	0.00185708	0.00244575	0.00274964	0.00244768	0.0025382	0.00355347	0.00235072	0.00287195	0.00321195	0.00166414	0.00245669	0.00222507	0.00259337	0.00194101	0.00201311	0.00347997	0.00287331	0.00276343	49	46	66	76	51	35	45	55	68	74	105	68	88	102	50	80	65	73	50	56	92
IPI00020599,	CALR Calreticulin	417	0.146283	4.04337	7	0.000194511	0	0.000686711	0.000164852	0	0.00017292	0.000354253	0	0.000195514	0.000186306	0.000147057	0.00030043	0.000283626	0.000307874	0.000216937	0.000200158	0.000297497	0	0	0.000117155	0	0	0	4	0	12	3	0	3	6	0	5	5	4	8	8	9	6	6	8	0	0	3	0
IPI00028881,IPI00871897,	NDUFA3 NADH dehydrogenase [ubiquinone] 1 alpha subcomplex subunit 3	84	0.214286	8.9209	2	0	0.000762935	0.00113634	0.000545581	0.00108311	0.00114456	0.00117241	0	0	0	0	0.000932138	0.001408	0.00152838	0.0017949	0.00149047	0.00203068	0.000766337	0.000837407	0.000969322	0	0.00062819	0.00086393	0	3	4	2	4	4	4	0	0	0	0	5	8	9	10	9	11	4	4	5	0
IPI00217963,	KRT14 Keratin, type I cytoskeletal 14; KRT16 Keratin, type I cytoskeletal 16	473	0.46723	4.69092	20	0.000128612	0	0	0	0.00110601	0	0.00156156	0	0.000689466	0.00160964	0.000324116	0	0.000343814	0.00126665	0.000478133	0.000117641	9.83531e-05	0.00010207	0.000260251	0.000378712	0.00101434	0.00189652	0.00260823	3	0	0	0	23	0	30	0	20	49	10	0	11	42	15	4	3	3	7	11	28
IPI00003968,	NDUFA9 NADH dehydrogenase [ubiquinone] 1 alpha subcomplex subunit 9, mitochondrial	377	0.655172	10.372	23	0.00134468	0.000736627	0.00544359	0.00583497	0.00458526	0.00369783	0.00391839	0.0038446	0.0052767	0.00387417	0.00455447	0.00386306	0.00435285	0.00469188	0.00343934	0.00416961	0.00361967	0.00482366	0.00522435	0.00462189	0.00495417	0.00438566	0.00332052	25	13	86	96	76	58	60	64	122	94	112	93	111	124	86	113	88	113	112	107	109
IPI00028883,IPI00642807,	NDUFB8 NADH dehydrogenase [ubiquinone] 1 beta subcomplex subunit 8, mitochondrial	170.5	0.419893	6.01034	7	0.00202183	0.00187937	0.00237932	0.0028223	0.00186765	0.00239654	0.00216603	0.0014611	0.00200835	0.0017315	0.00152857	0.00119401	0.00156077	0.00158963	0.00159172	0.00212133	0.00100045	0.00179336	0.00216596	0.00219675	0.00221098	0.00185694	0.00244738	17	15	17	21	14	17	15	11	21	19	17	13	18	19	18	26	11	19	21	23	22
IPI00001663,	HTRA2 Isoform 1 of Serine protease HTRA2, mitochondrial	458	0.259825	10.4825	8	0	0	0	0	0	0	0	0	3.56023e-05	0	0	0	0	3.11459e-05	0	0	0	7.02755e-05	7.67928e-05	3.55559e-05	7.48256e-05	7.68092e-05	0	0	0	0	0	0	0	0	0	1	0	0	0	0	1	0	0	0	2	2	1	2
IPI00031522,	HADHA Trifunctional enzyme subunit alpha, mitochondrial	763	0.539974	9.51571	41	0.010976	0.011339	0.0101958	0.0115923	0.0105231	0.00967105	0.0109712	0.00911226	0.0122668	0.0117094	0.0132611	0.0128276	0.0130014	0.0144331	0.00938615	0.00931655	0.0124584	0.0101241	0.00931135	0.0101379	0.0102855	0.00958998	0.0092496	413	405	326	386	353	307	340	307	574	575	660	625	671	772	475	511	613	480	404	475	458
IPI00063903,	USMG5 Up-regulated during skeletal muscle growth protein 5	58	0.448276	10.2083	4	0.00244732	0.00626133	0.00534865	0.00513599	0.0058824	0.00538735	0.00466941	0.00429513	0.00618499	0.00401842	0.00449347	0.00728996	0.0107057	0.00959187	0.00935821	0.00815473	0.00882295	0.00443947	0.00485119	0.00533462	0.00384062	0.00485222	0.00437923	7	17	13	13	15	13	11	11	22	15	17	27	42	39	36	34	33	16	16	19	13
IPI00019888,IPI00336008,	ALDH5A1 Succinate-semialdehyde dehydrogenase, mitochondrial	541.5	0.302906	8.26458	14	0.000561711	0.000789001	0.000749168	0.00114255	0.000462046	0.000488263	0.00068201	0.000543697	0.000903373	0.00088952	0.00110415	0.000375954	0.000518737	0.000447834	0.00114157	0.000745003	0.000572742	0.000832145	0.000811891	0.00102249	0.000632874	0.000519721	0.00087111	15	20	17	27	11	11	15	13	30	31	39	13	19	17	41	29	20	28	25	34	20
IPI00448095,IPI00797249,	DCXR L-xylulose reductase	243	0.522643	8.2333	9	0.00033379	0.00017582	9.82025e-05	0.000188596	0.000187204	0.000197826	0.000202638	9.31978e-05	0.000134205	0.000127884	0.000126178	6.44441e-05	0.000121679	0	0.000186137	5.7247e-05	0.00012763	6.62267e-05	0	6.70149e-05	0	0	0	4	2	1	2	2	2	2	1	2	2	2	1	2	0	3	1	2	1	0	1	0
IPI00013706,	MRPL20; LOC642393 39S ribosomal protein L20, mitochondrial	149	0.348993	11.4602	4	0	0	0	0	0	0	0	0	0	0	0.000308671	0	0	0	0	0	0	0.000324022	0.000354072	0.000327878	0.000230001	0.000354147	0.000365286	0	0	0	0	0	0	0	0	0	0	3	0	0	0	0	0	0	3	3	3	2
IPI00016801,	GLUD1 Glutamate dehydrogenase 1, mitochondrial	558	0.224014	7.90902	12	3.63401e-05	0	4.27656e-05	8.21305e-05	8.15243e-05	0	0	0	0.000116888	0.000111383	0.000164846	8.41931e-05	0.000132473	5.11284e-05	0.000189139	0.000149581	2.77903e-05	0.000144203	6.30307e-05	0.000175103	0	0	0	1	0	1	2	2	0	0	0	4	4	6	3	5	2	7	6	1	5	2	6	0
IPI00168603,	CHDH Choline dehydrogenase, mitochondrial	594	0.274411	8.36345	8	0	0	0	0	0	0	0	0	0	7.84742e-05	0	0.000158181	0.000323556	0.000168104	7.61471e-05	0	0.000234955	0	8.88159e-05	0	0	0	0	0	0	0	0	0	0	0	0	0	3	0	6	13	7	3	0	9	0	3	0	0
IPI00219673,	GSTK1 Glutathione S-transferase kappa 1	226	0.544248	8.68559	10	0	0	0	0	0	0	0	0	0.00021645	0.000275007	6.78348e-05	0	0	0	0.000200139	0	0	0.00042725	0.000311249	7.20558e-05	0.000151638	7.78288e-05	0	0	0	0	0	0	0	0	0	3	4	1	0	0	0	3	0	0	6	4	1	2
IPI00784376,IPI00879813,	MTP18 Mitochondrial 18 kDa protein	154.5	0.156205	9.62735	2	0	0.000276533	0	0	0	0	0	0	0	0.000703983	0.000793821	0	0.000478447	0.000461645	0.000487933	0.000720311	0	0.000208325	0.000455289	0.000421608	0.000887253	0.00102462	0.000352282	0	2	0	0	0	0	0	0	0	7	8	0	5	5	5	8	0	2	4	4	8
IPI00828189,	PCMT1 Isoform 2 of Protein-L-isoaspartate(D-aspartate) O-methyltransferase	228	0.0482456	6.50888	1	0	0	0.000209326	0.000201004	0.00019952	0.000210841	0.000323955	0	0.000214551	0.000204446	0.000268959	0	0.000129684	0.000187695	0.000198383	0	0.000136026	0	0.000154259	0	0	0	0	0	0	2	2	2	2	3	0	3	3	4	0	2	3	3	0	2	0	2	0	0
IPI00219217,	LDHB L-lactate dehydrogenase B chain	334	0.245509	5.92622	9	0	0	0	0	0	0	0	0	0	0	0	9.3772e-05	0	0	0	0	0	0.000144549	0.000157954	0.000146269	0.000513026	0.000526626	0	0	0	0	0	0	0	0	0	0	0	0	2	0	0	0	0	0	3	3	3	10
IPI00394809,	APOOL Apolipoprotein O-like	268	0.61194	10.0748	15	0.00287521	0.00119564	0.00391784	0.00504459	0.00449814	0.00215247	0.00238856	0.0020281	0.0029813	0.00266695	0.00526277	0.00333066	0.00286854	0.00388557	0.00185651	0.00238771	0.00225662	0.00222181	0.00275595	0.00498261	0.00581825	0.00492238	0.00541568	38	15	44	59	53	24	26	24	49	46	92	57	52	73	33	46	39	37	42	82	91
IPI00216457,IPI00339274,	HIST1H2AE; HIST1H2AH Histone H2A type 1-H; HIST2H2AA4; HIST1H2AB Histone H2A type 1-B/E; HIST2H2AA3 Histone H2A type 2-A	129.5	0.455605	11.551	4	0.00031317	0.000164959	0.000184272	0.000176945	0.000175639	0	0	0	0	0	0	0.000241852	0	0	0	0	0	0	0	0	0.000264634	0	0.00042029	2	1	1	1	1	0	0	0	0	0	0	2	0	0	0	0	0	0	0	0	2
IPI00017726,	HSD17B10 Isoform 1 of 3-hydroxyacyl-CoA dehydrogenase type-2	261	0.716475	7.93684	12	0.00132077	0.000900322	0.00320005	0.00298502	0.00305013	0.00174974	0.00160364	0.00130156	0.00312373	0.00214316	0.00311313	0.00185999	0.00158602	0.0018036	0.00127087	0.00159897	0.00136652	0.00172646	0.00208871	0.00124786	0.0020352	0.00222394	0.00145974	17	11	35	34	35	19	17	15	50	36	53	31	28	33	22	30	23	28	31	20	31
IPI00434580,IPI00479390,	MYOM1 Isoform 1 of Myomesin-1	1637	0.229886	6.85381	28	0	0.000260992	0	0	0	0.00010278	0	4.15035e-05	0	4.74585e-05	0	0	0	2.6142e-05	0.000313147	0.000203949	0.000331549	0.000206448	0.000397474	0.0002288	0	0.000193407	0.000155159	0	20	0	0	0	7	0	3	0	5	0	0	0	3	34	24	35	21	37	23	0
IPI00063408,	DHTKD1 Probable 2-oxoglutarate dehydrogenase E1 component DHKTD1, mitochondrial	919	0.10555	6.9321	5	4.41301e-05	0	0	0	0	0	0	0	0	0	0	5.11205e-05	4.82612e-05	0	0	0	0	0.000105069	0.000153084	0	0	5.74189e-05	0	2	0	0	0	0	0	0	0	0	0	0	3	3	0	0	0	0	6	8	0	0
IPI00643286,	SDR39U1 Isoform 2 of Epimerase family protein SDR39U1	293	0.327645	9.4368	8	0.000553659	0.000437451	0.00114022	0.00148592	0.000931548	0.00106644	0.000756263	0.000850231	0.000667817	0.000848486	0.000680201	0.00117583	0.00095869	0.000730281	0.000874782	0.000712168	0.000899724	0.000988654	0.00108034	0.000944841	0.000935704	0.00120064	0.000928799	8	6	14	19	12	13	9	11	12	16	13	22	19	15	17	15	17	18	18	17	16
IPI00003870,	CLPP Putative ATP-dependent Clp protease proteolytic subunit, mitochondrial	277	0.314079	8.21343	6	0.00014641	0.00015424	0.000258446	0	0	0	0	0	0.000412062	0	0.000221382	0.000508806	0.000106744	0	0.00016329	0	0.000111964	0.000174293	0.000253943	0.000117578	0.000247438	0.000126999	0.000130993	2	2	3	0	0	0	0	0	7	0	4	9	2	0	3	0	2	3	4	2	4
IPI00009896,	EPHX1 Epoxide hydrolase 1	455	0.334066	7.27888	13	0.000178266	0	0.000209786	0	0	0	0.000108222	9.95476e-05	0.000179185	6.82985e-05	0.000370632	0.000103252	0.000129969	0.000282162	9.94096e-05	0.000275163	0.000136325	0	0	0.000143162	0	0	0.000279116	4	0	4	0	0	0	2	2	5	2	11	3	4	9	3	9	4	0	0	4	0
IPI00007765,	HSPA9 Stress-70 protein, mitochondrial	679	0.519882	6.00916	36	0.0031656	0.00333489	0.00309273	0.0037122	0.00334982	0.00240713	0.00264698	0.00260158	0.00307386	0.0029062	0.0027094	0.00267533	0.00250392	0.00252103	0.00217608	0.00301166	0.00278624	0.00263083	0.00235683	0.00266214	0.00224598	0.00212419	0.00248491	106	106	88	110	100	68	73	78	128	127	120	116	115	120	98	147	122	111	91	111	89
IPI00018871,IPI00789069,	ARL8A ADP-ribosylation factor-like protein 8A; ARL8B cDNA FLJ56285, highly similar to ADP-ribosylation factor-like protein 8B	207.5	0.403907	9.07906	6	9.77241e-05	0.00010295	0.000115003	0	0	0	0	0	0	0	0	0	7.12482e-05	6.87462e-05	0	0	0	0.000155114	0.000169499	7.84801e-05	0.000165157	8.47678e-05	8.74339e-05	1	1	1	0	0	0	0	0	0	0	0	0	1	1	0	0	0	2	2	1	2
IPI00217493,	MB Myoglobin	154	0.584416	7.86325	9	0	0	0.000309912	0.000148795	0.000147697	0	0.000159874	0.000294118	0	0	0	0.000305063	0	0.000463144	0	0	0	0.000209001	0.000228384	0.000422977	0.000222533	0.000114216	0.000117809	0	0	2	1	1	0	1	2	0	0	0	3	0	5	0	0	0	2	2	4	2
IPI00027233,IPI00793065,	SCO1 Protein SCO1 homolog, mitochondrial	285.5	0.182675	9.64788	4	0	0	0.000501503	0.000240782	0.000159337	0	0	0	0	0	0	0	0.000258914	0	0	0	0	0.000225472	0.000184787	0.000171117	0.000120036	0.000123218	0	0	0	6	3	2	0	0	0	0	0	0	0	5	0	0	0	0	4	3	3	2
IPI00027252,	PHB2 Prohibitin-2	299	0.642141	10.4065	20	0.00237365	0.0023577	0.00494822	0.00682067	0.00699855	0.00651139	0.00592869	0.00522625	0.00447185	0.00478089	0.00410185	0.00555168	0.00563671	0.00496168	0.00408444	0.00451294	0.00409717	0.0039829	0.00376413	0.00381245	0.00447002	0.00423555	0.00442945	35	33	62	89	92	81	72	69	82	92	80	106	114	104	81	97	79	74	64	70	78
IPI00745906,	SUOX Sulfite oxidase, mitochondrial	545	0.266055	6.03357	9	0.000111621	0.000195983	0.000262714	0.000168179	0	0	0.000180701	0	0.000478704	0.000370629	0.000309426	0.000287338	0.00024414	0.00052348	0.00024898	0.000382872	0.000597518	0.000324815	0.000290404	0.0002988	0.000251524	0.000129096	0.000266313	3	5	6	4	0	0	4	0	16	13	11	10	9	20	9	15	21	11	9	10	8
IPI00013847,	UQCRC1 Cytochrome b-c1 complex subunit 1, mitochondrial	480	0.454167	6.32196	22	0.00168981	0.00164667	0.0029829	0.00262561	0.00260623	0.00150224	0.00251335	0.00217034	0.00217412	0.00197461	0.00258705	0.00185962	0.0022176	0.00211001	0.00210451	0.00286915	0.00197068	0.00251454	0.00241801	0.00284981	0.00139222	0.0013192	0.00181425	40	37	60	55	55	30	49	46	64	61	81	57	72	71	67	99	61	75	66	84	39
IPI00003925,IPI00549885,	PDHB Isoform 1 of Pyruvate dehydrogenase E1 component subunit beta, mitochondrial	350	0.56323	6.16678	16	0.00220158	0.0014038	0.00886347	0.00595774	0.00461404	0.00398309	0.00429101	0.00485294	0.0051247	0.00435061	0.0045116	0.00416107	0.00578688	0.00468702	0.0043939	0.00560415	0.00456349	0.00588547	0.00643129	0.00521108	0.00582592	0.00547781	0.00383585	38	23	130	91	71	58	61	75	110	98	103	93	137	115	102	141	103	128	128	112	119
IPI00007052,	FIS1 Mitochondrial fission 1 protein	152	0.526316	9.24165	7	0.00160088	0.000702704	0.00188394	0.00165828	0.0014964	0.00237196	0.00178175	0.00193692	0.00118003	0.00122668	0.000302579	0.00195749	0.00175074	0.00253388	0.0011903	0.0018304	0.00183636	0.00137638	0.00115694	0.000857085	0.000901846	0.00115719	0.00107423	12	5	12	11	10	15	11	13	11	12	3	19	18	27	12	20	18	13	10	8	8
IPI00305978,	AKR7A2 Aflatoxin B1 aldehyde reductase member 2	359	0.220056	7.18465	7	0	0	0.000398828	0.000319142	0	0	0	0	0.000181681	0.000173124	0.000213519	0	0.000205905	0	0.000419976	7.74987e-05	0.00034556	0.00035862	0.000293909	0.000272166	0.00052503	0.000587944	0.000252682	0	0	6	5	0	0	0	0	4	4	5	0	5	0	10	2	8	8	6	6	11
IPI00001091,	AFG3L2 AFG3-like protein 2	797	0.247177	8.9836	20	0	0.000268032	0	0	8.56159e-05	9.04738e-05	0	0.000142077	0.00022505	0.000194955	0.000250061	0.00013754	0.000166946	0.000143185	7.56694e-05	0.000418901	0.00011674	0.000464418	0.000286841	0.000286053	0.000107497	0.000110347	0.000204872	0	10	0	0	3	3	0	5	11	10	13	7	9	8	4	24	6	23	13	14	5
IPI00168479,	APOA1BP cDNA FLJ56357, highly similar to Homo sapiens apolipoprotein A-I binding protein (APOA1BP), mRNA	307	0.136808	8.93078	3	0	0	0	0	0	0	0	0	0.000159341	0	0.000149811	5.10095e-05	4.81564e-05	4.64653e-05	0	4.53127e-05	0	0	0	0	0.000111629	0.000114588	0.000118192	0	0	0	0	0	0	0	0	3	0	3	1	1	1	0	1	0	0	0	0	2
IPI00294911,	SDHB Succinate dehydrogenase [ubiquinone] iron-sulfur subunit, mitochondrial	280	0.421429	8.91943	13	0.00152083	0.00152587	0.00426129	0.00229144	0.00268069	0.00334785	0.00246205	0.00363971	0.00361059	0.00277463	0.00350415	0.00363534	0.0023232	0.00275107	0.00199233	0.00322934	0.0021599	0.00258639	0.00320308	0.00244269	0.00305983	0.00288967	0.00291576	21	20	50	28	33	39	28	45	62	50	64	65	44	54	37	65	39	45	51	42	50
IPI00747849,IPI00871221,	ATP1B1 Isoform 1 of Sodium/potassium-transporting ATPase subunit beta-1	302	0.201989	8.80797	4	0	0	0.000474103	0.000303502	0.000301262	0.000238767	0.000407625	0.000224971	0.000377951	0.0002058	0	0.000362978	0.000146861	0.000283407	0.000299545	0.000276378	0.000205391	0.000159865	0.000174691	0	0.000170216	0	0.000240298	0	0	6	4	4	3	5	3	7	4	0	7	3	6	6	6	4	3	3	0	3
IPI00170692,IPI00374657,IPI00640416,IPI00871804,	VAPA Vesicle-associated membrane protein-associated protein A	268	0.0638944	9.16806	2	0	0	0.000445209	0	0.000254612	0	0	0	0	0	0	0.000175298	0	0	0.000225032	0.000207627	0.000231448	0.000120098	0.000131236	0.000121527	0	0.000131263	0.000135392	0	0	5	0	3	0	0	0	0	0	0	3	0	0	4	4	4	2	2	2	0
IPI00026570,IPI00872879,	COX7A2 Cytochrome c oxidase polypeptide 7A2, mitochondrial	99	0.238554	9.67846	2	0	0.000863119	0	0	0	0	0	0.000457517	0	0	0	0.000790905	0.00119467	0.00115271	0.00152294	0.00224824	0.000939818	0.000487669	0.000355264	0.000493473	0	0	0	0	4	0	0	0	0	0	2	0	0	0	5	8	8	10	16	6	3	2	3	0
IPI00294779,	VDAC3 Isoform 1 of Voltage-dependent anion-selective channel protein 3; VDAC3 Isoform 2 of Voltage-dependent anion-selective channel protein 3	284	0.552817	8.9017	14	0	0	0	8.06845e-05	0	8.46333e-05	0	7.97432e-05	5.74151e-05	0	5.39813e-05	5.51406e-05	0	5.02283e-05	5.30885e-05	0	0	0.000226663	6.1921e-05	0.000401381	0.000301674	0.000123868	0.000191646	0	0	0	1	0	1	0	1	1	0	1	1	0	1	1	0	0	4	1	7	5
IPI00024913,	C21orf33 Isoform Long of ES1 protein homolog, mitochondrial	268	0.414179	8.39571	11	0.00242122	0.00183332	0.00329455	0.00265055	0.00432839	0.00269058	0.00248043	0.00278863	0.00273793	0.00313077	0.00366106	0.0026879	0.00314436	0.00212908	0.00315044	0.00259534	0.00214089	0.00306249	0.00360897	0.00309894	0.00383621	0.00485675	0.00250475	32	23	37	31	51	30	27	33	45	54	64	46	57	40	56	50	37	51	55	51	60
IPI00024145,IPI00216026,IPI00455531,IPI00737171,IPI00902560,	VDAC2 Isoform 2 of Voltage-dependent anion-selective channel protein 2	294.4	0.380735	7.57303	11	0	0	8.10571e-05	7.78342e-05	0.000309039	0.000244931	0.000334518	0.000230779	0.00016616	0.000263891	0.000156223	0.000106385	0.000150652	0.000145362	0.000358491	0.000189008	0.000421386	0.000163992	0.000238934	0.000110629	0.000465627	0.000537717	0.000616255	0	0	1	1	4	3	4	3	3	5	3	2	3	3	7	4	8	3	4	2	8
IPI00009865,	KRT10 Keratin, type I cytoskeletal 10; KRT14 Keratin, type I cytoskeletal 14; KRT16 Keratin, type I cytoskeletal 16; KRT9 Keratin, type I cytoskeletal 9	593	0.512648	4.87551	37	0.0184996	0.0250726	0.0112274	0.00911939	0.0138466	0.0163752	0.0186419	0.0177969	0.0320618	0.0231103	0.0223109	0.0211792	0.0204682	0.0227564	0.0200096	0.0222858	0.0269346	0.0227691	0.0221525	0.0226282	0.0139277	0.0153944	0.0163987	541	696	279	236	361	404	449	466	1166	882	863	802	821	946	787	950	1030	839	747	824	482
IPI00024976,	TOMM22 Mitochondrial import receptor subunit TOM22 homolog	142	0.43662	3.98992	3	0	0	0	0	0	0	0	0	0	0.000437687	0	0.000771968	0.000520564	0.000602739	0	0.00117558	0	0.00067999	0.00061921	0.000917443	0.000844687	0.00111482	0.000638822	0	0	0	0	0	0	0	0	0	4	0	7	5	6	0	12	0	6	5	8	7
IPI00220059,	NDUFB4 NADH dehydrogenase [ubiquinone] 1 beta subcomplex subunit 4	129	0.48062	10.2421	7	0	0	0.000184986	0.000177631	0.00035264	0.000186325	0.000190857	0.000526676	0	0	0	0.000485579	0.000687628	0.00033174	0	0.000323512	0	0.000124753	0.000136322	0.000126237	0	0	0	0	0	1	1	2	1	1	3	0	0	0	4	6	3	0	3	0	1	1	1	0
IPI00554676,IPI00816618,	HBG2; HBG1 Hemoglobin subunit gamma-2	149.5	0.153889	7.06275	2	0	0	0	0	0	0.00032155	0.000494058	0	0	0	0	0	0	9.54169e-05	0	0	0	0.000215292	0.000117629	0	0.000229232	0	0	0	0	0	0	0	2	3	0	0	0	0	0	0	1	0	0	0	2	1	0	2
IPI00477131,IPI00910352,	SYPL2 Isoform 1 of Synaptophysin-like protein 2; SYPL2 Isoform 2 of Synaptophysin-like protein 2	240	0.296946	5.30501	6	0	0	0.00019886	0	0	0	0	0	0	0	6.38778e-05	6.52497e-05	6.16e-05	0.000118874	6.28213e-05	0.000115925	6.46125e-05	0	7.32731e-05	0	7.13961e-05	0	0.000151188	0	0	2	0	0	0	0	0	0	0	1	1	1	2	1	2	1	0	1	0	1
IPI00007961,	MT-ND1 NADH-ubiquinone oxidoreductase chain 1	318	0.091195	6.53323	4	0.000573899	0	0.000825457	0.000432347	0.000929839	0.000453507	0.000541962	0.000640955	0.00133318	0.00073292	0.00134987	0.00108339	0.00106928	0.000986875	0.000379299	0.00126861	0.000487642	0.000860322	0.00127191	0.00133145	0.00129321	0.00110625	0.0014263	9	0	11	6	13	6	7	9	26	15	28	22	23	22	8	29	10	17	23	26	24
IPI00021925,IPI00877658,	CPT1B Carnitine palmitoyltransferase 1B isoform a variant	807.5	0.26801	8.86432	19	0.000552459	0.000687823	0.000472831	0.000595916	0.00033801	0.000535784	0.000457348	0.000504826	0.000646177	0.000577259	0.000721443	0.000620579	0.000585868	0.00061829	0.000261399	0.0005685	0.000633723	0.000777251	0.000500889	0.000665501	0.000954896	0.000784167	0.000539221	22	26	16	21	12	18	15	18	32	30	38	32	32	35	14	33	33	39	23	33	45
IPI00178352,IPI00413958,	FLNC Isoform 1 of Filamin-C	2708.5	0.0243686	5.88439	9	6.73804e-05	6.30967e-05	6.16734e-05	0.000109982	0.000109171	4.43712e-05	3.63604e-05	2.50844e-05	7.22431e-05	3.44203e-05	5.66021e-05	7.5163e-05	6.00421e-05	4.74002e-05	7.23657e-05	3.08163e-05	3.43519e-05	1.18834e-05	4.54491e-05	3.60745e-05	4.42848e-05	0	6.02853e-05	9	8	7	13	13	5	4	3	12	6	10	13	11	9	13	6	6	2	7	6	7
IPI00255052,IPI00790752,	NDUFB9 NADH dehydrogenase [ubiquinone] 1 beta subcomplex subunit 9	173.5	0.496176	8.31122	9	0.00444124	0.00320125	0.00233818	0.00290557	0.00249084	0.00207803	0.00212858	0.00182743	0.00244353	0.003224	0.00353445	0.00135388	0.00204505	0.00189102	0.0014773	0.00192429	0.00134066	0.00287542	0.0026353	0.00337894	0.00296284	0.00324414	0.00313704	38	26	17	22	19	15	15	14	26	36	40	15	24	23	17	24	15	31	26	36	30
IPI00914847,	NEB Nebulin	6669	0.0217424	9.49509	11	0	0	0	0	1.7053e-05	3.60412e-06	3.69179e-06	0	9.2911e-05	9.31948e-06	0	6.80968e-05	3.7686e-05	8.5559e-06	3.39117e-05	3.33748e-05	0	0	0	1.22092e-05	1.54162e-05	1.84623e-05	0	0	0	0	0	5	1	1	0	38	4	0	29	17	4	15	16	0	0	0	5	6
IPI00872762,IPI00921173,	SUCLG1 Succinyl-CoA ligase [GDP-forming] subunit alpha, mitochondrial	339.5	0.365377	9.1404	13	0.00071674	0.000692148	0.00274128	0.00276728	0.00254587	0.00169915	0.00195804	0.00200121	0.00244948	0.00210528	0.0020772	0.00193731	0.00222087	0.00218489	0.00213167	0.00208973	0.00182704	0.00184869	0.00258992	0.00230239	0.00227122	0.00269409	0.00213756	12	11	39	41	38	24	27	30	51	46	46	42	51	52	48	51	40	39	50	48	45
IPI00418495,	CD36 Platelet glycoprotein 4	472	0.175847	8.05786	6	0	0	0	0	0	0	0	0	0	0	6.49605e-05	0.000364956	0.000375865	0.000362665	0.000159715	0	0.000164269	0.000102287	0	0.000103504	0	0	0.000230625	0	0	0	0	0	0	0	0	0	0	2	11	12	12	5	0	5	3	0	3	0
IPI00001539,	ACAA2 3-ketoacyl-CoA thiolase, mitochondrial	397	0.609572	8.20716	18	5.10775e-05	0.000107618	0.000180326	0.000173157	0	0	0	0	0.000123218	0.000430521	0.000347547	0.000473348	0.000930983	0.000610837	0.000341799	0.000280323	0.000429665	0.000648588	0.000354369	0.000615288	0.000906389	0.000841806	0.000365593	1	2	3	3	0	0	0	0	3	11	9	12	25	17	9	8	11	16	8	15	21
IPI00154512,	C22orf32 UPF0466 protein C22orf32, mitochondrial	107	0.317757	7.54474	3	0	0	0	0	0	0	0.000460197	0	0	0	0.000286555	0	0	0	0.000563631	0.000390028	0.00028985	0	0	0	0.000320282	0.000493158	0	0	0	0	0	0	0	2	0	0	0	2	0	0	0	4	3	2	0	0	0	2
IPI00022314,IPI00847322,	SOD2 Superoxide dismutase [Mn], mitochondrial	222	0.68018	8.44911	15	0.0137012	0.0103924	0.0109642	0.00815422	0.00768422	0.00725407	0.00876137	0.00724298	0.00653704	0.00769896	0.00600797	0.00529051	0.00552735	0.00501197	0.00427864	0.00595291	0.00419108	0.0111637	0.0109316	0.00828902	0.00710102	0.00768542	0.00645613	150	108	102	79	75	67	79	71	89	110	87	75	83	78	63	95	60	154	138	113	92
IPI00171611,IPI00216402,IPI00219038,IPI00465070,IPI00909530,	HIST2H3C; HIST2H3A; HIST2H3D Histone H3.2	131.4	0.252525	11.9017	5	0.00231481	0.00520236	0.00217929	0.00226703	0.0019041	0.00237798	0.00224845	0.00155117	0.000868654	0.000827742	0.000700031	0.00286026	0.00146265	0.00249689	0.00160639	0.00158801	0.00318637	0.000734844	0.000669161	0.00123932	0.00208646	0.000803165	0.00262335	15	32	12	13	11	13	12	9	7	7	6	24	13	23	14	15	27	6	5	10	16
IPI00556579,IPI00874143,	GSTZ1 glutathione transferase zeta 1 isoform 1	216	0.0601852	7.83997	1	0	0	0	0	0	0	0	0	0.00022647	7.19347e-05	0	0	0	0.000132082	0	6.44028e-05	0	0	0	7.53917e-05	0.000158658	0.000162864	8.39932e-05	0	0	0	0	0	0	0	0	3	1	0	0	0	2	0	1	0	0	0	1	2
IPI00024670,IPI00744902,IPI00852934,IPI00922290,IPI00922887,	REEP5 Receptor expression-enhancing protein 5	171.4	0.105624	7.30701	2	0	0	0	0	0	0	0	0	0.0002854	0	0	0.000730918	0.000345018	0.000416127	0.000175929	0.000405805	0.00036189	0	0	0	0	0	0.000317547	0	0	0	0	0	0	0	0	3	0	0	8	4	5	2	5	4	0	0	0	0
IPI00098902,	OGDH 2-oxoglutarate dehydrogenase E1 component, mitochondrial	1023	0.437928	6.85526	42	0.000158575	6.26457e-05	0	0	4.44678e-05	0	2.4067e-05	0	0.000175332	0.000182263	0.000239776	7.65392e-05	0.000144516	0.000195218	0.000176858	0.000326358	0.000166742	0.000235969	0.000275043	0.000159185	0.000167498	0.000240714	8.86732e-05	8	3	0	0	2	0	1	0	11	12	16	5	10	14	12	24	11	15	16	10	10
IPI00553153,	ATPIF1 Putative uncharacterized protein DKFZp564G0422	107	0.261682	10.2857	7	0	0	0	0.00107077	0.000850291	0	0	0	0.000761957	0.000871284	0.000716387	0	0.000414505	0	0.00140908	0.000650047	0.000869552	0.00135362	0.00131481	0.00136973	0.000480422	0.00180825	0.000508669	0	0	0	5	4	0	0	0	5	6	5	0	3	0	10	5	6	9	8	9	3
IPI00030702,	IDH3A Isoform 1 of Isocitrate dehydrogenase [NAD] subunit alpha, mitochondrial	366	0.338798	6.92491	10	0.000498633	0	0.0010432	0.000626076	0.000310728	0.000394031	0.000336346	0.000618772	0.000133655	0.000806612	0.000544532	0.000470653	0.000646295	0.000623599	0.000453138	0.000456099	0.000423689	0.000527642	0.000432432	0.000622909	0.000702257	0.000961165	0.000594837	9	0	16	10	5	6	5	10	3	19	13	11	16	16	11	12	10	12	9	14	15
IPI00294398,IPI00298406,	HADH Isoform 1 of Hydroxyacyl-coenzyme A dehydrogenase, mitochondrial; HADH Isoform 2 of Hydroxyacyl-coenzyme A dehydrogenase, mitochondrial	352	0.698481	9.626	22	0.00518465	0.00412679	0.00637256	0.00683526	0.00697867	0.00764778	0.0059453	0.0065625	0.00773602	0.0061357	0.00596677	0.00489373	0.006762	0.00615981	0.00655341	0.00652079	0.00704864	0.00370324	0.00649466	0.00610673	0.00778867	0.00829496	0.00726732	90	68	94	105	108	112	85	102	167	139	137	110	161	152	153	165	160	81	130	132	160
IPI00145260,	C1orf69 Putative transferase C1orf69, mitochondrial	356	0.367978	10.2626	9	0.00011392	0	0	0.000257465	0	0	0	0	0.000412227	0.000349166	0.000129191	0.00030792	0.000581393	0.000320558	0.000381163	0.000429835	0.000392031	0.000271232	0.000296386	0.000365946	0.00043319	0.000345857	0.000152887	2	0	0	4	0	0	0	0	9	8	3	7	14	8	9	11	9	6	6	8	9
IPI00295394,	COX11 Cytochrome c oxidase assembly protein COX11, mitochondrial	276	0.268116	9.31848	4	0	0	0	0	0	0	0	0	0.000236317	0.000281484	0.00027773	0.000170217	0.000214261	0.000206737	0.000163882	0.000403218	0.000224739	0.000291541	0.000254863	0.000177007	0.000310418	0.000127459	0	0	0	0	0	0	0	0	0	4	5	5	3	4	4	3	8	4	5	4	3	5
IPI00852925,	ADHFE1 Isoform 1 of Hydroxyacid-oxoacid transhydrogenase, mitochondrial; ADHFE1 Isoform 2 of Hydroxyacid-oxoacid transhydrogenase, mitochondrial	467	0.391863	7.83901	11	0	0	0	0	0	0	0	0	0	0	0.000229796	0	0	0	6.45701e-05	0	9.96167e-05	0	0	0	3.66918e-05	3.76645e-05	0	0	0	0	0	0	0	0	0	0	0	7	0	0	0	2	0	3	0	0	0	1
IPI00024919,IPI00374151,	PRDX3 Thioredoxin-dependent peroxide reductase, mitochondrial	247	0.332425	7.70744	11	0.00779914	0.00588109	0.0063764	0.00565902	0.00607769	0.00554674	0.00588102	0.00513456	0.00686563	0.0097505	0.00552401	0.00450143	0.0041898	0.00410042	0.00421183	0.00428031	0.00452026	0.00684119	0.00533974	0.004681	0.007631	0.00761966	0.00506816	95	68	66	61	66	57	59	56	104	155	89	71	70	71	69	76	72	105	75	71	110
IPI00013968,	COX7C Cytochrome c oxidase subunit 7C, mitochondrial	63	0.380952	10.8779	3	0	0	0.000757562	0	0.000722073	0	0	0	0.000258823	0.000246633	0.000243344	0	0.000469334	0.000226426	0	0	0.000492286	0.000255446	0.000279136	0.000258486	0	0	0	0	0	2	0	2	0	0	0	1	1	1	0	2	1	0	0	2	1	1	1	0
IPI00016457,IPI00514595,	CRAT Isoform 1 of Carnitine O-acetyltransferase	615.5	0.489176	8.41843	28	0.00233911	0.00242949	0.00220991	0.00215928	0.0022542	0.0019916	0.00232005	0.00195011	0.00217235	0.0022215	0.00174354	0.00190819	0.00240195	0.00213219	0.00164121	0.00210191	0.00204073	0.00177795	0.00185713	0.00235472	0.00270041	0.00160033	0.00229914	71	70	57	58	61	51	58	53	82	88	70	75	100	92	67	93	81	68	65	89	97
IPI00306516,	TIMM44 Mitochondrial import inner membrane translocase subunit TIM44	452	0.119469	8.53186	5	0	0	0.000211179	0.000253478	0	0	0	0	0	0.000206255	0.000237422	0.000207875	0.00016354	0.000284034	0	0	0	0	0	7.20558e-05	0.000189547	0.000116743	0.000120415	0	0	4	5	0	0	0	0	0	6	7	6	5	9	0	0	0	0	0	2	5
IPI00024934,	MUT Methylmalonyl-CoA mutase, mitochondrial	750	0.122667	6.92117	7	5.4074e-05	5.69658e-05	0	0	0	0	0	0	0.000152188	4.14344e-05	0	0	0	5.70593e-05	0	5.5644e-05	6.2028e-05	8.58298e-05	0	4.34257e-05	9.1387e-05	7.03572e-05	0	2	2	0	0	0	0	0	0	7	2	0	0	0	3	0	3	3	4	0	2	4
IPI00018206,	GOT2 Aspartate aminotransferase, mitochondrial	430	0.481395	9.37656	25	0.00249935	0.00258333	0.00360723	0.00266446	0.00201005	0.00257128	0.00269108	0.00294939	0.00223732	0.00350506	0.00310179	0.00214869	0.00361005	0.00308518	0.00336606	0.00352628	0.00259652	0.00419169	0.00274007	0.00340841	0.00259019	0.00392692	0.0031222	53	52	65	50	38	46	47	56	59	97	87	59	105	93	96	109	72	112	67	90	65
IPI00295066,IPI00807664,	MRPL48 Isoform 1 of 39S ribosomal protein L48, mitochondrial	203	0.227047	9.17988	4	0	0	0	0	0	0	0	0	0	0.000153083	0.000453123	0	0	0	0	0	0	0.000396381	0.00051977	0.000240659	0.000337637	0.000259941	0.000178744	0	0	0	0	0	0	0	0	0	2	6	0	0	0	0	0	0	5	6	3	4
IPI00375498,IPI00375499,	TTN titin isoform novex-1	27084.5	0.00262143	6.69136	7	0	0	0	5.0762e-06	0	4.4372e-06	4.54514e-06	0	3.01018e-06	4.01578e-06	5.09428e-06	0	8.18771e-06	6.32014e-06	5.01003e-06	6.16338e-06	8.58812e-06	2.37672e-06	5.84356e-06	5.41127e-06	4.42857e-06	3.24712e-06	4.0191e-06	0	0	0	6	0	5	5	0	5	7	9	0	15	12	9	12	15	4	9	9	7
IPI00030363,	ACAT1 Acetyl-CoA acetyltransferase, mitochondrial	427	0.548009	9.21121	22	0.00579365	0.00430246	0.00525326	0.00348814	0.00399507	0.00641707	0.00570828	0.00355352	0.00420058	0.00516717	0.00373393	0.00531777	0.00796328	0.00527832	0.00575544	0.00465872	0.0060648	0.00670859	0.00370656	0.00488157	0.00505625	0.00411928	0.00361151	122	86	94	65	75	114	99	67	110	142	104	145	230	158	163	143	167	178	90	128	126
IPI00025796,	NDUFS3 NADH dehydrogenase [ubiquinone] iron-sulfur protein 3, mitochondrial	264	0.67803	7.61726	21	0.0031492	0.00202294	0.00786401	0.00737774	0.00878795	0.00528061	0.00634166	0.00669118	0.00784411	0.00635641	0.00807183	0.00551656	0.006552	0.00551141	0.00474016	0.0046897	0.00452288	0.00384039	0.004463	0.00444126	0.00473811	0.00486371	0.00494797	41	25	87	85	102	58	68	78	127	108	139	93	117	102	83	89	77	63	67	72	73
IPI00218015,IPI00329133,	LDHD Isoform 2 of Probable D-lactate dehydrogenase, mitochondrial	495.5	0.260483	6.54795	9	0	0.000129337	0	0	0	0	0	0	9.87238e-05	0	0	9.48129e-05	8.95096e-05	0.000143944	0.000182569	0.000393046	0	0.000227349	0.000141962	0.000230055	0.000207488	7.09962e-05	0	0	3	0	0	0	0	0	0	3	0	0	3	3	5	6	14	0	7	4	7	6
IPI00291006,	MDH2 Malate dehydrogenase, mitochondrial	338	0.698225	8.90167	22	0.0063593	0.00385531	0.0168031	0.0146435	0.0111035	0.0124446	0.0120189	0.0148077	0.0174154	0.0164573	0.0174171	0.0170962	0.0185019	0.0172613	0.0128022	0.0142814	0.015874	0.0153313	0.0161808	0.0127675	0.0152593	0.0188383	0.0145462	106	61	238	216	165	175	165	221	361	358	384	369	423	409	287	347	346	322	311	265	301
IPI00015141,	CKM Creatine kinase M-type; CKMT2 Creatine kinase, sarcomeric mitochondrial	419	0.403341	8.30684	18	0.00406523	0.00305902	0.00558137	0.00415631	0.0039085	0.00441709	0.00475958	0.00578338	0.00400836	0.00667499	0.00450041	0.0023546	0.00462221	0.00357472	0.00543352	0.00604249	0.00418208	0.00572284	0.00512037	0.00582982	0.0050301	0.00604501	0.00420006	84	60	98	76	72	77	81	107	103	180	123	63	131	105	151	182	113	149	122	150	123
IPI00003031,IPI00551022,	ISOC2 Isoform 2 of Isochorismatase domain-containing protein 2, mitochondrial	213	0.465445	7.88387	6	0.00199922	0.00170496	0.00168051	0.00182885	0.00213571	0.00191836	0.00242738	0.00191384	0.00252626	0.00408508	0.00244715	0.00205858	0.00222107	0.00214307	0.0018404	0.00202461	0.00232969	0.00234219	0.00173379	0.00175843	0.00193071	0.00132126	0.00127764	21	17	15	17	20	17	21	18	33	56	34	28	32	32	26	31	32	31	21	23	24
IPI00456965,	COQ5 Isoform 1 of Ubiquinone biosynthesis methyltransferase COQ5, mitochondrial	327	0.501529	6.94355	13	0.000496092	0.000391967	0.000510833	0.00112119	0.00166938	0.00147008	0.0018823	0.00103886	0.000698111	0.000712748	0.00178155	0.000718345	0.00103985	0.000872467	0.00106047	0.00110607	0.00118555	0.000787429	0.00107557	0.000846601	0.00146722	0.00139854	0.000998672	8	6	7	16	24	20	25	15	14	15	38	15	23	20	23	26	25	16	20	17	28
IPI00032871,IPI00874115,	MSRB2 Similar to Methionine-R-sulfoxide reductase B2, mitochondrial precursor	200	0.175004	9.05561	4	0	0	0	0.000229144	0.000341179	0	0	0	0.000326118	0.000310758	0.00022996	0	0	0	0	0.00013911	0	0.000402327	0.000439639	0.000325692	0.000428377	0.000439733	0.000362851	0	0	0	2	3	0	0	0	4	4	3	0	0	0	0	2	0	5	5	4	5
IPI00220487,	ATP5H Isoform 1 of ATP synthase subunit d, mitochondrial	161	0.813665	4.93985	19	0.0177588	0.0119416	0.0124504	0.0095358	0.00946543	0.00612094	0.0094812	0.00815857	0.0106343	0.0105194	0.0121884	0.005836	0.00881531	0.00673371	0.00543151	0.00760353	0.00616428	0.00789661	0.00917507	0.0093055	0.0108558	0.010925	0.0092403	141	90	84	67	67	41	62	58	105	109	128	60	96	76	58	88	64	79	84	92	102
IPI00014230,	C1QBP Complement component 1 Q subcomponent-binding protein, mitochondrial	282	0.312057	4.46932	6	0.000503349	0.000454515	0.00135394	0.00138136	0.00120986	0.00093757	0	0	0.0010408	0.00115708	0.00103292	0.00066638	0.00104851	0.000859937	0.00101583	0.00157855	0.00115478	0.000798948	0.000748321	0.000750709	0.000972202	0.00106035	0.00141537	7	6	16	17	15	11	0	0	18	21	19	12	20	17	19	32	21	14	12	13	16
IPI00027255,	MYL6B Myosin light chain 6B	208	0.543269	5.43927	15	0.000487446	0.00390271	0	0.000220331	0	0.000924457	0	0.000435521	7.83936e-05	0.000149403	7.37052e-05	0	0.000213231	0	0.000362431	0.00013376	0.000447317	0.00116056	0.0010991	0.00101779	0.000988562	0.00152215	0.000348895	5	38	0	2	0	8	0	4	1	2	1	0	3	0	5	2	6	15	13	13	12
IPI00021439,IPI00021440,IPI00894365,IPI00894498,	ACTB Actin, cytoplasmic 1	369	0.168159	5.18466	4	0.00016486	0.000347353	0	0	0	0	0	0	8.83787e-05	0.000126324	0.00012464	0.000339511	0.000200325	0.00019329	0.000163438	7.53984e-05	0.000210122	8.72254e-05	0.000238287	0	0.000185746	0	0.000393334	3	6	0	0	0	0	0	0	2	3	3	8	5	5	4	2	5	2	5	0	4
IPI00745872,	ALB Isoform 1 of Serum albumin; ALB Putative uncharacterized protein ALB	609	0.297208	6.2144	22	6.65936e-05	0.00014031	3.91842e-05	3.76263e-05	7.46972e-05	0	0	0	8.03245e-05	5.10276e-05	0	0	0	4.68467e-05	0	0	2.54631e-05	0	0	8.02198e-05	0	0	0	2	4	1	1	2	0	0	0	3	2	0	0	0	2	0	0	1	0	0	3	0
IPI00026182,IPI00873113,	CAPZA2 F-actin-capping protein subunit alpha-2	286	0.426573	6.30022	7	0	0.000298772	0	0.000160241	0.000556703	0.000672332	0.000516515	0.000475113	0.00102624	0.000434627	0.000750453	0.000985589	0.00087877	0.000598524	0.00110706	0.000875518	0.00119285	0.000168809	0.000491903	0.000341635	0.000599128	0.000676512	0.00069779	0	4	0	2	7	8	6	6	18	8	14	18	17	12	21	18	22	3	8	6	10
IPI00256376,	ECHDC3 Isoform 1 of Enoyl-CoA hydratase domain-containing protein 3, mitochondrial	303	0.359736	8.82076	7	0	0	0	0.00015125	0.000150134	0	0	0	0	0.000307681	0.000455367	0.000310098	0.000292753	0.000235393	0.000149278	0	0	0	0	0	0.000282757	0.000464404	0.000239505	0	0	0	2	2	0	0	0	0	6	9	6	6	5	3	0	0	0	0	0	5
IPI00015833,IPI00926408,IPI00926903,	CHCHD3 Coiled-coil-helix-coiled-coil-helix domain-containing protein 3, mitochondrial	228.667	0.371759	8.52943	13	0	0	0	0	0	0	0.00010767	0	7.13085e-05	6.795e-05	0.000134087	0	0	0	0	0	0	7.03779e-05	7.69048e-05	0	0	0	0	0	0	0	0	0	0	1	0	1	1	2	0	0	0	0	0	0	1	1	0	0
IPI00440493,	ATP5A1 ATP synthase subunit alpha, mitochondrial	553	0.667269	9.56074	41	0.0227712	0.0151428	0.0280921	0.0261464	0.0249663	0.0184289	0.0211924	0.0251862	0.026626	0.0272264	0.0299406	0.0230226	0.0277768	0.0247893	0.0229292	0.0235959	0.0192926	0.0298289	0.0245816	0.0265324	0.0242928	0.024237	0.0234573	621	392	651	631	607	424	476	615	903	969	1080	813	1039	961	841	938	688	1025	773	901	784
IPI00008483,	MAOA Amine oxidase [flavin-containing] A; MAOB Amine oxidase [flavin-containing] B	527	0.313093	7.96125	13	0	0	0.000316968	0.000347847	0.00025896	0	9.34366e-05	0	0.000402232	0.000383288	0.000203633	0.000534874	0.000364691	0.000514292	0	7.91898e-05	5.88501e-05	0	0.000133477	0	0	0	0.000103278	0	0	7	8	6	0	2	0	13	13	7	18	13	19	0	3	2	0	4	0	0
IPI00017334,	PHB Prohibitin	272	0.827206	5.45988	19	0.00305657	0.00235612	0.00947509	0.00808743	0.0078605	0.0105157	0.00941374	0.0104077	0.00539533	0.00599809	0.00642536	0.00673607	0.00597883	0.00524442	0.00454531	0.00444948	0.00416181	0.00425993	0.00433173	0.00472972	0.00466175	0.004268	0.00493584	41	30	108	96	94	119	104	125	90	105	114	117	110	100	82	87	73	72	67	79	74
IPI00009867,	KRT1 Keratin, type II cytoskeletal 1; KRT2 Keratin, type II cytoskeletal 2 epidermal; KRT5 Keratin, type II cytoskeletal 5; KRT6A Keratin, type II cytoskeletal 6A; KRT6B Keratin, type II cytoskeletal 6B; KRT6C Keratin, type II cytoskeletal 6C; KRT79 Keratin, type II cytoskeletal 79	590	0.408475	7.90961	29	0.000206215	0.000434485	0	7.76759e-05	0.000192757	0.000122216	0.000166919	0.000191924	0.00254261	0.00173814	0.00135118	0.000318507	0.00052621	0.00072533	0.000511089	0.000613028	0.000893624	0.00163659	0.00137108	0.00220808	0.000638935	0.000924184	0.00107625	6	12	0	2	5	3	4	5	92	66	52	12	21	30	20	26	34	60	46	80	22
IPI00020928,	TFAM Transcription factor A, mitochondrial	246	0.353658	10.3194	10	0	8.68382e-05	0	0	0	0	0	0	0	0	0	0	0	0	0	0	0	0.000130838	0.000285944	0.000397186	0.00013931	0.000214504	7.37502e-05	0	1	0	0	0	0	0	0	0	0	0	0	0	0	0	0	0	2	4	6	2
IPI00005587,IPI00793379,	MYOM2 Myomesin-2	1464	0.36612	6.07825	41	0.00015236	0.000685808	0	3.13038e-05	0	9.85077e-05	8.40866e-05	6.18772e-05	6.68273e-05	0.000169813	0	0	4.03935e-05	6.82062e-05	0.000762095	0.000522613	0.000561387	0.000351761	0.000720719	0.000344825	7.02257e-05	0.000468568	0.000198279	11	47	0	2	0	6	5	4	6	16	0	0	4	7	74	55	53	32	60	31	6
IPI00024983,IPI00410134,	RTN2 Isoform RTN2-A of Reticulon-2	375	0.31215	7.4956	9	0.000324444	5.69658e-05	0.000254541	6.1105e-05	0.000121308	0	0.000262619	0	4.34823e-05	0	4.08818e-05	4.17598e-05	0.000118272	0.000190198	4.02057e-05	3.7096e-05	4.1352e-05	0	0	8.68513e-05	0	0	0	6	1	4	1	2	0	4	0	1	0	1	1	3	5	1	1	1	0	0	2	0
IPI00023334,	MRPL4 Isoform 1 of 39S ribosomal protein L4, mitochondrial	311	0.205788	10.1754	4	0	0	0	0	0	0	0	0	0	0	0.000147884	0	0	0	0	0.000357839	0	0.000103492	0.000339271	0.000104724	0.000220387	0.000169672	0.000116672	0	0	0	0	0	0	0	0	0	0	3	0	0	0	0	8	0	2	6	2	4
IPI00026519,	PPIF Peptidyl-prolyl cis-trans isomerase, mitochondrial	207	0.289855	9.94971	5	0.00186124	0.00134159	0.0018445	0.00287814	0.00175809	0.00139338	0.00154622	0.00131287	0.00189054	0.00247706	0.00207371	0.00121043	0.00157125	0.00186063	0.00116538	0.00154567	0.00119861	0.0020991	0.00254863	0.00243876	0.00240056	0.00203934	0.00219113	19	13	16	26	16	12	13	12	24	33	28	16	22	27	16	23	16	27	30	31	29
IPI00029744,	SSBP1 Single-stranded DNA-binding protein, mitochondrial	148	0.527027	10.0411	8	0	0	0.00112867	0.000774135	0.00107579	0.000324809	0.000499065	0.000153021	0	0	0	0.000317431	0.0011987	0.000867456	0.0011206	0.000657953	0.000314331	0.00108737	0.000594107	0.00132037	0.000578887	0.000831927	0.000858093	0	0	7	5	7	2	3	1	0	0	0	3	12	9	11	7	3	10	5	12	5
IPI00017816,	ATP5S ATP synthase subunit s, mitochondrial	215	0.237209	7.62528	5	0.000471576	0.000298077	0.000443967	0.000639472	0	0.000447179	0.000458057	0	0.00106178	0.000794962	0.00114089	0.000509858	0.000687628	0.000398088	0.000280505	0.000452917	0.000432754	0.00097307	0.000736139	0.000605939	0.000637584	0.000736297	0.000590687	5	3	4	6	0	4	4	0	14	11	16	7	10	6	4	7	6	13	9	8	8
IPI00021304,	KRT2 Keratin, type II cytoskeletal 2 epidermal; KRT6A Keratin, type II cytoskeletal 6A	645	0.675969	8.17386	40	0.00782816	0.010797	0.00236782	0.00198947	0.00394957	0.00588786	0.00687085	0.00670634	0.0149913	0.00951546	0.0102918	0.00898321	0.00843491	0.0102176	0.00848526	0.00992103	0.0131269	0.00835842	0.0123235	0.0136084	0.00613675	0.00575402	0.0071445	249	326	64	56	112	158	180	191	593	395	433	370	368	462	363	460	546	335	452	539	231
IPI00642732,IPI00922697,	- cDNA FLJ52314, highly similar to Pyruvate dehydrogenase E1 component alpha subunit, somatic form, mitochondrial; PDHA1 Mitochondrial PDHA1	378	0.530441	8.26466	24	0	0	0	0	0	6.3587e-05	0	5.99129e-05	8.62745e-05	4.11056e-05	4.05573e-05	0	0	0	3.98866e-05	0.000184008	0	4.25743e-05	4.65226e-05	8.6162e-05	4.53309e-05	0	4.79961e-05	0	0	0	0	0	1	0	1	2	1	1	0	0	0	1	5	0	1	1	2	1
IPI00004902,	ETFB Isoform 1 of Electron transfer flavoprotein subunit beta	255	0.509804	8.31346	17	0	0	0.000561487	0.000808743	0.000535183	0.00056555	0.000772409	0.000799308	0.000511557	0.000243732	0.000601203	0.000491292	0.000289882	0.000223762	0.00029563	0.000109106	0.000182435	0.000441771	0.000344815	0.000702474	0.000671963	0.000758755	0.000426883	0	0	6	9	6	6	8	9	8	4	10	8	5	4	5	2	3	7	5	11	10
IPI00384297,	CBR4 Isoform 1 of Carbonyl reductase 4	237	0.253165	9.93139	4	0	0	0.000100689	9.66852e-05	9.59717e-05	0	0	0	0.000137602	0.000196682	6.46864e-05	6.60756e-05	6.23798e-05	0	6.36166e-05	0.000117392	0	6.79033e-05	0	6.87115e-05	0.000289199	7.42165e-05	0.000153102	0	0	1	1	1	0	0	0	2	3	1	1	1	0	1	2	0	1	0	1	4
IPI00329600,	SCCPDH Probable saccharopine dehydrogenase	429	0.289044	9.53426	8	0.000141802	4.97953e-05	0.00011125	5.34135e-05	0.000106039	0	5.73906e-05	5.27904e-05	0.000152036	0.000217313	0.000178679	0.00010951	0.000103385	0.000133005	7.02896e-05	9.72798e-05	7.22937e-05	7.5026e-05	8.19839e-05	0.000113878	0.000119826	0	0	3	1	2	1	2	0	1	1	4	6	5	3	3	4	2	3	2	2	2	3	3
IPI00294073,IPI00645720,	COQ7 Ubiquinone biosynthesis protein COQ7 homolog	205.5	0.522317	7.84312	12	0.00503244	0.00530157	0.00394817	0.00457173	0.00354185	0.00304104	0.0029952	0.0022041	0.00460214	0.00483905	0.00447611	0.00274334	0.00237407	0.00312369	0.00212767	0.00230158	0.00181104	0.00415053	0.00444987	0.00340749	0.00350206	0.00308134	0.00220712	51	51	34	41	32	26	25	20	58	64	60	36	33	45	29	34	24	53	52	43	42
IPI00296053,IPI00759715,	FH Isoform Mitochondrial of Fumarate hydratase, mitochondrial	488.5	0.531223	8.30526	23	0.002034	0.00227397	0.00307755	0.00337735	0.00335243	0.00250937	0.00337682	0.00343067	0.00247008	0.00260821	0.00326385	0.0031416	0.00290535	0.00297853	0.00296296	0.00353115	0.0029522	0.00296495	0.00248394	0.00290023	0.00238523	0.00241245	0.00289686	49	52	63	72	72	51	67	74	74	82	104	98	96	102	96	124	93	90	69	87	68
IPI00152981,	ACAD9 Acyl-CoA dehydrogenase family member 9, mitochondrial	621	0.257649	8.0494	12	3.26534e-05	3.43997e-05	0	0	0	0	0	0	0	2.50208e-05	0	0	0	0	0	8.96039e-05	0	0	2.83181e-05	0.000131116	2.75927e-05	5.66484e-05	2.9215e-05	1	1	0	0	0	0	0	0	0	1	0	0	0	0	0	4	0	0	1	5	1
IPI00000690,	AIFM1 Isoform 1 of Apoptosis-inducing factor 1, mitochondrial	613	0.500816	9.39405	29	3.30795e-05	3.48486e-05	0	0	0	0	4.0164e-05	0	7.98004e-05	2.53473e-05	5.00185e-05	2.55464e-05	2.41175e-05	2.32705e-05	0	4.53867e-05	2.52969e-05	2.6253e-05	0	0	0	2.86938e-05	0	1	1	0	0	0	0	1	0	3	1	2	1	1	1	0	2	1	1	0	0	0
IPI00333838,	ACOT1 Acyl-coenzyme A thioesterase 1	421	0.244656	7.36925	9	0.000240829	0.000152225	0.000340093	0.000217714	0.000216107	0.000171277	0.000292406	0.000215174	0.000193657	0.000369071	0.000218489	7.43939e-05	0.000245815	6.77664e-05	0.000322314	0.000429556	0.000110501	0.000420484	0.000375938	0.000348127	0	0	0.000129282	5	3	6	4	4	3	5	4	5	10	6	2	7	2	9	13	3	11	9	9	0
IPI00007309,IPI00640747,IPI00787101,	TIMM23 Mitochondrial import inner membrane translocase subunit Tim23	212.333	0.227538	8.88726	3	0.000572998	0.000402427	0	0	0	0	0	0	0.000230381	0	0.000361005	0	0	0	0	0	0	0.000227375	0.000248462	0.000230081	0.000242097	0.000165676	0.000170887	6	4	0	0	0	0	0	0	3	0	5	0	0	0	0	0	0	3	3	3	3
IPI00012912,	CPT2 Carnitine O-palmitoyltransferase 2, mitochondrial	658	0.384499	8.30267	19	0.000462259	0.00048698	0.000543994	0.000766135	0.00038024	0.000109586	0	6.88361e-05	0.000892115	0.000661187	0.000815461	0.000547383	0.00110094	0.000628693	0.000252049	0.00078223	0.000612739	0.000538067	0.000668144	0.000841454	0.000833317	0.000935602	0.000799595	15	15	15	22	11	3	0	2	36	28	35	23	49	29	11	37	26	22	25	34	32
IPI00298547,	PARK7 Protein DJ-1	189	0.460317	6.78125	8	0.000858318	0.00101725	0.000757562	0.000606201	0.000962764	0.000381522	0.00052107	0.000359477	0.000862745	0.000575478	0.000811147	0.00049714	0.000625778	0.000528327	0.000398866	0.000588826	0.000328191	0.000766337	0.000558272	0.000689296	0.000634632	0.000744521	0.000479961	8	9	6	5	8	3	4	3	10	7	10	6	8	7	5	8	4	9	6	8	7
IPI00018246,IPI00220663,IPI00220665,IPI00220667,IPI00903226,	HK1 Isoform 1 of Hexokinase-1	922.2	0.228867	6.84353	20	0.00028585	0	0.000621033	7.45426e-05	9.86567e-05	0	8.00929e-05	0	5.30445e-05	0.000219033	9.97441e-05	8.49052e-05	0	0.000185619	0	0.00036203	0	0	7.62765e-05	7.06338e-05	9.29032e-05	3.81464e-05	0.000196731	13	0	24	3	4	0	3	0	3	13	6	5	0	12	0	24	0	0	4	4	5
IPI00026964,	UQCRFS1 Cytochrome b-c1 complex subunit Rieske, mitochondrial	274	0.620438	8.46511	18	0.0155414	0.0154369	0.0138476	0.0108718	0.013697	0.00614055	0.00763776	0.00892658	0.0163059	0.0179763	0.0201425	0.00920163	0.0111689	0.0112453	0.0067682	0.0102048	0.00758372	0.0126865	0.0153392	0.0117677	0.0151339	0.0120044	0.0104618	210	198	159	130	165	70	85	108	274	317	360	161	207	216	123	201	134	216	239	198	242
IPI00026516,	OXCT1 Succinyl-CoA:3-ketoacid-coenzyme A transferase 1, mitochondrial	520	0.301923	7.52129	10	0.000155983	0.000123243	0	0	0	0	0	0	0	0	0	9.03457e-05	0.000398031	0	0.000376928	0	0.000238569	0.000340431	0.000574912	0.000438432	0.000988562	0.000372082	0	4	3	0	0	0	0	0	0	0	0	0	3	14	0	13	0	8	11	17	14	30
IPI00008495,	MT-ND4L; MT-ND4 NADH dehydrogenase subunit 4	460	0.115217	9.54807	4	0	0	0	0	0	0	0	0	0.00014179	6.75561e-05	0.000299948	0	9.64174e-05	0	0	0.000302413	0	0.000104955	0.000152918	0.000212408	0.000223501	0.000267664	0.000157761	0	0	0	0	0	0	0	0	4	2	9	0	3	0	0	10	0	3	4	6	6
IPI00011107,	IDH2 Isocitrate dehydrogenase [NADP], mitochondrial	452	0.429204	8.95225	25	0.00879301	0.00628578	0.0114036	0.0103419	0.00785014	0.00808286	0.00947782	0.0104718	0.00901873	0.012891	0.0122442	0.00970084	0.012658	0.0117085	0.0108409	0.0097254	0.0107726	0.0143129	0.0095709	0.0105562	0.00989437	0.00898923	0.010155	196	133	216	204	156	152	174	209	250	375	361	280	387	371	325	316	314	402	246	293	261
IPI00784044,IPI00789428,	MCCC2 Isoform 1 of Methylcrotonoyl-CoA carboxylase beta chain, mitochondrial	544	0.257667	7.7664	9	0	0	0	0	0	0	0	0	0.000239792	0.000228499	5.63628e-05	0	0	0	5.54306e-05	0.000102287	0	8.87486e-05	0.000161632	0.00023948	0.000283485	0.000226333	6.67005e-05	0	0	0	0	0	0	0	0	8	8	2	0	0	0	2	4	0	3	5	8	9
IPI00013957,	SLC25A20 Mitochondrial carnitine/acylcarnitine carrier protein	301	0.365449	9.83609	11	6.7368e-05	0	0.000317119	0.000152255	7.55657e-05	7.98534e-05	0.000327183	0.000225718	0	0.000154863	0.000305595	0	9.82326e-05	0	0.00020036	0	0.000103037	0.000374258	0.00046739	0.000270509	0.000569271	0.00046749	0.000180823	1	0	4	2	1	1	4	3	0	3	6	0	2	0	4	0	2	7	8	5	10
IPI00009368,	SFXN1 Sideroflexin-1	322	0.332298	9.40556	7	0	0	0	0	0	0	0	0	0	0	0	0	0	0	0	0.000345615	0	0.000149936	0.000163841	0.00015172	0.000212858	0.000163876	0.000112687	0	0	0	0	0	0	0	0	0	0	0	0	0	0	0	8	0	3	3	3	4
IPI00470674,	CYB5R1 NADH-cytochrome b5 reductase 1	305	0.514754	9.82386	19	0.00731329	0.0063036	0.00727632	0.0108937	0.0073829	0.00977196	0.0100097	0.00839055	0.00882121	0.00804914	0.00733862	0.00472365	0.00620444	0.00813797	0.00761271	0.00711514	0.00737218	0.00743975	0.00738017	0.00843597	0.00848326	0.00761242	0.00713805	110	90	93	145	99	124	124	113	165	158	146	92	128	174	154	156	145	141	128	158	151
IPI00305166,	SDHA cDNA FLJ61478, highly similar to Succinate dehydrogenase (ubiquinone) flavoprotein subunit, mitochondrial	668	0.0748503	7.50804	6	0.000546407	0.000831462	0.00042868	0.000411636	0.000544797	0.000467764	0.000479142	0.000474639	0.00043938	0.000325645	0.000252451	0.000210987	0.000354108	0.0002349	0.000225705	0.000333198	0.000232141	0.00050592	0.000447537	0.000487563	0.000230862	0.000236982	0.000298754	18	26	12	12	16	13	13	14	18	14	11	9	16	11	10	16	10	21	17	20	9
IPI00298423,IPI00913991,	PDHX Pyruvate dehydrogenase protein X component, mitochondrial; PDHX pyruvate dehydrogenase complex, component X isoform 2	493.5	0.395228	7.65243	14	0.00131487	0.000779168	0.00116052	0.00106795	0.00115224	0.000633164	0.000947904	0.000963705	0.00105732	0.00113346	0.001429	0.000793309	0.00110843	0.000809352	0.000580477	0.00109935	0.000439915	0.00143484	0.00131847	0.00122093	0.00111109	0.00103362	0.0012867	32	18	24	23	25	13	19	21	32	36	46	25	37	28	19	39	14	44	37	37	32
IPI00023064,	NDUFAF4 Protein HRPAP20	175	0.382857	9.34537	6	0.000579365	0.000854488	0	0	0	0	0	0	0	0.000266364	0.000262812	0	0	0	0	0.000476949	0	0.000551763	0.000703422	0.00055833	0.000881232	0.000603062	0.000311015	5	7	0	0	0	0	0	0	0	3	3	0	0	0	0	6	0	6	7	6	9
IPI00412713,	SAMM50 Sorting and assembly machinery component 50 homolog	469	0.38806	6.90067	15	0	0	0	0	0	0	0	0	0	3.31298e-05	0.000130752	3.339e-05	0.00012609	0.000152077	6.42948e-05	0.000148305	6.61279e-05	3.43136e-05	7.49917e-05	6.9444e-05	7.30707e-05	3.75039e-05	0.00011605	0	0	0	0	0	0	0	0	0	1	4	1	4	5	2	5	2	1	2	2	2
IPI00017895,	GPD2 Isoform 1 of Glycerol-3-phosphate dehydrogenase, mitochondrial	727	0.475928	7.77299	26	8.36771e-05	2.9384e-05	3.28242e-05	0	0	0	3.3866e-05	0	0	0	0	0.000107702	2.03356e-05	5.88645e-05	0	0	0	2.21363e-05	0	0	0	0	0	3	1	1	0	0	0	1	0	0	0	0	5	1	3	0	0	0	1	0	0	0
IPI00337541,	NNT NAD(P) transhydrogenase, mitochondrial	1086	0.44291	8.21102	45	0.00278212	0.00194738	0.00312023	0.00403006	0.00328822	0.0025231	0.00174566	0.00306549	0.00405395	0.00404901	0.00374091	0.0032733	0.00366197	0.00334948	0.00262392	0.00377877	0.00237032	0.00382322	0.00353007	0.00314896	0.00380253	0.00364419	0.00350823	149	99	142	191	157	114	77	147	270	283	265	227	269	255	189	295	166	258	218	210	241
IPI00171152,IPI00171692,	ABHD11 Isoform 4 of Abhydrolase domain-containing protein 11	311.5	0.221537	9.76514	4	0	0	0	0	0	0	0	0	0	0	0.000196863	0	0	0	9.68034e-05	0.000223291	0	0.000309979	0.000225818	0	0.000165025	0.000282333	0.000116485	0	0	0	0	0	0	0	0	0	0	4	0	0	0	2	5	0	6	4	0	3
IPI00001589,	TIMM13 Mitochondrial import inner membrane translocase subunit Tim13	95	0.368421	8.32425	3	0	0	0.00125596	0.00144722	0.00167597	0.00126505	0.00129582	0.00119195	0	0.000654227	0.000322751	0.000824206	0.00108935	0.00120125	0.00158707	0.00248934	0.00130585	0.000508203	0.000370222	0.000514251	0.000541108	0.000370301	0	0	0	5	6	7	5	5	5	0	4	2	5	7	8	10	17	8	3	2	3	3
IPI00032959,	GPD1L Glycerol-3-phosphate dehydrogenase 1-like protein	351	0.37037	7.03407	10	0	0	0.000135973	0	0	0	0	0	0	0	0	8.92303e-05	4.21197e-05	0.000121922	0	0	0.000132539	9.16985e-05	0.000250506	0.00018558	0.000341725	0.000551232	0.000103376	0	0	2	0	0	0	0	0	0	0	0	2	1	3	0	0	3	2	5	4	7
IPI00006663,	ALDH1B1 Aldehyde dehydrogenase X, mitochondrial; ALDH2 Aldehyde dehydrogenase, mitochondrial	517	0.462282	7.0541	23	0.00176499	0.00177674	0.00115393	0.00146262	0.00114386	0.00130175	0.00133341	0.00109512	0.00164005	0.00147264	0.00124543	0.00199914	0.00165855	0.00148994	0.00239134	0.00110319	0.00221957	0.0013385	0.00132657	0.00148042	0.00135887	0.0010887	0.00136859	45	43	25	33	26	28	28	25	52	49	42	66	58	54	82	41	74	43	39	47	41
IPI00020984,	CANX cDNA FLJ55574, highly similar to Calnexin	627	0.119617	4.31184	7	0.000194046	0	0.000304475	0	0	7.66694e-05	0.000117802	0	5.20124e-05	0	2.44508e-05	0.00012488	0.000117895	6.82528e-05	0	8.87465e-05	0.000173124	5.13336e-05	8.41414e-05	0.000103889	0	0	0.000173613	6	0	8	0	0	2	3	0	2	0	1	5	5	3	0	4	7	2	3	4	0
IPI00306720,IPI00796142,	COX7A1 Cytochrome c oxidase polypeptide 7A1, mitochondrial	94	0.272907	10.6583	3	0.0010786	0.00249983	0.00304637	0.00341278	0.0033876	0.00357981	0.00288113	0.00265019	0.00555094	0.00495891	0.00244638	0.0118282	0.0155704	0.0127473	0.00962369	0.0118392	0.00626879	0.00393767	0.00168372	0.00173241	0.00218746	0.0018712	0.00115803	5	11	12	14	14	14	11	11	32	30	15	71	99	84	60	80	38	23	9	10	12
IPI00013860,	HIBADH 3-hydroxyisobutyrate dehydrogenase, mitochondrial	336	0.434524	8.25552	14	0.00144841	0.00152587	0.00319596	0.00402366	0.00365549	0.00286141	0.00307757	0.0033701	0.00266912	0.00360701	0.00310264	0.00247017	0.002244	0.00411812	0.00197438	0.00310514	0.00216913	0.00234691	0.00245988	0.00252024	0.00254986	0.00225101	0.0024838	24	24	45	59	54	40	42	50	55	78	68	53	51	97	44	75	47	49	47	52	50
IPI00006579,	COX4I1 Cytochrome c oxidase subunit 4 isoform 1, mitochondrial	169	0.64497	10.1207	18	0.0118787	0.0073314	0.00847214	0.00840646	0.0100941	0.00796455	0.00655577	0.0116586	0.00781524	0.00717134	0.00689427	0.00732032	0.00901037	0.00987565	0.00678024	0.00880756	0.0049549	0.0110461	0.00998943	0.00925043	0.00750293	0.0110323	0.00794407	99	58	60	62	75	56	45	87	81	78	76	79	103	117	76	107	54	116	96	96	74
IPI00219685,	NDUFA13 NADH dehydrogenase (ubiquinone) 1 alpha subcomplex, 13	227	0.387665	10.2573	14	0.00410915	0.00197624	0.00441522	0.00413872	0.00430858	0.00381186	0.00292844	0.00458927	0.0020113	0.00219037	0.00182347	0.00400121	0.00553586	0.00552998	0.00318811	0.00367692	0.00259589	0.00382831	0.00418335	0.00473474	0.00347231	0.0049591	0.00367646	46	21	42	41	43	36	27	46	28	32	27	58	85	88	48	60	38	54	54	66	46
IPI00019903,	CCDC44 Coiled-coil domain-containing protein 44	297	0.218855	8.23843	5	0	0	0	0	0	0	0	0	0	0.000261581	0.000206474	0.000158181	0.000248889	0.000192119	0.000304588	0.000327869	0	0.000325113	0.000236842	0.000328982	0.000346163	0.00035534	0.000183258	0	0	0	0	0	0	0	0	0	5	4	3	5	4	6	7	0	6	4	6	6
IPI00018278,IPI00218448,	H2AFV Histone H2A.V; HIST1H2AA Histone H2A type 1-A; HIST1H2AE; HIST1H2AH Histone H2A type 1-H; HIST2H2AA4; HIST1H2AB Histone H2A type 1-B/E; HIST2H2AA3 Histone H2A type 2-A	128	0.539062	11.2932	6	0.00063368	0.000500676	0	0.000537056	0	0.000563341	0.000384696	0	0	0	0	0.00220218	0.0003465	0.00156022	0.00058895	0.000434719	0.00133263	0.000251454	0	0.000381671	0.000401603	0	0.000708693	4	3	0	3	0	3	2	0	0	0	0	18	3	14	5	4	11	2	0	3	3
IPI00000335,	HINT2 Histidine triad nucleotide-binding protein 2	163	0.472393	9.6077	5	0.00136844	0.000524225	0.0027816	0.00196811	0.00251175	0.00176951	0.00135942	0.0025009	0	0.000857921	0.000470266	0.00124895	0.00181399	0.0018378	0.00147996	0.0019629	0.00123675	0.0012835	0.00140253	0.00159849	0.0013666	0.00172656	0.00166956	11	4	19	14	18	12	9	18	0	9	5	13	20	21	16	23	13	13	13	16	13
IPI00021841,	APOA1 Apolipoprotein A-I	267	0.531835	5.50143	15	0	0	0	0	0	0	0	0.000254461	0	0	0.000401928	0.000234606	0.000166112	0.000267132	0.00214581	0.000937821	0.00121965	0.00186849	0.00151486	0.00128081	0	0.000527021	0.000543597	0	0	0	0	0	0	0	3	0	0	7	4	3	5	38	18	21	31	23	21	0
IPI00329373,	C19orf70 Protein QIL1	118	0.40678	9.8061	3	0	0	0	0	0	0	0	0	0	0.000526709	0.000519684	0.00199067	0.00150346	0.00217599	0.00127772	0.00282936	0.00210264	0.000818293	0.000745151	0.00151806	0.000435637	0	0.000922502	0	0	0	0	0	0	0	0	0	4	4	15	12	18	10	24	16	6	5	11	3
IPI00646304,	PPIB Peptidyl-prolyl cis-trans isomerase B	216	0.314815	10.0714	8	0.000375514	0	0.000552389	0	0	0	0	0	7.54902e-05	7.19347e-05	0	0.000144999	0	0	0	0	7.17917e-05	0	0.000325658	0.000226175	0.000158658	8.1432e-05	0.000167986	4	0	5	0	0	0	0	0	1	1	0	2	0	0	0	0	1	0	4	3	2
IPI00171573,	CCDC109A Isoform 1 of Coiled-coil domain-containing protein 109A	351	0.290598	8.84269	10	0.000635485	0.000426027	0.000815836	0.000783398	0.000259206	0.00136957	0.0011223	0.000645216	0.00092911	0.00101815	0.000524126	0.000669227	0.000716035	0.000690889	0.00081614	0.00079265	0.000662692	0.000687739	0.000701418	0.000742319	0.000927539	0.000551232	0.000775322	11	7	12	12	4	20	16	10	20	23	12	15	17	17	19	20	15	15	14	16	19
IPI00304071,IPI00909579,	ACSF2 Acyl-CoA synthetase family member 2, mitochondrial	627.5	0.298126	7.75023	13	0.000193891	0.000170217	0.00038029	0.000401687	0.00014499	0.000153217	0.000313888	7.21819e-05	0.00028584	0.000321901	0.000464196	0.000199648	0.000353403	0.000386458	0.000360409	0.000399041	0.000395398	0.000256464	0.000448397	0.00049308	0.000273069	0.000336369	0.000404774	6	5	10	11	4	4	8	2	11	13	19	8	15	17	15	18	16	10	16	19	10
IPI00011416,	ECH1 Delta(3,5)-Delta(2,4)-dienoyl-CoA isomerase, mitochondrial	328	0.628049	8.11923	17	0.00438939	0.00306105	0.00640232	0.00964081	0.00797472	0.00842721	0.00870727	0.00925216	0.00576671	0.00521088	0.00602944	0.00429693	0.00522849	0.00608865	0.00574586	0.00559833	0.00397131	0.00588771	0.00723796	0.00759618	0.00893322	0.00670324	0.00680345	71	47	88	138	115	115	116	134	116	110	129	90	116	140	125	132	84	120	135	153	171
IPI00216293,	TST Thiosulfate sulfurtransferase	297	0.525253	7.28332	12	0	0	0	0.000231459	0	0.000161858	8.28975e-05	7.62528e-05	0.00027451	5.23162e-05	0.000154855	5.2727e-05	0.000149333	9.60595e-05	0.000304588	0.000327869	0.000261061	0.000108371	0.000177632	0.000164491	0.000461551	0.000473786	6.1086e-05	0	0	0	3	0	2	1	1	5	1	3	1	3	2	6	7	5	2	3	3	8
IPI00024920,	ATP5D ATP synthase subunit delta, mitochondrial	168	0.410714	5.19152	5	0.00229332	0.00228881	0.00227269	0.00163674	0.00148927	0.00200299	0.00131896	0.0032353	0.000970588	0.00110985	0.00109505	0.00130499	0.001232	0.00152838	0.00116668	0.00157327	0.00119995	0.00210743	0.00198884	0.00222944	0.0018359	0.00230336	0.00215983	19	18	16	12	11	14	9	24	10	12	12	14	14	18	13	19	13	22	19	23	18
IPI00017510,	MT-CO2 Cytochrome c oxidase subunit 2	227	0.352423	4.43874	8	0.0138461	0.0128926	0.00925093	0.00868122	0.00871736	0.00614132	0.00683301	0.00738275	0.00933817	0.0117732	0.0108058	0.00772648	0.00885738	0.00785508	0.00597771	0.0068023	0.00498683	0.0104215	0.0093738	0.00839339	0.00936013	0.00922083	0.00895138	155	137	88	86	87	58	63	74	130	172	160	112	136	125	90	111	73	147	121	117	124
IPI00022891,	SLC25A4 ADP/ATP translocase 1	298	0.600671	10.2695	16	0.00564783	0.003871	0.0147343	0.0121492	0.0105331	0.00927559	0.00908812	0.0123875	0.0061831	0.0104281	0.00833412	0.00651621	0.00649901	0.00737176	0.00935996	0.00816922	0.00504758	0.00961265	0.00961894	0.0101096	0.00707253	0.0062566	0.00827982	83	54	184	158	138	115	110	163	113	200	162	124	131	154	185	175	97	178	163	185	123
IPI00419263,IPI00639841,	PECI Peroxisomal 3,2-trans-enoyl-CoA isomerase	376.5	0.295459	9.17578	11	0	0	0	0	0	0	0	0	0	8.25387e-05	0.000122157	0	0	0	0	0	0	0.000341951	9.34159e-05	0.000129758	9.10229e-05	0.000280308	0	0	0	0	0	0	0	0	0	0	2	3	0	0	0	0	0	0	8	2	3	2
IPI00465315,IPI00917605,	CYCS Cytochrome c	103	0.641018	10.2148	9	0.00905609	0.0055998	0.010889	0.0106786	0.0121455	0.00676738	0.00717103	0.012313	0.00728223	0.0110123	0.0139911	0.00775394	0.00947325	0.0110795	0.00878279	0.0135058	0.00737712	0.00843715	0.00921961	0.00964429	0.0091498	0.00939235	0.00827863	46	27	47	48	55	29	30	56	46	73	94	51	66	80	60	100	49	54	54	61	55
IPI00219385,	NDUFB6 NADH dehydrogenase [ubiquinone] 1 beta subcomplex subunit 6	128	0.523438	10.1805	8	0.00348524	0.00317095	0.00391506	0.00393841	0.00355395	0.00150224	0.00211583	0.00123851	0.00394908	0.00497698	0.00479084	0.00379264	0.0040425	0.00423487	0.00270917	0.00434719	0.00278641	0.00452618	0.00590765	0.00508894	0.00495311	0.00577149	0.0036852	22	19	21	22	20	8	11	7	31	41	40	31	35	38	23	40	23	36	43	40	37
IPI00645805,IPI00789848,	IVD Isovaleryl-CoA dehydrogenase, mitochondrial	424.5	0.27091	8.22712	8	0	0	0	0	0	0	0	0	0	3.66028e-05	0	0	6.96537e-05	0	0	0	0	7.58214e-05	0.000165706	0	8.07306e-05	0.000165741	0.000128216	0	0	0	0	0	0	0	0	0	1	0	0	2	0	0	0	0	2	4	0	2
IPI00217232,IPI00464979,	SUCLA2 Isoform 2 of Succinyl-CoA ligase [ADP-forming] subunit beta, mitochondrial	452	0.347551	7.29314	14	0.000986971	0.000708922	0.00089751	0.000659042	0.000402572	0.000638121	0.000653643	0.000901875	0.000432899	0.000893773	0.000814018	0.000623625	0.000948531	0.000599628	0.000533704	0.000861744	0.000514613	0.00113933	0.000972652	0.000828642	0.000947736	0.00105069	0.0010436	22	15	17	13	8	12	12	18	12	26	24	18	29	19	16	28	15	32	25	23	25
IPI00220327,	KRT1 Keratin, type II cytoskeletal 1	644	0.625776	8.33707	48	0.0267011	0.0323418	0.0184903	0.0190716	0.027478	0.0261633	0.0295905	0.0271835	0.0383593	0.0362149	0.0338037	0.0289854	0.0275249	0.0281309	0.0245354	0.0279516	0.0311344	0.0299371	0.0296551	0.0313555	0.0199821	0.0219047	0.0251009	848	975	499	536	778	701	774	773	1515	1501	1420	1192	1199	1270	1048	1294	1293	1198	1086	1240	751
IPI00003833,	MTCH2 Mitochondrial carrier homolog 2	303	0.336634	8.03837	8	0.00100385	0.000423014	0.00118135	0.00105875	0.001126	0.000555284	0.000650048	0.000298971	0.000968666	0.00107688	0.00101193	0.00103366	0.0012198	0.00117697	0.00119423	0.00142324	0.00112592	0.000956025	0.00156703	0.00139736	0.00118758	0.000986859	0.00119753	15	6	15	14	15	7	8	4	18	21	20	20	25	25	24	31	22	18	27	26	21
IPI00299193,	SYNJ2BP Synaptojanin-2-binding protein	145	0.524138	6.24965	5	0	0	0	0	0	0	0	0	0.000449817	0	0	0.000431998	0	0	0.000519901	0.000575628	0.00021389	0.000443947	0.000242559	0.000449231	0	0.000727834	0.000500484	0	0	0	0	0	0	0	0	4	0	0	4	0	0	5	6	2	4	2	4	0
IPI00025717,IPI00477773,	MTX2 Metaxin-2	258	0.263665	6.37635	7	0	0	0	0	0	0	0	0	0	0	0.000118842	0	0	0	0	0	0	6.23763e-05	0.000136322	0	0.000199245	0.000136351	0.00021096	0	0	0	0	0	0	0	0	0	0	2	0	0	0	0	0	0	1	2	0	3
IPI00216085,IPI00797738,	COX6B1 Cytochrome c oxidase subunit 6B1	94.5	0.25604	7.25474	4	0	0.00158238	0.00227269	0.0024248	0.00288829	0	0.00208428	0.00143791	0.00120784	0.00180865	0.00178452	0	0.00172089	0.00271711	0.00382911	0.00485781	0.0036101	0.00153268	0.0018609	0.00120627	0.00163191	0.00148904	0.00134389	0	7	9	10	12	0	8	6	7	11	11	0	11	18	24	33	22	9	10	7	9
IPI00009829,	CPA3 Mast cell carboxypeptidase A	417	0.143885	9.38052	6	0	0	0.000286129	0	0	0.00034584	0.000177126	0	0.000156411	7.45223e-05	7.35284e-05	0.000675968	0.000425439	0.000307874	0.000108469	0	7.43741e-05	0.000231555	0.000210858	0.000351467	0	0	0.000261044	0	0	5	0	0	6	3	0	4	2	2	18	12	9	3	0	2	6	5	9	0
IPI00294216,IPI00746318,	SGCD Delta-sarcoglycan	289.5	0.29361	9.51274	7	7.00441e-05	0	8.2429e-05	7.91516e-05	0	0	0	0	5.63243e-05	0	0	0.000108186	0	9.8548e-05	0	4.80519e-05	0	0	0	5.62508e-05	0.000118377	6.07576e-05	0.000376011	1	0	1	1	0	0	0	0	1	0	0	2	0	2	0	1	0	0	0	1	2
IPI00216932,IPI00248961,	ACSS1 Isoform 1 of Acetyl-coenzyme A synthetase 2-like, mitochondrial	688	0.220931	7.16892	9	0.000176841	0.000124199	0	0	0	0	0	0	0	0	2.2283e-05	0	2.14884e-05	0	0	2.02195e-05	2.25392e-05	0.000116956	0.000127802	4.7339e-05	0.000149434	7.66976e-05	0	6	4	0	0	0	0	0	0	0	0	1	0	1	0	0	1	1	5	5	2	6
IPI00479905,	NDUFB10 NADH dehydrogenase [ubiquinone] 1 beta subcomplex subunit 10	172	0.459302	8.65416	10	0.0104926	0.00707933	0.00554958	0.00799339	0.00608304	0.00461153	0.00472371	0.00460842	0.00805813	0.009124	0.00873492	0.00446126	0.00644651	0.00588839	0.00420757	0.00517619	0.00414722	0.00701733	0.00777036	0.00738488	0.00866716	0.00685165	0.00738359	89	57	40	60	46	33	33	35	85	101	98	49	75	71	48	64	46	75	76	78	87
IPI00301028,	TRIM72 Isoform 1 of Tripartite motif-containing protein 72	477	0.331237	6.45307	12	0	0	0	0.000192154	9.53681e-05	0	0.000154846	0	0.000273474	0.000162871	0.000128559	0.00026264	0.000216956	0.000239242	0.000568948	0.000583271	0.000390113	0.000371119	0.000405537	0.000477955	0.000107768	7.37497e-05	0.000494451	0	0	0	4	2	0	3	0	8	5	4	8	7	8	18	20	12	11	11	14	3
IPI00011201,	ME2 NAD-dependent malic enzyme, mitochondrial	584	0.311644	7.67241	16	0.000138889	0.000219475	0.000163447	0.000156948	0.000272632	0.000288101	0.000379426	7.75585e-05	0.000586341	0.000558726	0.000341265	0.000241334	0.000531617	0.000341965	0	0.000762247	0.000531062	0.000303123	0.000331235	0.0003625	0.000234727	0.000271068	0.000279594	4	6	4	4	7	7	9	2	21	21	13	9	21	14	0	32	20	11	11	13	8
IPI00873810,	FKBP1A Peptidyl-prolyl cis-trans isomerase FKBP1A	108	0.25	8.4819	2	0.000563271	0	0.000662867	0	0	0	0	0	0	0	0	0.000579997	0.000410667	0.000528327	0	0	0.000574333	0.00029802	0.000488488	0	0	0	0	3	0	3	0	0	0	0	0	0	0	0	4	3	4	0	0	4	2	3	0	0
IPI00306159,	MECR Trans-2-enoyl-CoA reductase, mitochondrial	373	0.176944	9.00624	6	0	0	0.000575788	6.14327e-05	0	0	6.60068e-05	0	0	0.00012497	0.000164404	8.39674e-05	0.000198177	0.000152974	0.000202106	3.72949e-05	8.31475e-05	0.000302015	0.000235731	0.000130976	0	4.71563e-05	9.7279e-05	0	0	9	1	0	0	1	0	0	3	4	2	5	4	5	1	2	7	5	3	0
IPI00514201,	MYH6 Myosin-6	1939	0.019082	5.47878	2	3.13735e-05	9.9154e-05	0	7.09058e-05	0	4.95841e-05	0.00010158	4.67191e-05	4.20471e-05	4.80801e-05	2.37194e-05	0	2.28737e-05	2.94272e-05	5.44301e-05	5.73946e-05	8.79717e-05	0	0	0	0	5.4428e-05	4.67832e-05	3	9	0	6	0	4	8	4	5	6	3	0	3	4	7	8	11	0	0	0	0
IPI00301204,	RDH13 Retinol dehydrogenase 13	331	0.347432	8.2373	8	0	0	0	0	0	0	0	0	0.00019705	9.38846e-05	0.000277897	9.46219e-05	0.000223323	0.000215481	0.000136651	0.000294191	0.000140547	0.000243098	0.000318771	0.00029519	0.000517676	0.000584539	0.000274057	0	0	0	0	0	0	0	0	4	2	6	2	5	5	3	7	3	5	6	6	10
IPI00005966,	NDUFA12 13kDa differentiation-associated protein variant (Fragment)	146	0.671233	10.1	10	0.00541666	0.00204843	0.00359582	0.00329591	0.00389474	0.00181092	0.00252951	0.00418816	0.00234536	0.00244775	0.00199509	0.00364683	0.00445545	0.00488522	0.0028915	0.0044782	0.00191182	0.00418861	0.00445661	0.00401538	0.00410772	0.00505994	0.00434924	39	14	22	21	25	11	15	27	21	23	19	34	44	50	28	47	18	38	37	36	35
IPI00386271,	SLC25A12 Calcium-binding mitochondrial carrier protein Aralar1	678	0.657817	8.55945	43	0.0058321	0.00655359	0.00915108	0.0091928	0.0100307	0.00889824	0.00856998	0.00801666	0.00822509	0.00763145	0.00755228	0.00755279	0.00811158	0.00749009	0.00535927	0.00771466	0.00658705	0.00436745	0.00474654	0.0058125	0.00396786	0.00430653	0.00652917	195	208	260	272	299	251	236	240	342	333	334	327	372	356	241	376	288	184	183	242	157
IPI00020075,	ABHD10 Abhydrolase domain-containing protein 10, mitochondrial	306	0.284314	8.77166	7	0.000198802	0	0.000389922	0.000149767	0	0	0	0	0.000106574	0.00020311	0.000450902	0.000562938	0.000483137	0.000233085	0.000443445	0.000272765	0.000405412	0.000315551	0.000344815	0.000159653	0.000335982	0.000172444	0.000296447	3	0	5	2	0	0	0	0	2	4	9	11	10	5	9	6	8	6	6	3	6
IPI00305383,	UQCRC2 Cytochrome b-c1 complex subunit 2, mitochondrial	453	0.498896	8.92255	19	0.00402869	0.00301806	0.00837582	0.00571595	0.00482019	0.00519981	0.0060872	0.00579925	0.00449941	0.0070315	0.00544865	0.00515084	0.00704933	0.00604602	0.00565808	0.00657165	0.00599056	0.00692749	0.00559011	0.00535631	0.00491735	0.00508653	0.00716891	90	64	159	113	96	98	112	116	125	205	161	149	216	192	170	214	175	195	144	149	130
IPI00384444,	KRT14 Keratin, type I cytoskeletal 14	472	0.375	4.8074	13	0.000343691	0.000135777	0	0	0.000337324	0	0.000573784	0	0.0019346	0.00121801	0.000844486	0.000265422	0.000595119	0.00123911	0.000383317	0.000618922	0.000657076	0.000204573	0.000670635	0.00106954	0.000508244	0.00122976	0.00123	8	3	0	0	7	0	11	0	56	37	26	8	19	41	12	21	20	6	18	31	14
IPI00005158,IPI00334291,	LONP1 Lon protease homolog, mitochondrial	927	0.214927	6.49157	11	0.000109373	4.60889e-05	0.00010297	0	0	0	0	0	7.03598e-05	0.000100569	0.000148841	0.000168931	0.000191379	0.000184658	9.75865e-05	0.000105045	5.01845e-05	5.20812e-05	3.79408e-05	5.2701e-05	5.54533e-05	0.000132821	7.82849e-05	5	2	4	0	0	0	0	0	4	6	9	10	12	12	6	7	3	3	2	3	3
IPI00299240,IPI00642897,	CACNA1S Voltage-dependent L-type calcium channel subunit alpha-1S	1863.5	0.0729829	6.53782	11	0	0	0.00011525	0	0	0	2.6424e-05	0	0	0	1.64536e-05	0.000201684	9.52015e-05	0.000191372	4.85445e-05	5.22549e-05	0.0001165	0	0	0	0	0	2.92072e-05	0	0	9	0	0	0	2	0	0	0	2	24	12	25	6	7	14	0	0	0	0
IPI00909152,	- cDNA FLJ52895, highly similar to Carbonic anhydrase 3	235	0.0510638	8.47138	1	0	0	0.000203091	9.75081e-05	0	0	0.000104768	0	6.93867e-05	0	0	6.6638e-05	6.29107e-05	0	0	0	0	0	0	0	0.00014583	0.000149696	0	0	0	2	1	0	0	1	0	1	0	0	1	1	0	0	0	0	0	0	0	2
IPI00032875,	ETFDH Isoform 1 of Electron transfer flavoprotein-ubiquinone oxidoreductase, mitochondrial	617	0.311183	7.59358	18	0.00111741	0.00117717	0.00135367	0.00129984	0.00147457	0.00144137	0.00139663	0.00113786	0.00142709	0.00141025	0.0013169	0.00109137	0.00136578	0.00127158	0.000928575	0.00128513	0.00095505	0.00112156	0.00136808	0.00110852	0.00144412	0.0010833	0.00123499	34	34	35	35	40	37	35	31	54	56	53	43	57	55	38	57	38	43	48	42	52
IPI00291643,	SPRYD4 SPRY domain-containing protein 4	207	0.381642	6.94862	7	0.00166532	0.00123839	0.000576406	0.000774883	0.000549403	0.00104504	0	0.000218812	0.00157545	0.00157631	0.00177747	0.00083217	0.00142841	0.000826947	0.000655527	0.000940841	0.000824044	0.00124391	0.00101945	0.00102271	0.00124167	0.00144453	0.000964096	17	12	5	7	5	9	0	2	20	21	24	11	20	12	9	14	11	16	12	13	15
IPI00010810,IPI00895865,	ETFA Electron transfer flavoprotein subunit alpha, mitochondrial	308.5	0.61653	8.71264	14	0.00230056	0.00214661	0.00464114	0.00564504	0.00597202	0.00638879	0.00582593	0.00631328	0.00502126	0.00423074	0.00526759	0.00335026	0.00436092	0.00416154	0.00293234	0.00410341	0.00336781	0.00375592	0.00359122	0.00464521	0.00622084	0.00467528	0.00446947	35	31	60	76	81	82	73	86	95	84	106	66	91	90	60	91	67	72	63	88	112
IPI00470631,	COQ9 Isoform 1 of Ubiquinone biosynthesis protein COQ9, mitochondrial	318	0.393082	5.80222	10	0.000318833	0	0.000825457	0.000936752	0.00035763	0.00105818	0.0010065	0.000925824	0.000871698	0.000390891	0.00115703	0.000443205	0.000325434	0.000807443	0.00123272	0.000481199	0.000926519	0.00131579	0.00188022	0.0016387	0.000916026	0.000774372	0.00057052	5	0	11	13	5	14	13	13	17	8	24	9	7	18	26	11	19	26	34	32	17
IPI00296999,	ATPAF2 ATP synthase mitochondrial F1 complex assembly factor 2	289	0.186851	7.11482	4	0	0	0.000247715	0	0.000314814	0	0	0	0.000564217	0.000376351	0.000530473	0.000216746	0.000153467	9.87185e-05	0	0	0	0.000167056	0.000182549	0.000169045	0.000296454	0.000426039	0.000125554	0	0	3	0	4	0	0	0	10	7	10	4	3	2	0	0	0	3	3	3	5
IPI00061245,	MRPS10 28S ribosomal protein S10, mitochondrial	201	0.278607	8.22043	4	0.000302653	0	0	0	0	0	0	0	0.000243371	0.000541121	0.000457632	0	0	0	0	0	0	0.000480391	0.000262471	0	0.000340996	0.000350036	0	3	0	0	0	0	0	0	0	3	7	6	0	0	0	0	0	0	6	3	0	4
IPI00010845,	NDUFS8 NADH dehydrogenase [ubiquinone] iron-sulfur protein 8, mitochondrial	210	0.42381	6.26866	9	0.00675925	0.00386554	0.00227269	0.00261879	0.00227453	0.00228913	0.00246205	0.00215686	0.0024847	0.00244167	0.0022631	0.00126771	0.0016896	0.00176612	0.00193849	0.00178856	0.00169839	0.00413822	0.00427078	0.00434256	0.00448776	0.0038529	0.00311015	70	38	20	24	21	20	21	20	32	33	31	17	24	26	27	27	23	54	51	56	55
IPI00217143,	SDHA 57 kDa protein; SDHA SDHA protein; SDHA cDNA FLJ61478, highly similar to Succinate dehydrogenase (ubiquinone) flavoprotein subunit, mitochondrial	520	0.392308	7.54562	16	0.000857905	0.00119135	0.000413017	0.000440661	0	0.000462228	0.000473472	0	0.000533077	0.000358567	0.000383267	0.000271037	0.000426462	0.000246891	0.000318939	0.000294271	0.000387675	0.000495172	0.000473457	0.000438432	0.000197712	0.000202954	0.000418674	22	29	9	10	0	10	10	0	17	12	13	9	15	9	11	11	13	16	14	14	6
IPI00217871,IPI00647328,	ALDH4A1 Aldehyde dehydrogenase 4 family, member A1; ALDH4A1 Delta-1-pyrroline-5-carboxylate dehydrogenase, mitochondrial	555	0.59652	8.0151	31	0.00244795	0.00257886	0.00116091	0.00148634	0.00180323	0.00281501	0.00248424	0.00159142	0.00208598	0.00201573	0.0021822	0.00248301	0.00266379	0.00221041	0.00287959	0.00155402	0.00312934	0.00229073	0.00228137	0.00205392	0.00234642	0.00180647	0.00189598	67	67	27	36	44	65	56	39	71	72	79	88	100	86	106	62	112	79	72	70	76
IPI00006721,IPI00107749,IPI00107750,IPI00107751,IPI00107752,IPI00107753,IPI00375149,IPI00375150,IPI00873022,	OPA1 Isoform 1 of Dynamin-like 120 kDa protein, mitochondrial	974.556	0.0831912	7.96283	6	0	0	0	0	0	0	0	0	5.01948e-05	6.37743e-05	3.14619e-05	3.21376e-05	0	0	0	8.56453e-05	0	6.6053e-05	5.41341e-05	5.01294e-05	0	3.60971e-05	3.72324e-05	0	0	0	0	0	0	0	0	3	4	2	2	0	0	0	6	0	4	3	3	0
IPI00218474,	- Enolase; ENO1 Isoform alpha-enolase of Alpha-enolase; ENO3 Beta-enolase	434	0.442396	7.83623	15	0	9.84433e-05	0	0	0	5.53822e-05	0	5.21822e-05	0.000187856	0.000250611	3.53241e-05	3.60828e-05	6.81291e-05	9.86048e-05	0.000451619	0.000192318	0.000535956	7.41617e-05	8.10394e-05	0.000150089	0	0.000121585	0.000167212	0	2	0	0	0	1	0	1	5	7	1	1	2	3	13	6	15	2	2	4	0
IPI00008418,IPI00219865,	DIABLO Diablo homolog, mitochondrial precursor	250.5	0.333487	7.04541	8	0.000647593	0	0.000285787	0.000365898	0.000453998	0	0	0	0.00039056	0.00049622	0.000489602	0.000437603	0.00029509	0.000569454	0	0.000222132	6.19042e-05	0.000642439	0.000491413	0.000455059	0.000273614	0.000210651	0.000217276	8	0	3	4	5	0	0	0	6	8	8	7	5	10	0	4	1	10	7	7	4
IPI00411520,	C14orf159 Isoform 1 of UPF0317 protein C14orf159, mitochondrial; C14orf159 Isoform 2 of UPF0317 protein C14orf159, mitochondrial	621	0.354267	6.86592	18	0	0	0.000153708	0.000184496	0.000146507	0.000193526	0.000158587	0.000109406	0.000183802	0.000125104	0	0	0	0.000114854	0	0.000336015	0	0.000129574	0.000169909	0.000262232	0.000220742	0.000141621	0.000146075	0	0	4	5	4	5	4	3	7	5	0	0	0	5	0	15	0	5	6	10	8
IPI00017469,	SPR Sepiapterin reductase	261	0.375479	8.19442	6	0	0	0	0	0	0	0	0	0	0	5.87382e-05	5.99997e-05	0.000169931	5.46545e-05	0	0.000106598	5.94138e-05	0	0	6.23932e-05	0.000196955	6.7392e-05	0.000139023	0	0	0	0	0	0	0	0	0	0	1	1	3	1	0	2	1	0	0	1	3
IPI00293564,	HMGCL Hydroxymethylglutaryl-CoA lyase, mitochondrial	325	0.218462	8.71219	5	0	0	0	0.000141012	0.000139971	7.39565e-05	0	6.96833e-05	0.000100344	9.56178e-05	9.43426e-05	0.000240922	0.000227446	8.77836e-05	9.27823e-05	8.56062e-05	4.77139e-05	0	5.41094e-05	0	0.000105447	0.000162363	0.000111646	0	0	0	2	2	1	0	1	2	2	2	5	5	2	2	2	1	0	1	0	2
IPI00296190,IPI00646289,IPI00646889,	C10orf58 Uncharacterized protein C10orf58	223.667	0.219165	9.39612	4	0.000181321	0	0	0	0	0	0.000220154	0	0	0	0.000205628	0.000630131	0.000198295	0.000191332	0	0	0.000207993	0.000359756	0.00039312	0.000728075	0.00114915	0.000865048	0.000811142	2	0	0	0	0	0	2	0	0	0	3	9	3	3	0	0	3	5	5	10	15
IPI00107722,	MCEE Methylmalonyl-CoA epimerase, mitochondrial	176	0.426136	9.6815	5	0.000345644	0	0	0.000520782	0.000775408	0	0	0	0.00120441	0.000529701	0.000522637	0.00106772	0.000672	0.000648401	0	0.000553279	0	0.00045719	0.000499589	0.000370105	0.000486792	0.000799514	0.00041233	3	0	0	4	6	0	0	0	13	6	6	12	8	8	0	7	0	5	5	4	5
IPI00019359,	KRT9 Keratin, type I cytoskeletal 9	623	0.64687	4.94897	33	0.0109038	0.0128242	0.00509439	0.00643663	0.00920034	0.00841063	0.00916849	0.00727033	0.0186091	0.0198526	0.0171763	0.0159113	0.0143569	0.0142877	0.00837349	0.0126829	0.0138393	0.0114692	0.0148193	0.0159448	0.0104791	0.011858	0.0129298	335	374	133	175	252	218	232	200	711	796	698	633	605	624	346	568	556	444	525	610	381
IPI00014439,	QDPR Dihydropteridine reductase	244	0.385246	7.45352	6	0	0	9.78e-05	9.39114e-05	9.32184e-05	0	0	0	0.000534619	0.00019104	0.000188492	0.00012836	0.000181771	0.000116925	6.17915e-05	0.000285062	0	6.59553e-05	0.000144144	6.67402e-05	0.000140451	0.000216262	7.43547e-05	0	0	1	1	1	0	0	0	8	3	3	2	3	2	1	5	0	1	2	1	2
IPI00014898,IPI00186711,IPI00398775,IPI00398776,IPI00398777,IPI00398778,IPI00398779,IPI00420096,	PLEC1 Isoform 1 of Plectin-1	4559.5	0.0142576	5.52905	5	4.44737e-06	0	0	0	0	0	0	0	1.07287e-05	0	0	2.74766e-05	9.72739e-06	1.5643e-05	1.98405e-05	9.15298e-06	2.04062e-05	7.05914e-06	7.71381e-06	2.50011e-05	3.7581e-05	3.47196e-05	2.78534e-05	1	0	0	0	0	0	0	0	3	0	0	8	3	5	6	3	6	2	2	7	10
IPI00873817,	ALDH9A1 4-trimethylaminobutyraldehyde dehydrogenase; ALDH9A1 aldehyde dehydrogenase 9A1	494	0.170041	5.61081	7	8.20962e-05	0	4.83061e-05	4.63854e-05	4.60431e-05	0	0	0	6.60157e-05	6.29065e-05	3.10337e-05	6.34005e-05	5.98543e-05	5.77524e-05	0	0	0	3.25771e-05	7.11966e-05	3.29648e-05	3.46864e-05	3.56059e-05	3.67258e-05	2	0	1	1	1	0	0	0	2	2	1	2	2	2	0	0	0	1	2	1	1
IPI00030820,IPI00794978,	MRPL47 Isoform 1 of 39S ribosomal protein L47, mitochondrial	240	0.179478	11.0695	4	0	0	0	0	0	0	0	0	0	0.000323706	0.000447145	0	0.0002464	0	0	0.000289813	0	0.000536436	0.000512912	0.00027141	0.000214188	0.000293155	0.000226782	0	0	0	0	0	0	0	0	0	5	7	0	4	0	0	5	0	8	7	4	3
IPI00024623,	ACADSB Short/branched chain specific acyl-CoA dehydrogenase, mitochondrial	432	0.236111	6.99706	8	0	0	0	0	0	0	0	0	0	0.000107902	0	0	0	0	0	0	0	0.00014901	0.000122122	7.53917e-05	0.000118993	0.00020358	0	0	0	0	0	0	0	0	0	0	3	0	0	0	0	0	0	0	4	3	2	3
IPI00218559,	SGCG Gamma-sarcoglycan	291	0.261168	5.85557	5	0.000209049	0	0.000574029	0	0	0	0	0	0	0	0	0.000376699	0	0.00019608	0	0.000143412	0.000213155	0.000110605	0.000181294	0.000279804	0.000294417	0.000302222	0.000935182	3	0	7	0	0	0	0	0	0	0	0	7	0	4	0	3	4	2	3	5	5
IPI00176469,	CABC1 Isoform 1 of Chaperone activity of bc1 complex-like, mitochondrial	647	0.31221	6.98109	16	0.00285205	0.00264138	0.00276621	0.00322289	0.00284756	0.00226613	0.00266374	0.00255523	0.00317549	0.0026657	0.00329361	0.00217835	0.00217076	0.0028221	0.00244683	0.00236509	0.00249263	0.00238785	0.00318008	0.00309584	0.00293971	0.00318076	0.00316863	91	80	75	91	81	61	70	73	126	111	139	90	95	128	105	110	104	96	117	123	111
IPI00005040,IPI00513827,IPI00895801,	ACADM Medium-chain specific acyl-CoA dehydrogenase, mitochondrial	433.333	0.482851	8.27977	18	0.000701922	0.00073946	0.00104631	0.000423035	0.000682359	0.000721076	0.000454533	0.0004181	0.000940724	0.00143427	0.000636813	0.000939595	0.00126233	0.000691296	0.00100901	0.00128409	0.00118092	0.0013741	0.00109571	0.000638858	0.00126536	0.00170481	0.00150723	15	15	19	8	13	13	8	8	25	40	18	26	37	21	29	40	33	37	27	17	32
IPI00027701,	ACADS Short-chain specific acyl-CoA dehydrogenase, mitochondrial	412	0.446602	8.11741	11	0.000541397	0.0004148	0.000984646	0.000500557	0.000220828	0.000466716	0.000478069	0.000934466	0.000554083	0.000942834	0.000855839	0.000494124	0.000897088	0.000623221	0.000841684	0.000911644	0.000903321	0.000781218	0.00038415	0.000671938	0.00074862	0.00106731	0.000528423	11	8	17	9	4	8	8	17	14	25	23	13	25	18	23	27	24	20	9	17	18
IPI00291972,	RTN4IP1 Isoform 1 of Reticulon-4-interacting protein 1	396	0.20202	9.58025	6	0	0	0.000361564	0	0	0	0	0	0	0.000196186	0.000309711	7.90905e-05	0.000224	0.000252156	0.000152294	0.000175644	0	0.000284474	0.000310856	0.000164491	0	0	0.000137444	0	0	6	0	0	0	0	0	0	5	8	2	6	7	4	5	0	7	7	4	0
IPI00032633,IPI00921877,	- cDNA FLJ50973, highly similar to Ubiquinone biosynthesis monooxygenase COQ6; COQ6 Ubiquinone biosynthesis monooxygenase COQ6	455.5	0.351527	7.43224	13	8.90352e-05	0	0.000261945	0.000201224	0.000299609	0.000158304	0.000108103	9.94383e-05	0.000143191	0.000136447	0.000269254	0.000378176	0.000162283	0.000219218	0.000264801	0.000427561	0.000340439	0.000353306	0.000308857	0.000393262	0.000188091	0	0.00023898	2	0	5	4	6	3	2	2	4	4	8	11	5	7	8	14	10	10	8	11	5
IPI00291328,IPI00646556,	NDUFV2 NADH dehydrogenase [ubiquinone] flavoprotein 2, mitochondrial	250.5	0.475067	8.16312	13	0.0046141	0.0046903	0.00571574	0.00457373	0.00608357	0.00460568	0.00540571	0.00433956	0.00410088	0.00527234	0.00403922	0.00350082	0.00330501	0.00341673	0.00306959	0.00333198	0.0029095	0.00424009	0.00477372	0.00390051	0.00417261	0.00449388	0.00427309	57	55	60	50	67	48	55	48	63	85	66	56	56	60	51	60	47	66	68	60	61
IPI00399053,	NDUFAF3 Uncharacterized protein C3orf60	184	0.375	8.33931	5	0.000440821	0	0.000259383	0	0.000247231	0	0	0	0	0	0	0.000680866	0.000241044	0.000387631	0.000245823	0.000529223	0.000337109	0.000437312	0.000764589	0.000354013	0.000651878	0.000669159	0.000690205	4	0	2	0	2	0	0	0	0	0	0	8	3	5	3	7	4	5	8	4	7
IPI00549970,IPI00909387,	GHITM Growth hormone inducible transmembrane protein	336.5	0.127936	10.4862	4	0	0	0.000141832	0.000272385	0	0	0	0.000201906	0	0	0.000136678	9.30753e-05	0	0	0	0.000165361	0	0.000239125	0.000313561	0.000290365	0.000661979	0.000156814	0.000215662	0	0	2	4	0	0	0	3	0	0	3	2	0	0	0	4	0	5	6	6	13
IPI00305360,	AGMAT Agmatinase, mitochondrial	352	0.196023	7.65732	5	0	0	0.000542345	0.000325489	0.000258469	0.000204851	0.000349724	0	9.2647e-05	0	0	0.000622838	0.000462	0.000202625	0.000299829	0.0001976	0.000352432	0	0	0	0	0	0.000360789	0	0	8	5	4	3	5	0	2	0	0	14	11	5	7	5	8	0	0	0	0
IPI00219729,	SLC25A11 Mitochondrial 2-oxoglutarate/malate carrier protein	314	0.592357	10.4042	15	0.00361642	0.00258523	0.00980367	0.00685972	0.00615716	0.00482248	0.00627275	0.00613058	0.00508909	0.00712566	0.00727475	0.00588494	0.00635618	0.00549696	0.00614609	0.00522771	0.00454345	0.00599647	0.00772868	0.00746811	0.00763984	0.00666601	0.00774236	56	38	129	94	85	63	80	85	98	144	149	118	135	121	128	118	92	117	138	144	140
IPI00889170,	LOC100134308 similar to nebulin	410	0.534146	9.40176	22	0.000791327	0.012661	0	0.000167666	0.0063243	0.00445543	0.00126105	0.00596557	0.00986307	0.00409291	0.00788969	0.00695148	0.00479579	0.00473175	0.0111056	0.00773588	0.0106658	0.00510269	0.00686265	0.00802315	0.0035106	0.00725023	0.00628351	16	243	0	3	114	76	21	108	248	108	211	182	133	136	302	228	282	130	160	202	84
IPI00171769,IPI00552881,	FUNDC2 FUN14 domain-containing protein 2	203.5	0.281528	10.752	6	0	0	0.000117264	0.000112601	0	0.000118112	0.000120986	0.000111288	0.000240381	0.00022906	0	0.000615623	0.000799136	0.000350487	0.000370445	0.000273435	0.000457209	7.90815e-05	8.64155e-05	0.000160045	8.42018e-05	8.6434e-05	8.91525e-05	0	0	1	1	0	1	1	1	3	3	0	8	11	5	5	4	6	1	1	2	1
IPI00419802,IPI00874185,	HIBCH Isoform 1 of 3-hydroxyisobutyryl-CoA hydrolase, mitochondrial; HIBCH Isoform 2 of 3-hydroxyisobutyryl-CoA hydrolase, mitochondrial	400.5	0.31752	8.50185	12	0	0	0.00125125	0	0	0.000240059	0	0.000622017	0.000122141	0.000426759	0.000114837	7.82019e-05	0.000184569	3.56175e-05	0.000338812	0.000104202	0	0.000401825	8.7818e-05	0.000243964	4.27842e-05	4.39184e-05	0	0	0	21	0	0	4	0	11	3	11	3	2	5	1	9	3	0	10	2	6	1
IPI00014581,	TPM1 Isoform 1 of Tropomyosin alpha-1 chain; TPM3 tropomyosin 3 isoform 1	284	0.602113	4.38938	32	0.00221342	0.00270788	0	0.00242054	0.00344383	0.00372387	0.00286084	0.00207332	0.00275592	0.00169604	0.00151147	0.0020402	0.00208225	0.00190868	0.00318531	0.00298793	0.00218409	0	0.00167187	0.00286701	0.0015687	0.00117675	0.00255529	31	36	0	30	43	44	33	26	48	31	28	37	40	38	60	61	40	0	27	50	26
IPI00395341,IPI00478774,	MYOM3 Isoform 1 of Myomesin-3	1438.5	0.32673	6.11888	37	0.000197351	0.000311857	0	4.77881e-05	0	0.000100254	0.000119808	0.000188922	0.000158695	0.000183625	3.19722e-05	0	6.16643e-05	0.000128914	0.000492614	0.000309456	0.000603679	0.000279685	0.000501222	0.000305655	5.95588e-05	0.000440191	0.000227018	14	21	0	3	0	6	7	12	14	17	3	0	6	13	47	32	56	25	41	27	5
IPI00220710,	ACOT9 Isoform 1 of Acyl-coenzyme A thioesterase 9, mitochondrial	439	0.394077	8.82076	16	0	0	0	0	5.18116e-05	0	0	0	0	0	0.000104765	0.000107015	3.36765e-05	6.49878e-05	0.000137377	0.000221816	0.00010597	3.66585e-05	0	3.70948e-05	0	0	4.1327e-05	0	0	0	0	1	0	0	0	0	0	3	3	1	2	4	7	3	1	0	1	0
IPI00414384,	HSDL2 Isoform 1 of Hydroxysteroid dehydrogenase-like protein 2	418	0.578947	8.17594	28	0.00164939	0.00224865	0.00262609	0.00290541	0.00244866	0.00143755	0.00164922	0.00232972	0.00265263	0.0025277	0.00271404	0.00277233	0.00265263	0.00327613	0.0028495	0.00286207	0.00274526	0.00207901	0.00189318	0.00222063	0.00311547	0.00260894	0.00212676	34	44	46	53	45	25	28	43	68	68	74	74	75	96	79	86	74	54	45	57	76
IPI00024742,	UQCRQ Cytochrome b-c1 complex subunit 8	82	0.707317	10.5004	9	0	0	0.00116406	0.00167666	0.00110953	0.00029312	0	0	0.000596556	0.000378973	0.000373919	0.000954873	0.000901464	0.00121773	0.00239028	0.00135717	0.00132377	0.000785028	0.00107229	0.000595779	0.000417928	0.000643511	0.000663751	0	0	4	6	4	1	0	0	3	2	2	5	5	7	13	8	7	4	5	3	2
IPI00025879,	- 227 kDa protein; MYH1 Myosin-1; MYH6 Myosin-6; MYH7 Myosin-7; MYH8 Myosin-8	1939	0.288293	5.47232	54	0.000522892	0.000705096	0.00146453	0	0.00028153	0.00128919	0.00170147	0	0.000311149	0.000657095	0.000339979	0.000839934	0.00154778	0.00207462	0.002947	0.000746129	0.0024952	0.000132795	0.000199527	0.000470314	0.000857195	0.000190498	0.00171227	50	64	119	0	24	104	134	0	37	82	43	104	203	282	379	104	312	16	22	56	97
IPI00012855,IPI00793710,	TMEM11 Transmembrane protein 11	182	0.220446	6.81038	4	0	0.000704248	0.00104893	0	0.000749845	0	0.000946944	0	0.00152308	0.00170746	0.00143199	0.00103252	0.00121846	0	0	0.000917209	0.000852033	0	0.000966239	0.00116319	0.00103564	0.000869801	0.00119621	0	6	8	0	6	0	7	0	17	20	17	12	15	0	0	12	10	0	10	13	11
IPI00465256,	AK3 GTP:AMP phosphotransferase mitochondrial	227	0.797357	9.63533	20	0.00393049	0.00301141	0.00630745	0.00837839	0.00651297	0.00455305	0.00629071	0.00518787	0.00826069	0.00650265	0.00742896	0.00372527	0.00364716	0.00289067	0.00431724	0.00410589	0.00307408	0.00361563	0.00433829	0.00480647	0.00468006	0.00526904	0.00303708	44	32	60	83	65	43	58	52	115	95	110	54	56	46	65	67	45	51	56	67	62
IPI00329572,	PACSIN3 Protein kinase C and casein kinase substrate in neurons protein 3	424	0.25	6.08895	9	0.000382599	0	0.000787936	0.00016213	0.000107289	0.000226754	0.000116135	0	0.000115372	0	0	0.000369338	0.000209208	0.000201861	0.000248915	0.000262472	0.000182866	7.59108e-05	0.000165901	0.000192036	0.000121239	0.000248905	0.000342312	8	0	14	3	2	4	2	0	3	0	0	10	6	6	7	8	5	2	4	5	3
IPI00218733,	SOD1 Superoxide dismutase [Cu-Zn]	154	0.25974	6.06956	3	0.00105339	0.00110972	0	0.000743974	0.000738483	0	0	0	0.000635294	0.000605373	0.000796399	0.000610127	0	0.000555773	0	0	0.000503474	0.000627003	0.000342576	0.000845954	0.000890134	0.00102795	0.000942469	8	8	0	5	5	0	0	0	6	6	8	6	0	6	0	0	5	6	3	8	8
IPI00016513,	RAB10 Ras-related protein Rab-10	200	0.29	8.61141	6	0.000608333	0	0.00119316	0.00114572	0.000909812	0	0.00135413	0.00113235	0.000978352	0	0.000996494	0.00140939	0.00125664	0.00142648	0	0.00125199	0.00116303	0.00112652	0.00140684	0.00113992	0.000771078	0.000615626	0.000725701	6	0	10	10	8	0	11	10	12	0	13	18	17	20	0	18	15	14	16	14	9
IPI00007611,	ATP5O ATP synthase subunit O, mitochondrial	213	0.746479	10.6082	17	0.0169457	0.013038	0.00952287	0.00957456	0.00832926	0.00733489	0.00890039	0.00999448	0.0120189	0.0177993	0.0121638	0.00808728	0.00930074	0.00870623	0.00722003	0.0098618	0.00735309	0.0124665	0.0108981	0.00848635	0.013515	0.0151945	0.00979527	178	130	85	89	78	65	77	94	157	244	169	110	134	130	102	151	101	165	132	111	168
IPI00395769,	ATP5C1 Isoform Heart of ATP synthase subunit gamma, mitochondrial	297	0.535354	9.80391	19	0.00252619	0.00266128	0.00988274	0.0067123	0.00750518	0.00574595	0.00497385	0.00754902	0.00592941	0.00533625	0.00598774	0.00427089	0.00507734	0.00461085	0.00472112	0.00538642	0.00438582	0.00514762	0.00574343	0.00625066	0.00571169	0.00556699	0.00665837	37	37	123	87	98	71	60	99	108	102	116	81	102	96	93	115	84	95	97	114	99
IPI00295992,	ATAD3A Isoform 2 of ATPase family AAA domain-containing protein 3A; ATAD3B TOB3	586	0.363481	9.75894	16	0	0	0	0	0	0	0	0	0	0	0	2.67234e-05	5.04574e-05	0	0	0	0	5.49252e-05	3.00095e-05	2.77894e-05	0	0	0	0	0	0	0	0	0	0	0	0	0	0	1	2	0	0	0	0	2	1	1	0
IPI00027107,	TUFM Tu translation elongation factor, mitochondrial precursor	455	0.494505	7.67644	19	0.00262942	0.00239444	0.00319924	0.00206481	0.00184962	0.00147913	0.00189389	0.00204073	0.0019352	0.00280024	0.00299875	0.00227155	0.00373662	0.00219459	0.00298229	0.00275163	0.0021812	0.00328936	0.00231897	0.00264849	0.00256085	0.00251276	0.00307028	59	51	61	41	37	28	35	41	54	82	89	66	115	70	90	90	64	93	60	74	68
IPI00031064,	TMEM126A Transmembrane protein 126A	195	0.482051	9.61947	9	0.00166382	0.000876397	0.00122375	0.00129261	0.00151635	0.00135587	0.00101007	0.00116139	0.00142154	0.00207172	0.00212271	0.0011243	0.00151631	0.00153621	0.000463912	0.00135543	0.000715708	0.00123793	0.0015331	0.00091862	0.00131808	0.00108242	0.000930387	16	8	10	11	13	11	8	10	17	26	27	14	20	21	6	19	9	15	17	11	15
IPI00029133,	ATP5F1 ATP synthase subunit b, mitochondrial	256	0.578125	9.7935	20	0.0117231	0.00926251	0.00885548	0.00698173	0.00861833	0.00713565	0.00855949	0.00698875	0.0073249	0.00922563	0.00826419	0.00471021	0.0072765	0.00612942	0.00724409	0.0069555	0.0058757	0.010121	0.00920494	0.0106868	0.0102409	0.00920691	0.00772475	148	111	95	78	97	76	89	79	115	152	138	77	126	110	123	128	97	161	134	168	153
IPI00024915,IPI00759663,IPI00876999,	PRDX5 Isoform Mitochondrial of Peroxiredoxin-5, mitochondrial	179	0.454851	7.82277	8	0.00339851	0.00167079	0.00426605	0.00512053	0.00597223	0.00335696	0.00206317	0.003163	0.00437253	0.00486102	0.00453925	0.00446177	0.00396443	0.00422366	0.00454841	0.00598407	0.00476472	0.00449527	0.00412622	0.00491268	0.0043077	0.00510974	0.00425691	30	14	32	40	47	25	15	25	48	56	53	51	48	53	54	77	55	50	42	54	45
IPI00028520,IPI00221298,	NDUFV1 Isoform 1 of NADH dehydrogenase [ubiquinone] flavoprotein 1, mitochondrial	459.5	0.337355	8.29317	17	0.00185346	0.00158066	0.00192152	0.00249341	0.002475	0.00156926	0.00150027	0.00177431	0.0020582	0.00185981	0.00183501	0.00201074	0.00209132	0.00195579	0.00187028	0.00245221	0.00107992	0.00252166	0.00229626	0.00283519	0.0020137	0.00118666	0.00185571	42	34	37	50	50	30	28	36	58	55	55	59	65	63	57	81	32	72	60	80	54
IPI00604664,	NDUFS1 NADH-ubiquinone oxidoreductase 75 kDa subunit	741	0.519568	6.595	34	0.00358487	0.00392073	0.00370346	0.00417469	0.00426666	0.00373026	0.00412004	0.00382036	0.00371888	0.00358567	0.00366198	0.00342363	0.00409004	0.0035999	0.00229921	0.00390485	0.00297165	0.00377894	0.00365476	0.00404368	0.00291366	0.00301463	0.00362361	131	136	115	135	139	115	124	125	169	171	177	162	205	187	113	208	142	174	154	184	126
IPI00927606,	GPX1 glutathione peroxidase 1 isoform 1; GPX1 glutathione peroxidase 1 isoform 2	203	0.349754	6.5029	5	0.000499452	0.00042093	0.000117553	0	0.000224092	0	0	0	0	0	0.000453123	0.000154285	0.000145655	0.00021081	0.000222815	6.85271e-05	0.000229167	0	0	0.000481319	0.000422046	0.000259941	0.000625605	5	4	1	0	2	0	0	0	0	0	6	2	2	3	3	1	3	0	0	6	5
IPI00025239,	NDUFS2 NADH dehydrogenase [ubiquinone] iron-sulfur protein 2, mitochondrial	463	0.578834	7.60578	22	0.0011825	0.000645941	0.00195853	0.0011383	0.00108077	0.00207653	0.00207387	0.00215221	0.00154959	0.00194643	0.0022847	0.00125144	0.00229903	0.00135562	0.00136769	0.0022534	0.00144017	0.00173791	0.00170918	0.00168825	0.00148035	0.00216542	0.00219435	27	14	38	23	22	40	39	44	44	58	69	37	72	44	42	75	43	50	45	48	40
IPI00000181,IPI00101258,	MRPS24 Putative uncharacterized protein MRPS24	165.5	0.102727	9.4382	2	0	0	0	0	0	0	0	0	0	0	0	0	0	0	0	0	0	0.000194478	0	0	0	0	0	0	0	0	0	0	0	0	0	0	0	0	0	0	0	0	0	0	2	0	0	0
IPI00000570,IPI00418174,	C7orf55 15 kDa protein	122.5	0.188891	10.8415	2	0	0	0	0	0	0	0	0	0	0	0	0	0	0	0	0.000454237	0	0	0	0	0	0	0	0	0	0	0	0	0	0	0	0	0	0	0	0	0	0	4	0	0	0	0	0
IPI00000663,IPI00759655,	MLYCD Isoform Mitochondrial of Malonyl-CoA decarboxylase, mitochondrial	473.5	0.0465414	8.76694	2	0	0	0	0	0	0	0	0	0	0	0	0	0	0	0	0	0	0	0	0.000103176	0	0	0	0	0	0	0	0	0	0	0	0	0	0	0	0	0	0	0	0	0	0	3	0
IPI00000821,	MRPL16 39S ribosomal protein L16, mitochondrial	251	0.0796813	10.7936	2	0	0	0	0	0	0	0	0	0	0	0	0	0	0	0	0	0	0	0.000140124	0	0	0	0	0	0	0	0	0	0	0	0	0	0	0	0	0	0	0	0	0	0	2	0	0
IPI00000874,IPI00640741,	PRDX1 Peroxiredoxin-1; PRDX2 Peroxiredoxin-2	185	0.228335	7.62236	4	0.000328828	0.000230943	0	0	0	0	0	0	0	0	0	0	0	0	0	0	0	0	0	0	0.000370488	0	0	3	2	0	0	0	0	0	0	0	0	0	0	0	0	0	0	0	0	0	0	4
IPI00000935,	PLN Cardiac phospholamban	52	0.230769	9.56134	2	0	0.00451893	0.00275345	0	0.00218705	0	0	0	0	0	0	0	0	0	0.00318939	0.00267519	0.00238569	0.00216638	0	0.000939497	0.000659041	0	0.00348895	0	11	6	0	5	0	0	0	0	0	0	0	0	0	11	10	8	7	0	3	2
IPI00001022,	PNKD Isoform 2 of Probable hydrolase PNKD	142	0.183099	11.2515	2	0	0	0	0	0	0	0	0	0	0	0	0	0	0	0	0	0	0.000226663	0.000247684	0	0	0.000371605	0	0	0	0	0	0	0	0	0	0	0	0	0	0	0	0	0	0	2	2	0	0
IPI00001543,	TIMM10 Mitochondrial import inner membrane translocase subunit Tim10	90	0.166667	6.24335	2	0	0	0	0	0	0	0	0	0	0	0	0	0	0	0.000335047	0	0	0	0	0	0	0	0	0	0	0	0	0	0	0	0	0	0	0	0	0	0	2	0	0	0	0	0	0
IPI00001952,	ENDOD1 Endonuclease domain-containing 1 protein	500	0.128	5.37572	5	0.000283889	0	0.000477264	0	0	0	0	0	0	0	0	0	0	0	0	0	0	0	0	0	0	0	0	7	0	10	0	0	0	0	0	0	0	0	0	0	0	0	0	0	0	0	0	0
IPI00002535,	FKBP2 FK506-binding protein 2	142	0.302817	9.6352	2	0	0	0	0	0	0	0	0	0	0	0	0	0.000312338	0	0	0	0	0	0	0	0	0	0	0	0	0	0	0	0	0	0	0	0	0	0	3	0	0	0	0	0	0	0	0
IPI00002970,	SGCB Beta-sarcoglycan	318	0.216981	8.81281	4	0	0	0.000450249	0	0	0	0	0	0	0	0	0	0	0	0	0	0	0	0	0	0	0	0	0	0	6	0	0	0	0	0	0	0	0	0	0	0	0	0	0	0	0	0	0
IPI00003091,	PPP1R3A Isoform 1 of Protein phosphatase 1 regulatory subunit 3A	1122	0.040107	4.66697	2	0	0	0	0	0	0	0	0	0	0	0	0	0	0	0	0	0	0	0	0	0	0	3.23396e-05	0	0	0	0	0	0	0	0	0	0	0	0	0	0	0	0	0	0	0	0	0
IPI00003766,	ETHE1 Protein ETHE1, mitochondrial	254	0.216535	6.83364	4	0	0	0	0	0	0	0	0	0	0	0	0.00018496	0	0	0	0	0	0	0	0.000256451	0	0	0	0	0	0	0	0	0	0	0	0	0	0	3	0	0	0	0	0	0	0	4	0
IPI00003918,IPI00908662,	RPL4 60S ribosomal protein L4	333	0.0489452	11.4688	2	0	0	0	0	0	0	0	0	0	0	0	0	0	0	0	0.000125324	9.31352e-05	0	0	0.000146708	0	0	0	0	0	0	0	0	0	0	0	0	0	0	0	0	0	0	3	2	0	0	3	0
IPI00003935,IPI00152785,IPI00220403,	HIST2H2BE Histone H2B type 2-E	126	0.603175	11.0044	8	0	0	0	0	0	0	0	0	0.000129412	0	0	0.000372855	0	0	0	0	0.000123071	0	0	0.000129243	0.000407978	0.000139598	0.000287977	0	0	0	0	0	0	0	0	1	0	0	3	0	0	0	0	1	0	0	1	3
IPI00003944,	DBT Lipoamide acyltransferase component of branched-chain alpha-keto acid dehydrogenase complex, mitochondrial	482	0.0912863	8.75414	3	0	0	0	0	0	0	0	0	0.000135319	0.000161182	0	0	0	0	0.000125121	8.65831e-05	0	0	7.29691e-05	0.000101357	0.0001422	0	0	0	0	0	0	0	0	0	0	4	5	0	0	0	0	4	3	0	0	2	3	4
IPI00003970,	ME2 NAD-dependent malic enzyme, mitochondrial; ME3 NADP-dependent malic enzyme, mitochondrial	604	0.167218	8.0655	5	0	0	0	0	0	0	0	0	0	0	0	0	0	0	0	4.60629e-05	0	0	5.82303e-05	0	0	0	0	0	0	0	0	0	0	0	0	0	0	0	0	0	0	0	2	0	0	2	0	0
IPI00004457,	AOC3 Membrane primary amine oxidase	763	0.0642202	6.50652	4	0	0	0	0	0	0	0	0	0	0	0	8.20966e-05	0	0	0	0	0	0	0	0	0	0	0	0	0	0	0	0	0	0	0	0	0	0	4	0	0	0	0	0	0	0	0	0
IPI00004656,IPI00796379,	B2M Beta-2-microglobulin	120.5	0.166001	7.03867	2	0	0	0	0	0	0	0	0	0.000405955	0	0	0	0	0	0	0	0	0	0	0	0	0	0	0	0	0	0	0	0	0	0	3	0	0	0	0	0	0	0	0	0	0	0	0
IPI00005038,	HRSP12 Ribonuclease UK114	137	0.649635	9.01564	5	0	0	0	0	0	0	0	0	0	0	0	0	0.000107913	0.000208246	0	0.00020308	0	0	0	0	0	0	0	0	0	0	0	0	0	0	0	0	0	0	0	1	2	0	2	0	0	0	0	0
IPI00005154,	SSRP1 FACT complex subunit SSRP1	709	0.0267983	6.85431	2	0	0	0	0	0	0	0	0	0	0	0	0	0	0	0	0	0	4.53966e-05	0	0	0	0	0	0	0	0	0	0	0	0	0	0	0	0	0	0	0	0	0	0	2	0	0	0
IPI00005202,	PGRMC2 Membrane-associated progesterone receptor component 2	247	0.170041	4.92505	4	0.000164192	0	0.000386449	0	0	0	0	0	0.000330078	0	0.00049654	0.000317002	0.000119709	0.000173257	0	0.00016896	0.000125563	0	0	0	0	0	0.000367258	2	0	4	0	0	0	0	0	5	0	8	5	2	3	0	3	2	0	0	0	0
IPI00005737,IPI00399142,IPI00641719,	SURF4 Isoform 1 of Surfeit locus protein 4	214.333	0.163347	7.71982	2	0	0	0	0	0	0	0	0	0	0	0	0	0.000344883	0.000865207	0	0	0	0	0	0	0	0	0	0	0	0	0	0	0	0	0	0	0	0	0	5	13	0	0	0	0	0	0	0
IPI00005740,	COX4NB Neighbor of COX4	210	0.12381	6.38119	2	0	0	0.000340903	0	0	0	0	0	0	0	0	0	0	0	0	0	0	0	0	0	0	0	0	0	0	3	0	0	0	0	0	0	0	0	0	0	0	0	0	0	0	0	0	0
IPI00005969,IPI00873484,	CAPZA1 F-actin-capping protein subunit alpha-1; CAPZA2 F-actin-capping protein subunit alpha-2	281	0.213591	5.76542	4	0	0	0	0	0	0	0	0	0	0	0	0	0	0	0.00010731	0	0	0	0	0	0	0	0	0	0	0	0	0	0	0	0	0	0	0	0	0	0	2	0	0	0	0	0	0
IPI00006091,IPI00220577,IPI00304638,IPI00304639,IPI00375141,IPI00472316,	DMD Isoform 4 of Dystrophin	3215	0.0149464	5.87524	3	0	0	0	0	0	0	0	0	0	0	0	0	0	0	0	0	0	0	0	0	0	0	5.64309e-06	0	0	0	0	0	0	0	0	0	0	0	0	0	0	0	0	0	0	0	0	0
IPI00006662,IPI00924574,	APOD Apolipoprotein D	202	0.134219	5.04209	3	0	0	0	0	0	0	0	0	0	0	0	0	0	0	0	0	0	0.000239006	0	0	0	0	0	0	0	0	0	0	0	0	0	0	0	0	0	0	0	0	0	0	3	0	0	0
IPI00006957,IPI00339238,	DHRS7 Isoform 1 of Dehydrogenase/reductase SDR family member 7	314	0.237172	8.81601	6	0	0	0.000151995	0	0	0	0	0	0	0	0	4.98724e-05	0	0	0	0	0	0	0	0	0	0	0	0	0	2	0	0	0	0	0	0	0	0	1	0	0	0	0	0	0	0	0	0
IPI00007047,	S100A8 Protein S100-A8	93	0.677419	7.07188	10	0	0	0	0	0	0	0	0	0	0	0	0	0	0	0	0	0	0.00484523	0	0	0	0	0	0	0	0	0	0	0	0	0	0	0	0	0	0	0	0	0	0	28	0	0	0
IPI00007188,	SLC25A4 ADP/ATP translocase 1; SLC25A5 ADP/ATP translocase 2	298	0.275168	10.2348	9	0	0	0	0	0	0	0	0	0	0	0	0	0	0	0	0	0	0	0	0	0.000115	0	0	0	0	0	0	0	0	0	0	0	0	0	0	0	0	0	0	0	0	0	0	2
IPI00007247,IPI00921904,	PCCB Propionyl-CoA carboxylase beta chain, mitochondrial	549	0.215008	7.47686	8	0	0	0	0	0	0	0	0	0	0	0	0	0	0	0.000137314	0	2.82459e-05	0	3.2032e-05	0	0	0	0	0	0	0	0	0	0	0	0	0	0	0	0	0	0	5	0	1	0	1	0	0
IPI00008214,IPI00916085,	NDUFV3 NADH dehydrogenase [ubiquinone] flavoprotein 3, mitochondrial	90.5	0.53951	10.0978	3	0	0	0	0	0	0.000796769	0	0	0	0	0	0	0	0	0	0	0	0	0	0	0	0.000388714	0	0	0	0	0	0	3	0	0	0	0	0	0	0	0	0	0	0	0	0	0	0
IPI00008504,	CA14 Carbonic anhydrase 14	337	0.0712166	6.34014	2	0	0	0	0	0	0	0	0	0	0	0	9.29372e-05	0	0	0	0	0	0	0	0	0	0	0	0	0	0	0	0	0	0	0	0	0	0	2	0	0	0	0	0	0	0	0	0
IPI00008511,	MT-ND5 NADH-ubiquinone oxidoreductase chain 5	606	0.150165	9.4357	6	0	0	0	0	0	0	0	0	0	0	0	0	0	0	0	4.59109e-05	0	0	0	0	0	0	0	0	0	0	0	0	0	0	0	0	0	0	0	0	0	0	2	0	0	0	0	0
IPI00008528,IPI00923534,IPI00929154,IPI00929501,	MT-ATP8 ATP synthase protein 8	68	0.235294	10.6072	2	0	0	0	0	0	0	0	0	0	0	0	0	0	0	0	0	0	0	0	0	0	0	0	0	0	0	0	0	0	0	0	0	0	0	0	0	0	0	0	0	0	0	0	0
IPI00009236,IPI00853146,IPI00876941,	CAV1 Isoform Alpha of Caveolin-1	187.333	0.0972858	6.53019	2	0	0	0	0	0	0	0	0	0	0	0	0	0	0	0	0	0	0	0	0	0	0	0	0	0	0	0	0	0	0	0	0	0	0	0	0	0	0	0	0	0	0	0	0
IPI00009407,	DAD1 Dolichyl-diphosphooligosaccharide--protein glycosyltransferase subunit DAD1	113	0.19469	7.17752	2	0	0	0	0	0	0	0	0	0	0	0	0.000277167	0	0.000252475	0	0	0	0	0	0	0	0	0	0	0	0	0	0	0	0	0	0	0	0	2	0	2	0	0	0	0	0	0	0
IPI00009634,IPI00790715,	SQRDL Sulfide:quinone oxidoreductase, mitochondrial	341.5	0.0781688	9.32843	2	0	0	0	0	0	0	0	0	0	0	0	9.17126e-05	0	0	0	0	0	0	0	0	0	0	0	0	0	0	0	0	0	0	0	0	0	0	2	0	0	0	0	0	0	0	0	0
IPI00009747,IPI00923487,IPI00923506,	LSS Lanosterol synthase	701.667	0.0471551	6.56722	3	0	0	0	0	0	0	0	0	0	0	0	0	0	0	0	0	0	6.88065e-05	0	0	0	0	0	0	0	0	0	0	0	0	0	0	0	0	0	0	0	0	0	0	3	0	0	0
IPI00009817,IPI00878815,	CHCHD8 Isoform 2 of Coiled-coil-helix-coiled-coil-helix domain-containing protein 8	91.5	0.262931	6.31809	2	0	0	0	0	0	0	0	0	0	0	0	0	0	0	0.000329555	0	0	0	0	0	0	0	0	0	0	0	0	0	0	0	0	0	0	0	0	0	0	2	0	0	0	0	0	0
IPI00010107,IPI00789601,IPI00790433,	CAV3 22 kDa protein	165.667	0.110347	5.5973	2	0	0.000257894	0	0	0	0	0	0	0	0	0	0	0	0	0	0	0	0	0	0	0	0	0	0	2	0	0	0	0	0	0	0	0	0	0	0	0	0	0	0	0	0	0	0
IPI00010244,IPI00219350,	MRPS11 Isoform 1 of 28S ribosomal protein S11, mitochondrial	193.5	0.217056	11.4242	3	0	0	0	0	0	0	0	0	0	0	0	0	0	0	0	0.000143783	0	0	0	0.000168316	0	0.000272703	0	0	0	0	0	0	0	0	0	0	0	0	0	0	0	0	2	0	0	0	2	0
IPI00010271,IPI00219675,IPI00394837,	RAC1 Isoform A of Ras-related C3 botulinum toxin substrate 1	183.667	0.0835221	8.898	2	0	0	0	0	0	0	0	0	0	0	0	0	0	0	0	0	0	0	0	0	0	0	0.000296339	0	0	0	0	0	0	0	0	0	0	0	0	0	0	0	0	0	0	0	0	0
IPI00010303,IPI00022204,IPI00412407,	SERPINB4 Serpin B4	383	0.135863	6.28559	5	0	0	0	0	0	0	0	0	0	0	0	0	0	0	0	0	0	0.000252111	0	0	0	0	0	0	0	0	0	0	0	0	0	0	0	0	0	0	0	0	0	0	6	0	0	0
IPI00010331,IPI00016807,	SIRT5 Isoform 2 of NAD-dependent deacetylase sirtuin-5	304.5	0.10841	8.86243	2	0	0	0	0.000225758	0	0	0	0.000223124	0	0	0	0	9.71035e-05	0	0	0	0	0	0	0	0.000168818	0.000173294	0	0	0	0	3	0	0	0	3	0	0	0	0	2	0	0	0	0	0	0	0	3
IPI00011276,IPI00642832,	BCKDHB 2-oxoisovalerate dehydrogenase subunit beta, mitochondrial	305	0.124918	7.23018	2	0	0	0	0	0	0	0	0	0	0	0	0	0	0	0.000395466	0.000273659	0	0	0.000288288	0.000266961	0.000280903	0.000288349	0	0	0	0	0	0	0	0	0	0	0	0	0	0	0	8	6	0	0	5	5	5
IPI00011511,IPI00299177,	CECR5 Isoform 2 of Cat eye syndrome critical region protein 5	408	0.112898	7.56167	3	0	0	0	0	0	0	0	0	0	0	0	0	0	0	0	0	0	7.88877e-05	0	0	0	0.000129333	0	0	0	0	0	0	0	0	0	0	0	0	0	0	0	0	0	0	2	0	0	0
IPI00011937,	PRDX4 Peroxiredoxin-4	271	0.0811808	6.23934	2	0	0	0.000264168	0	0	0	0	0	0	0	0	0	0	0	0	0	0	0	0	0	0	0	0	0	0	3	0	0	0	0	0	0	0	0	0	0	0	0	0	0	0	0	0	0
IPI00012011,	CFL1 Cofilin-1	166	0.150602	8.28815	2	0	0	0	0.000276077	0	0	0	0	0	0	0	0	0	0	0	0	0	0	0	0	0	0	0	0	0	0	2	0	0	0	0	0	0	0	0	0	0	0	0	0	0	0	0	0
IPI00012119,	DCN Isoform A of Decorin	359	0.0668524	8.75817	2	0	0	0	0	0	0	0	0	0	0	0	0	0	0	0	0	0	0	0	0	0	0	0.000101073	0	0	0	0	0	0	0	0	0	0	0	0	0	0	0	0	0	0	0	0	0
IPI00012503,IPI00219825,IPI00744835,IPI00873020,IPI00873201,	PSAP Isoform Sap-mu-0 of Proactivator polypeptide	532.6	0.0601185	4.8036	4	0	0	0	0	0	0	0	0	0	0	0	0	0	0	0	0	0	3.02161e-05	0.000132073	0	0	0	0	0	0	0	0	0	0	0	0	0	0	0	0	0	0	0	0	0	1	4	0	0
IPI00013146,	MRPS22 28S ribosomal protein S22, mitochondrial	360	0.169444	8.07228	4	0	0	0	0	0	0	0	0	0	0	0	0	0	0	0	0	0	0.000134109	0	0	0	0	0	0	0	0	0	0	0	0	0	0	0	0	0	0	0	0	0	0	3	0	0	0
IPI00013167,	MRPS25 28S ribosomal protein S25, mitochondrial	173	0.421965	9.14392	6	0	0	0	0	0	0	0	0	0	0	0	0	0	0	0	0	0	0	0.000304952	0	0	0	0	0	0	0	0	0	0	0	0	0	0	0	0	0	0	0	0	0	0	3	0	0
IPI00013698,IPI00418446,IPI00926290,	ASAH1 Acid ceramidase	370.333	0.203338	7.86685	5	0	0	0.000322185	0	0	0	0	0	0	8.39131e-05	0	0	0	0.000115557	0.000325698	0	0	0.00030419	0.000284914	0	0	0	0	0	0	5	0	0	0	0	0	0	2	0	0	0	3	8	0	0	7	6	0	0
IPI00013809,	GSTZ1 Maleylacetoacetate isomerase; GSTZ1 glutathione transferase zeta 1 isoform 1	216	0.324074	8.71571	4	9.38785e-05	0	0.000110478	0.00021217	0	0	0.000113984	0	0	0	0.000141951	0	0	0	0	0	0	7.4505e-05	0	0	0	0	0	1	0	1	2	0	0	1	0	0	0	2	0	0	0	0	0	0	1	0	0	0
IPI00013885,	CASP14 Caspase-14	242	0.367769	5.27788	11	0	0	0	0	0	0	0	0	0	0	0	0	0	0	0	0	0	0.00152951	0	0	0	0	0	0	0	0	0	0	0	0	0	0	0	0	0	0	0	0	0	0	23	0	0	0
IPI00013933,IPI00217182,	DSP Isoform DPI of Desmoplakin	2571	0.0169559	6.86277	4	0	0	0	0	0	0	0	0	0	0	0	0	0	0	0	0	0	2.50379e-05	0	0	0	0	0	0	0	0	0	0	0	0	0	0	0	0	0	0	0	0	0	0	4	0	0	0
IPI00013976,	LAMB1 Laminin subunit beta-1	1786	0.115902	4.58065	16	0	0	0	0	0	0	0	0	0	0	0	0	0	0	0	0	0	0	0	0	0	0	0.000264113	0	0	0	0	0	0	0	0	0	0	0	0	0	0	0	0	0	0	0	0	0
IPI00014053,	TOMM40 Isoform 1 of Mitochondrial import receptor subunit TOM40 homolog	361	0.132964	7.28882	4	0	0	0	6.34748e-05	0	0	0	0	9.03373e-05	0	0.000169869	8.67586e-05	0	0.000118544	0	3.85347e-05	0	0	4.87134e-05	4.51098e-05	9.49311e-05	4.87239e-05	5.02563e-05	0	0	0	1	0	0	0	0	2	0	4	2	0	3	0	1	0	0	1	1	2
IPI00014301,IPI00395015,IPI00395016,IPI00924786,IPI00927841,	OXA1L Oxidase (Cytochrome c) assembly 1-like	360.2	0.0612287	9.22381	2	0	0	0	0	0	0	0	0	0	0	0	0	0	0	0	0	0	8.93564e-05	0	0	0	0	0	0	0	0	0	0	0	0	0	0	0	0	0	0	0	0	0	0	2	0	0	0
IPI00014398,IPI00029028,IPI00055606,IPI00641404,IPI00643324,IPI00644118,IPI00644668,IPI00645286,IPI00647207,IPI00922730,IPI00922769,	FHL1 cDNA FLJ55259, highly similar to Four and a half LIM domains protein 1	246.546	0.0961626	8.45173	2	0	0	0	0	0	0	0	0	0	0	0	0	0	0	0	0	0	0	0	0.000792614	0	0	0	0	0	0	0	0	0	0	0	0	0	0	0	0	0	0	0	0	0	0	12	0
IPI00014424,	EEF1A2 Elongation factor 1-alpha 2	463	0.166307	9.50428	6	0	0	0	0	0	0	0	0	0	0	0	0	3.19309e-05	0	9.76919e-05	3.00454e-05	0	0	0	0	0	0	3.91848e-05	0	0	0	0	0	0	0	0	0	0	0	0	1	0	3	1	0	0	0	0	0
IPI00015140,IPI00741999,IPI00925848,	MT-CYB Cytochrome b	379.667	0.0421427	8.18098	2	0	0	0	0	0	0	0	0	0	0	0	0	0	0	0.000119134	0	0	0	0	0	0.000180527	0	0	0	0	0	0	0	0	0	0	0	0	0	0	0	0	3	0	0	0	0	0	4
IPI00016405,IPI00816371,IPI00816523,	OCIAD1 Isoform 1 of OCIA domain-containing protein 1	208.667	0.126393	7.56674	2	0	0	0	0	0	0	0	0	0	0	0	0	0	0	0	0	0	0	0	0.000546289	0	0	0	0	0	0	0	0	0	0	0	0	0	0	0	0	0	0	0	0	0	0	7	0
IPI00016608,IPI00797864,	TMED2 Transmembrane emp24 domain-containing protein 2	185	0.119815	5.25218	2	0	0	0.000773942	0	0	0	0.000399252	0	0	0	0	0	0	0	0	0	0	0	0	0	0	0	0.000196136	0	0	6	0	0	0	3	0	0	0	0	0	0	0	0	0	0	0	0	0	0
IPI00016637,	OXSM 3-oxoacyl-[acyl-carrier-protein] synthase, mitochondrial	459	0.163399	7.71922	5	0	0	0	0	0	0	0	0	0	0	3.34002e-05	0	0	0	0	0	0	0	0	0	0	0	0	0	0	0	0	0	0	0	0	0	0	1	0	0	0	0	0	0	0	0	0	0
IPI00017367,IPI00903145,	MSN Moesin; RDX Radixin, isoform CRA_a	593.5	0.097756	6.48658	4	0	0	0	0	0	0	0	0	0	0	0	0	2.49099e-05	2.40351e-05	0	0	2.61281e-05	0	0	2.74383e-05	5.77424e-05	0	3.05687e-05	0	0	0	0	0	0	0	0	0	0	0	0	1	1	0	0	1	0	0	1	2
IPI00017592,	LETM1 LETM1 and EF-hand domain-containing protein 1, mitochondrial	739	0.0690122	6.66035	4	0	0	0	0	0	0	0	0	0	0	0	0	0	0	0	0	0	8.71074e-05	0	0	4.63737e-05	9.5206e-05	0	0	0	0	0	0	0	0	0	0	0	0	0	0	0	0	0	0	4	0	0	2
IPI00017672,IPI00871140,	NP cDNA FLJ25678 fis, clone TST04067, highly similar to PURINE NUCLEOSIDE PHOSPHORYLASE	291	0.0927879	7.09156	2	0	0	0	0	0	0	0	0	0	0	0	0	0	0	0	0	0	0	0	0	0.00017665	0	0	0	0	0	0	0	0	0	0	0	0	0	0	0	0	0	0	0	0	0	0	3
IPI00017799,IPI00878215,	- cDNA FLJ55158, highly similar to Thioredoxin, mitochondrial	181.5	0.227555	8.62287	3	0	0	0	0	0	0	0	0	0	0	0	0	0	0.000235782	0.000166139	0.000919736	0	0	0	0	0	0	0	0	0	0	0	0	0	0	0	0	0	0	0	0	3	2	12	0	0	0	0	0
IPI00018236,	GM2A Ganglioside GM2 activator	193	0.0880829	4.9623	2	0	0	0	0	0	0	0	0	0	0	0	0	0	0	0	0	0	0.000166768	0	0	0	0	0	0	0	0	0	0	0	0	0	0	0	0	0	0	0	0	0	0	2	0	0	0
IPI00018237,	TMEM38B Trimeric intracellular cation channel type B	291	0.113402	9.47888	2	0	0	0	0	0	0	0.000169213	0	0	0	0	0	0	0	0	0	0	0	0	0	0	0	0	0	0	0	0	0	0	2	0	0	0	0	0	0	0	0	0	0	0	0	0	0
IPI00018342,IPI00640817,	AK1 Adenylate kinase isoenzyme 1	202	0.242955	8.92023	4	0.000301155	0	0	0	0	0	0	0	0	0	0	0.000310098	0	0	0	0	0	0.000159337	0	0	0.000339308	0	0	3	0	0	0	0	0	0	0	0	0	0	4	0	0	0	0	0	2	0	0	4
IPI00018600,	OPA3 Isoform 1 of Optic atrophy 3 protein	179	0.206704	9.2126	2	0	0	0	0	0	0	0	0	0	0.000173608	0	0	0	0	0	0	0	0	0	0	0	0	0	0	0	0	0	0	0	0	0	0	2	0	0	0	0	0	0	0	0	0	0	0
IPI00018628,IPI00915875,IPI00916273,	COQ10B Protein COQ10 B, mitochondrial	212	0.228524	9.63801	4	0	0	0	0	0	0	0	0	0.000384573	0.000293168	0.000216943	0	0	0	0	0	0	0	0.000248852	0	0.000242477	0	0.000256734	0	0	0	0	0	0	0	0	5	4	3	0	0	0	0	0	0	0	3	0	3
IPI00019353,	AGK Isoform 1 of Acylglycerol kinase, mitochondrial	422	0.0876777	8.20892	2	0	0	0	0	0	0	0	0	0	0	0	0	0	0	0	0	0	7.62705e-05	0	0	0	0	0	0	0	0	0	0	0	0	0	0	0	0	0	0	0	0	0	0	2	0	0	0
IPI00019485,IPI00384676,	ECHDC2 Isoform 2 of Enoyl-CoA hydratase domain-containing protein 2, mitochondrial	276.5	0.156006	9.31925	2	0	0	0	0	0	0	0	0	0	0	0	0	0	0	0	0	0	0	0	0	0	0	0	0	0	0	0	0	0	0	0	0	0	0	0	0	0	0	0	0	0	0	0	0
IPI00019502,	MYH9 Isoform 1 of Myosin-9	1960	0.0316326	5.28925	4	0	0	0	0	0	0	0	0	0	0	0	0	0	0	0	0	0	0	0	0	0	0	3.70256e-05	0	0	0	0	0	0	0	0	0	0	0	0	0	0	0	0	0	0	0	0	0
IPI00019906,IPI00218019,	BSG Isoform 2 of Basigin	327	0.116825	5.38777	3	0	0	7.29761e-05	0	0	0	0	0	0	0	0	0	0	0	0	0	0	0	0	0	0	0	5.54818e-05	0	0	1	0	0	0	0	0	0	0	0	0	0	0	0	0	0	0	0	0	0
IPI00019912,	HSD17B4 Peroxisomal multifunctional enzyme type 2	736	0.108696	9.20658	5	0	0	0	0	0	0	0	0	0	0	0	0	0	0	0	0	0	0	0	2.21258e-05	6.9844e-05	0	0	0	0	0	0	0	0	0	0	0	0	0	0	0	0	0	0	0	0	0	1	3
IPI00020210,IPI00793867,IPI00871702,IPI00890768,IPI00908443,IPI00908936,	DYSF Isoform 14 of Dysferlin	2097.83	0.181146	5.44513	27	9.66605e-06	1.0183e-05	0	0	0	0	0	0	0	7.40664e-06	0	7.46481e-06	0	6.79979e-06	0	6.63113e-06	0	0	0	0	0	0	1.72964e-05	1	1	0	0	0	0	0	0	0	1	0	1	0	1	0	1	0	0	0	0	0
IPI00020883,	HIGD2A HIG1 domain family member 2A	106	0.273585	10.7654	2	0	0	0	0	0	0.000453507	0	0	0	0	0	0	0.000418415	0.000269148	0	0	0	0	0	0	0	0	0	0	0	0	0	0	2	0	0	0	0	0	0	3	2	0	0	0	0	0	0	0
IPI00020986,	LUM Lumican	338	0.281065	6.59887	7	0	0	0	0	0	0	0	0	0	0	0	0	0	0	0	0	0	0	0	0	0	0	0.000536762	0	0	0	0	0	0	0	0	0	0	0	0	0	0	0	0	0	0	0	0	0
IPI00021369,	CRYAB Alpha-crystallin B chain	175	0.44	7.37779	7	0.000115873	0	0	0	0	0	0	0	0	0.000177576	8.76038e-05	0	0	0	0	0	0	0	0.000200978	0	0	0	0	1	0	0	0	0	0	0	0	0	2	1	0	0	0	0	0	0	0	2	0	0
IPI00021536,	CALML5 Calmodulin-like protein 5	146	0.219178	4.05278	3	0	0	0	0	0	0	0	0	0	0	0	0	0	0	0	0	0	0.000771586	0	0	0	0	0	0	0	0	0	0	0	0	0	0	0	0	0	0	0	0	0	0	7	0	0	0
IPI00021812,	AHNAK Neuroblast differentiation-associated protein AHNAK	5890	0.00271647	5.98867	2	0	0	0	0	0	0	0	0	0	0	0	0	0	0	5.11957e-06	0	0	0	0	0	0	0	0	0	0	0	0	0	0	0	0	0	0	0	0	0	0	2	0	0	0	0	0	0
IPI00021885,IPI00029717,IPI00902755,	FGA Isoform 1 of Fibrinogen alpha chain	586.667	0.143094	8.03455	6	0	0	0	0	0	0	0	0	2.77941e-05	0	0	0	0	0	0.000205597	0	0	0	0	0	0	0	0	0	0	0	0	0	0	0	0	1	0	0	0	0	0	8	0	0	0	0	0	0
IPI00021891,IPI00219713,IPI00877703,IPI00877792,	FGG Isoform Gamma-B of Fibrinogen gamma chain	449	0.138139	5.64791	5	0	0	0	0	0	0	0	0	0	0	0	0	0	0	0.000268635	0	0	0	0	0	0	0	0	0	0	0	0	0	0	0	0	0	0	0	0	0	0	8	0	0	0	0	0	0
IPI00022200,IPI00072917,IPI00072918,IPI00220701,IPI00871621,	COL6A3 Isoform 1 of Collagen alpha-3(VI) chain	3014.8	0.221396	7.00603	49	2.01782e-05	0	0	1.52013e-05	0	0	0	0	2.16344e-05	0	0	0.000249329	0	0	0	0	0	0	0	0	9.66221e-05	0	0.000734175	3	0	0	2	0	0	0	0	4	0	0	48	0	0	0	0	0	0	0	0	17
IPI00022202,IPI00215777,IPI00790115,	SLC25A3 Isoform A of Phosphate carrier protein, mitochondrial; SLC25A3 cDNA FLJ90278 fis, clone NT2RP1000325, highly similar to Phosphate carrier protein, mitochondrialprecursor	361.333	0.348709	9.76589	18	0	0	0	0	0	0.00019956	0	0.000125353	9.02539e-05	0	8.48561e-05	0	0	0	0	0	4.29161e-05	0.000178152	9.7337e-05	0.000225341	0	0	0	0	0	0	0	0	3	0	2	2	0	2	0	0	0	0	0	1	4	2	5	0
IPI00022276,IPI00791486,IPI00795922,	MRPS28 28S ribosomal protein S28, mitochondrial	186.667	0.101845	9.62014	2	0	0	0	0	0	0	0	0	0	0	0	0	0	0	0	0	0	0	0.000188417	0	0	0	0	0	0	0	0	0	0	0	0	0	0	0	0	0	0	0	0	0	0	2	0	0
IPI00022277,	CCDC56 Coiled-coil domain-containing protein 56	106	0.273585	10.0417	3	0	0	0	0.000432347	0.000643735	0.00068026	0	0	0	0	0	0.00029547	0	0.000807443	0.000711185	0.000918652	0.000731462	0	0	0	0	0	0	0	0	0	2	3	3	0	0	0	0	0	2	0	6	5	7	5	0	0	0	0
IPI00022300,	METTL7A Methyltransferase-like protein 7A	244	0.204918	8.47403	3	8.31056e-05	0	9.78e-05	0	0	0	0	0	0	0	0	0	0	0	0	0	0	0	0	0	0	0	0	1	0	1	0	0	0	0	0	0	0	0	0	0	0	0	0	0	0	0	0	0
IPI00022316,IPI00445391,	MRPS18B 28S ribosomal protein S18b, mitochondrial	236.5	0.196124	9.24141	3	0	0	0	0	0	0	0	0	0	0	0	0	0	0	0.000127502	0.000117641	0	0	0	0	0	0	0	0	0	0	0	0	0	0	0	0	0	0	0	0	0	2	2	0	0	0	0	0
IPI00022391,	APCS Serum amyloid P-component	223	0.143498	6.51881	3	0	0	0	0	0	0	0	0	0	0	0	0.000351119	0	0	0	0	0	0	0	0	0	0	0	0	0	0	0	0	0	0	0	0	0	0	5	0	0	0	0	0	0	0	0	0
IPI00022403,IPI00792439,	MRPL13 39S ribosomal protein L13, mitochondrial	166	0.375456	9.23934	5	0	0	0	0.000552154	0	0	0	0	0	0.000374407	0.00027706	0	0	0	0	0	0	0	0.000423748	0	0.000516117	0	0	0	0	0	4	0	0	0	0	0	4	3	0	0	0	0	0	0	0	4	0	5
IPI00022433,IPI00908768,	HSPB6 Heat shock protein beta-6	185.5	0.189286	7.39178	2	0	0	0	0	0	0	0	0	0	0	0	0	0	0	0	0	0	0	0.000189602	0	0	0	0	0	0	0	0	0	0	0	0	0	0	0	0	0	0	0	0	0	0	2	0	0
IPI00023006,	ACTC1 Actin, alpha cardiac muscle 1	377	0.0583554	5.05026	2	0.000215149	0	0	0	0	0	0	0	0	0	0	0	0	0	0	0	0	0	0	0	9.09022e-05	0	0	4	0	0	0	0	0	0	0	0	0	0	0	0	0	0	0	0	0	0	0	2
IPI00023086,	MRPL15 39S ribosomal protein L15, mitochondrial	296	0.101351	10.5604	2	0	0	0	0	0	0	0	0	0	0	0	0	0	0	0	9.39933e-05	0	0	0	0	0	0	0	0	0	0	0	0	0	0	0	0	0	0	0	0	0	0	2	0	0	0	0	0
IPI00023161,IPI00798240,	MRPL46 39S ribosomal protein L46, mitochondrial	278.5	0.150808	7.3457	3	0	0	0	0	0	0	0	0	0	0	0	0	0	0	0	0	0	0	0	0	0	6.31573e-05	0	0	0	0	0	0	0	0	0	0	0	0	0	0	0	0	0	0	0	0	0	0
IPI00023283,IPI00759542,IPI00759754,	TTN Isoform 2 of Titin; TTN titin isoform novex-1	34360.7	0.260154	6.25092	715	0	0	4.86144e-06	0	0	0	0	0	0	0	0	0	3.01182e-06	2.90605e-06	0	1.21456e-06	1.3539e-06	0	5.11793e-07	1.09004e-05	4.98683e-07	0	5.28003e-07	0	0	7	0	0	0	0	0	0	0	0	0	7	7	0	3	3	0	1	23	1
IPI00023748,IPI00797126,IPI00797259,IPI00909970,	NACA Nascent polypeptide-associated complex subunit alpha	382	0.117563	4.20383	2	0	0	0	0	0	0	0	0	0	0	0	0	0	0	0	0.000182081	0	0	0	0	0	0	0	0	0	0	0	0	0	0	0	0	0	0	0	0	0	0	5	0	0	0	0	0
IPI00024046,	CDH13 cDNA FLJ52398, highly similar to Cadherin-13	760	0.0644737	4.72088	3	0	0	0	0	0	0	0	0	0	0	0	4.12103e-05	0	5.63085e-05	0	0	0	0	0	0	0	0	7.16153e-05	0	0	0	0	0	0	0	0	0	0	0	2	0	3	0	0	0	0	0	0	0
IPI00024107,IPI00218467,	SNCA Isoform 1 of Alpha-synuclein	126	0.409821	6.62273	4	0	0	0	0	0	0	0	0	0	0	0	0	0	0	0	0	0	0	0	0	0.000271985	0	0	0	0	0	0	0	0	0	0	0	0	0	0	0	0	0	0	0	0	0	0	2
IPI00024266,	MGST3 Microsomal glutathione S-transferase 3	152	0.401316	9.68014	5	0	0	0	0	0	0	0	0	0	0	0	0	0	0	0	0	0	0	0	0	0	0	0	0	0	0	0	0	0	0	0	0	0	0	0	0	0	0	0	0	0	0	0	0
IPI00024284,	HSPG2 Basement membrane-specific heparan sulfate proteoglycan core protein	4391	0.0961057	6.49496	27	0	0	0	0	0	0	0	0	1.11404e-05	0	0	3.56637e-05	0	0	0	0	0	0	0	0	0	0	0.000218983	0	0	0	0	0	0	0	0	3	0	0	10	0	0	0	0	0	0	0	0	0
IPI00024462,	DHODH Dihydroorotate dehydrogenase, mitochondrial	395	0.0936709	10.231	3	0	0	0	0	0	0	0	0	0	0	0	0	0	0	0	0	0	4.0742e-05	0	0	0	4.45299e-05	0	0	0	0	0	0	0	0	0	0	0	0	0	0	0	0	0	0	1	0	0	0
IPI00024551,IPI00795993,	C15orf24 UPF0480 protein C15orf24	205.5	0.175864	10.1802	2	0.000197351	0	0	0	0	0	0	0	0	0	0	0	0	0	0	0	0	0	0	0	0	0	0	2	0	0	0	0	0	0	0	0	0	0	0	0	0	0	0	0	0	0	0	0
IPI00024580,	MCCC1 Methylcrotonoyl-CoA carboxylase subunit alpha, mitochondrial	725	0.253793	7.85572	12	0	2.94651e-05	0	0	0	0	0	0	0	0.000107158	0	0	2.03917e-05	0	0	0	0	0	0	0	0	0	0	0	1	0	0	0	0	0	0	0	5	0	0	1	0	0	0	0	0	0	0	0
IPI00024911,	ERP29 Endoplasmic reticulum protein ERp29	261	0.103448	7.48578	2	0	0	0.00027429	0	0	0	0	0	0	0	0	0.000239999	0	0	0	0	0	0	0	0	0	0	0	0	0	3	0	0	0	0	0	0	0	0	4	0	0	0	0	0	0	0	0	0
IPI00025100,IPI00444329,	BCKDHA 2-oxoisovalerate dehydrogenase subunit alpha, mitochondrial	462	0.26226	7.46137	8	0	0	0	0	0	0	0	0	0	0	0	0	0	0	0	9.03312e-05	0	0	0	0	0	3.80721e-05	0	0	0	0	0	0	0	0	0	0	0	0	0	0	0	0	3	0	0	0	0	0
IPI00025252,	PDIA3 Protein disulfide-isomerase A3	505	0.205941	6.27838	8	0.000361386	0	0	0	0	0	0	0	0	0	0	0	0	0	0.000149278	0	0	0	0	6.44935e-05	0	0	0.000107778	9	0	0	0	0	0	0	0	0	0	0	0	0	0	5	0	0	0	0	2	0
IPI00025415,	SEMG2 Semenogelin-2	582	0.0601375	9.61389	3	0	0	0	0	0	0	0	0	0	0	0	0	0	0	7.77171e-05	0	0	0	0	0	0	0	0	0	0	0	0	0	0	0	0	0	0	0	0	0	0	3	0	0	0	0	0	0
IPI00025465,	OGN cDNA FLJ59205, highly similar to Mimecan	356	0.151685	8.12403	5	0	0	0	0	0	0	0	0	0	0	0	0	0	0	0	0	0	0	0	0	0	0	0.000356735	0	0	0	0	0	0	0	0	0	0	0	0	0	0	0	0	0	0	0	0	0
IPI00025753,	DSG1 Desmoglein-1	1049	0.0200191	4.6553	2	0	0	0	0	0	0	0	0	0	0	0	0	0	0	0	0	0	3.06827e-05	0	0	0	0	0	0	0	0	0	0	0	0	0	0	0	0	0	0	0	0	0	0	2	0	0	0
IPI00025874,	RPN1 Dolichyl-diphosphooligosaccharide--protein glycosyltransferase subunit 1 precursor	646	0.0851393	6.2193	4	0	0	0.00022164	0	0	0	0	0	0	0	0	4.84827e-05	0	0	0	0	0	0	0	0	0	0	0	0	0	6	0	0	0	0	0	0	0	0	2	0	0	0	0	0	0	0	0	0
IPI00026087,	BANF1 Barrier-to-autointegration factor	89	0.505618	5.88382	4	0	0	0	0	0	0	0	0	0	0	0	0	0	0	0	0	0	0	0	0	0	0	0.000203849	0	0	0	0	0	0	0	0	0	0	0	0	0	0	0	0	0	0	0	0	0
IPI00026105,IPI00479510,IPI00479934,	SCP2 Isoform SCPx of Non-specific lipid-transfer protein	396.667	0.0840196	7.72882	2	0	0	0	0	0	0	0	0	0	0	0	0	0	0	0	0.000175349	0	0	0	0	0	0	0	0	0	0	0	0	0	0	0	0	0	0	0	0	0	0	5	0	0	0	0	0
IPI00026111,IPI00761107,	TMCO1 Isoform 1 of Transmembrane and coiled-coil domain-containing protein 1	178.5	0.162927	10.2976	2	0	0	0	0	0	0	0	0	0	0	0	0	0	0	0	0.000467597	0	0	0	0	0	0	0	0	0	0	0	0	0	0	0	0	0	0	0	0	0	0	6	0	0	0	0	0
IPI00026256,	FLG Filaggrin	4061	0.00541739	9.60433	2	0	0	0	0	0	0	0	0	0	0	0	0	0	0	0	0	0	7.92568e-06	0	0	0	0	0	0	0	0	0	0	0	0	0	0	0	0	0	0	0	0	0	0	2	0	0	0
IPI00026850,IPI00902656,	TSPO Translocator protein	138	0.122104	9.42735	2	0	0	0	0	0	0	0	0	0	0	0	0	0	0.000206737	0	0	0	0.000466466	0.000637158	0.000826031	0.000496669	0	0.000394403	0	0	0	0	0	0	0	0	0	0	0	0	0	2	0	0	0	4	5	7	4
IPI00026942,	ERLIN2 Isoform 1 of Erlin-2	339	0.268437	5.32522	6	0	0	0.000281572	0	0	0	0	0	0	0	0	0	0	0	0	0	9.14867e-05	0	0	0	0	0	0.000267589	0	0	4	0	0	0	0	0	0	0	0	0	0	0	0	0	2	0	0	0	0
IPI00026944,IPI00384542,	NID1 Isoform 1 of Nidogen-1	1180.5	0.04164	5.07174	4	0	0	0	0	0	0	0	0	0	0	0	0	0	0	0	0	0	0	0	0	0	0	0.000122948	0	0	0	0	0	0	0	0	0	0	0	0	0	0	0	0	0	0	0	0	0
IPI00026958,IPI00221118,IPI00790677,IPI00910128,IPI00911050,	FDXR Isoform Short of NADPH:adrenodoxin oxidoreductase, mitochondrial	499	0.0904896	8.66793	3	0	0	0	0	0	0	0	0	0	0	0	0.00012553	0	0	0	0	0	0	0	0	0	0	0	0	0	0	0	0	0	0	0	0	0	0	4	0	0	0	0	0	0	0	0	0
IPI00027438,	FLOT1 Flotillin-1	427	0.180328	7.57587	5	0	0	0	0	0	0	0	0	0	0	0	3.66743e-05	0	0	0	0	0	0	0	0	0	4.11928e-05	8.49768e-05	0	0	0	0	0	0	0	0	0	0	0	1	0	0	0	0	0	0	0	0	0
IPI00027445,	HARS2 Probable histidyl-tRNA synthetase, mitochondrial	506	0.0494071	8.34558	2	0	0	0	0	0	0	0	0	0	0	0	0	0	0	0	5.49842e-05	0	0	0	0	0	0	0	0	0	0	0	0	0	0	0	0	0	0	0	0	0	0	2	0	0	0	0	0
IPI00027462,	S100A9 Protein S100-A9	114	0.640351	6.0744	8	0	0	0	0	0	0	0	0	0	0	0	0	0	0.00050052	0	0	0	0.0069172	0	0	0	0	0	0	0	0	0	0	0	0	0	0	0	0	0	0	4	0	0	0	49	0	0	0
IPI00027466,	CA4 Carbonic anhydrase 4	312	0.0769231	7.9409	2	0	0	0	0	0	0	0	0	0	0	0	0	0	0	0	0	0	0	0	0	0	0	0.000232597	0	0	0	0	0	0	0	0	0	0	0	0	0	0	0	0	0	0	0	0	0
IPI00027547,	DCD Dermcidin	110	0.354546	6.5155	4	0	0.000776807	0	0	0	0	0	0.00082353	0	0	0	0	0	0	0	0	0	0	0	0	0	0	0	0	4	0	0	0	0	0	4	0	0	0	0	0	0	0	0	0	0	0	0	0
IPI00028003,	COX7B Cytochrome c oxidase subunit 7B, mitochondrial	80	0.1	10.8705	2	0	0	0	0.00057286	0	0	0	0	0	0	0	0	0	0	0	0	0	0	0	0	0	0	0	0	0	0	2	0	0	0	0	0	0	0	0	0	0	0	0	0	0	0	0	0
IPI00028055,	TMED10 Transmembrane emp24 domain-containing protein 10	219	0.223744	7.55286	4	9.25925e-05	0	0.000217929	0	0	0	0	0	0	0	7.00031e-05	7.15065e-05	0	0	0	0	0	0	8.02993e-05	0	7.82423e-05	0	0	1	0	2	0	0	0	0	0	0	0	1	1	0	0	0	0	0	0	1	0	1
IPI00028120,IPI00619961,IPI00827872,	EPB42 Isoform Long of Erythrocyte membrane protein band 4.2	677	0.0593287	8.28252	3	0	0	0	0	0	0	0	0	0	0	0	4.62627e-05	0	0	4.4541e-05	0	0	0	0	0	0	0	0	0	0	0	0	0	0	0	0	0	0	0	2	0	0	2	0	0	0	0	0	0
IPI00028376,	TIMM8A Mitochondrial import inner membrane translocase subunit Tim8 A	97	0.226804	4.80505	2	0	0	0	0	0	0	0	0	0	0	0	0	0	0	0	0.000286825	0	0.000331816	0	0	0	0	0	0	0	0	0	0	0	0	0	0	0	0	0	0	0	0	2	0	2	0	0	0
IPI00028904,	NDUFB2 NADH dehydrogenase [ubiquinone] 1 beta subcomplex subunit 2, mitochondrial	105	0.171429	5.54918	2	0	0	0	0	0	0	0	0	0	0	0	0	0	0	0	0	0	0.000306535	0	0.000310183	0	0.000335035	0	0	0	0	0	0	0	0	0	0	0	0	0	0	0	0	0	0	2	0	2	0
IPI00028908,IPI00293033,	NID2 Nidogen-2	1172	0.0580557	5.20008	3	0	0	0	0	0	0	0	0	0	0	0	0	0	0	0	0	0	0	0	0	0	0	6.19199e-05	0	0	0	0	0	0	0	0	0	0	0	0	0	0	0	0	0	0	0	0	0
IPI00028911,	DAG1 Dystroglycan	895	0.0558659	8.84768	3	0	0	0	0	0	0	0	0	0	0	0	0	0	0	0	0	0	0	0	0	0	0	0.000101355	0	0	0	0	0	0	0	0	0	0	0	0	0	0	0	0	0	0	0	0	0
IPI00028946,IPI00398795,IPI00412154,IPI00743293,	RTN3 Isoform 3 of Reticulon-3	634	0.0480463	6.59582	2	0	0	0	0	0	0	0	0	0	0	0	0	0	0	0	0	0	0	0	0.000102742	0	0	0	0	0	0	0	0	0	0	0	0	0	0	0	0	0	0	0	0	0	0	4	0
IPI00029114,IPI00791262,	ICT1 Immature colon carcinoma transcript 1 protein	209.5	0.105041	10.6909	2	0	0	0.000341716	0	0	0	0	0	0	0	0	0	0	0	0	0	0	0.000307267	0	0.000233193	0	0	0	0	0	3	0	0	0	0	0	0	0	0	0	0	0	0	0	0	4	0	3	0
IPI00029665,	MMAB Cob(I)yrinic acid a,c-diamide adenosyltransferase, mitochondrial	250	0.144	8.78295	3	0	0	0	0	0	0	0	0	0	0	0	0	0	0	0	0	0	0.000193117	0	0	0.000342701	0.000140714	0	0	0	0	0	0	0	0	0	0	0	0	0	0	0	0	0	0	3	0	0	5
IPI00030104,	MYBPC1 myosin binding protein C, slow type isoform 1; MYBPC2 Myosin-binding protein C, fast-type	1142	0.176007	7.5983	15	0	0	0	0	0	6.31415e-05	0	0	0	4.08176e-05	0	0	6.47286e-05	3.74733e-05	0.000250845	9.74502e-05	9.50517e-05	0	0	5.70389e-05	0	0	4.76599e-05	0	0	0	0	0	3	0	0	0	3	0	0	5	3	19	8	7	0	0	4	0
IPI00030531,IPI00791574,IPI00794566,	SLMAP Isoform 3 of Sarcolemmal membrane-associated protein; SLMAP Isoform 4 of Sarcolemmal membrane-associated protein	809.667	0.111198	5.09996	9	2.50446e-05	0	0	0	0	0	0	0	0	0	0	0	0	0	0	0	0	0	0	0	0	0	0	1	0	0	0	0	0	0	0	0	0	0	0	0	0	0	0	0	0	0	0	0
IPI00031109,	NDUFAF2 Mimitin, mitochondrial	169	0.224852	9.46542	3	0	0	0	0	0	0	0	0	0.000192969	0.00018388	0.000181428	0	0	0	0	0.000164627	0.000183515	0	0.000208113	0	0	0.000416315	0	0	0	0	0	0	0	0	0	2	2	2	0	0	0	0	2	2	0	2	0	0
IPI00031169,IPI00873632,	RAB2A Ras-related protein Rab-2A	212.5	0.202354	6.57064	3	0	0	0	0	0	0	0	0	0	0	0	0.000221081	0.000347859	0.000335643	0.000212853	0.000196391	0	0	0	0	0	0	0	0	0	0	0	0	0	0	0	0	0	0	3	5	5	3	3	0	0	0	0	0
IPI00031397,	ACSL3 Long-chain-fatty-acid--CoA ligase 3	720	0.154167	8.51397	9	0.000140818	0	9.943e-05	0	0	0	6.83904e-05	0	0	0	0	0.00010875	0	7.92491e-05	0	0	0.000129225	0	0	0	0	0	7.55939e-05	5	0	3	0	0	0	2	0	0	0	0	5	0	4	0	0	6	0	0	0	0
IPI00031564,	GGCT Isoform 1 of Gamma-glutamylcyclotransferase	188	0.31383	4.78828	5	0	0	0	0	0	0	0	0	0	0	0	0	0	0	0	0	0	0.000770414	0	0	0	0	0	0	0	0	0	0	0	0	0	0	0	0	0	0	0	0	0	0	9	0	0	0
IPI00031697,	TMEM109 Transmembrane protein 109	243	0.127572	11.0932	3	0	0	0	0	0	0	0	0	0	0	0	0	0	0.000117406	0	0	0	6.62267e-05	0.000144737	0.000201045	0	0	0	0	0	0	0	0	0	0	0	0	0	0	0	0	2	0	0	0	1	2	3	0
IPI00032103,IPI00216279,IPI00792191,	GATM Isoform Mitochondrial of Glycine amidinotransferase, mitochondrial	430	0.0632021	8.27796	2	0	0	0	0	0	0	0	0	0	0	0	7.28368e-05	0	0	0	0	0	0	0	0	0	0	0	0	0	0	0	0	0	0	0	0	0	0	2	0	0	0	0	0	0	0	0	0
IPI00032137,	- cDNA FLJ58651, highly similar to Alpha-actinin-3; ACTN3 Alpha-actinin-3	901	0.470588	5.20316	33	0	0	0	0	0	0	0	0	0	0	0	0	0	0	0	0	0	0	0	0	5.70535e-05	0	0	0	0	0	0	0	0	0	0	0	0	0	0	0	0	0	0	0	0	0	0	3
IPI00032325,	CSTA Cystatin-A	98	0.397959	5.1669	2	0	0	0	0	0	0	0	0	0	0	0	0	0	0	0	0	0	0.00032843	0	0	0	0	0	0	0	0	0	0	0	0	0	0	0	0	0	0	0	0	0	0	2	0	0	0
IPI00032872,	MRPS16 28S ribosomal protein S16, mitochondrial	137	0.335766	9.95916	3	0	0	0	0	0	0	0	0	0	0	0	0	0	0	0.000220104	0	0	0.000469871	0.000385085	0.000356598	0	0.000641946	0.000397282	0	0	0	0	0	0	0	0	0	0	0	0	0	0	2	0	0	4	3	3	0
IPI00032881,	MRPS23 28S ribosomal protein S23, mitochondrial	190	0.157895	9.32534	3	0	0	0	0	0	0	0	0	0	0	0	0	0	0	0	0	0	0.000169401	0	0	0	0.000185151	0	0	0	0	0	0	0	0	0	0	0	0	0	0	0	0	0	0	2	0	0	0
IPI00032994,IPI00798120,	SSPN Isoform 1 of Sarcospan	191.5	0.101323	7.84193	2	0	0	0	0	0	0	0	0	0	0	0	0	0	0	0	0	0	0	0	0	0	0	0.000378956	0	0	0	0	0	0	0	0	0	0	0	0	0	0	0	0	0	0	0	0	0
IPI00033494,IPI00220573,IPI00604523,IPI00719669,	MYL12B Myosin regulatory light chain MRLC2	173	0.283288	4.39616	4	0	0	0	0	0	0	0	0	0	0	0	0	0	0	0	0	0	0	0	0	0	0	0.000524351	0	0	0	0	0	0	0	0	0	0	0	0	0	0	0	0	0	0	0	0	0
IPI00037448,	GRHPR Glyoxylate reductase/hydroxypyruvate reductase	328	0.356707	7.43675	9	0	0	7.27537e-05	0	0	0	0	0	0	0	0	0	0	0	0	0	0	4.90643e-05	0	0	0	5.3626e-05	0	0	0	1	0	0	0	0	0	0	0	0	0	0	0	0	0	0	1	0	0	0
IPI00043073,IPI00298800,IPI00384414,IPI00922817,	GYPA HCG2026259, isoform CRA_f	117.5	0.27476	5.25152	2	0	0	0	0	0	0	0	0	0	0	0	0	0	0	0	0	0.000263949	0.000273925	0	0	0	0	0	0	0	0	0	0	0	0	0	0	0	0	0	0	0	0	0	2	2	0	0	0
IPI00045109,IPI00219037,	HIST1H2AA Histone H2A type 1-A	137	0.270592	11.446	3	0	0	0	0	0	0	0.000359424	0	0	0	0	0.00114306	0	0.000832983	0	0	0	0	0	0	0	0	0	0	0	0	0	0	0	2	0	0	0	0	10	0	8	0	0	0	0	0	0	0
IPI00045660,IPI00552131,IPI00646750,IPI00830136,	C1orf31 Isoform 1 of Uncharacterized protein C1orf31	128.75	0.13408	9.44747	2	0	0	0	0	0	0	0	0	0	0	0	0	0	0	0	0.00064828	0.000602214	0	0	0	0	0	0	0	0	0	0	0	0	0	0	0	0	0	0	0	0	0	6	5	0	0	0	0
IPI00046828,	CCDC58 Coiled-coil domain-containing protein 58	144	0.284722	7.95789	3	0	0	0	0	0.00047386	0	0	0	0	0	0	0.000326248	0	0.000198123	0	0.000483021	0	0.000223515	0	0.000452351	0.000237987	0	0.000377969	0	0	0	0	3	0	0	0	0	0	0	3	0	2	0	5	0	2	0	4	2
IPI00060148,	CCDC127 Coiled-coil domain-containing protein 127	260	0.107692	9.61579	3	0	0	0	0	0	0	0	0	0	0	0	0	0	0	0	0	0	0.000185689	0	0.000125266	0.000263616	0	0	0	0	0	0	0	0	0	0	0	0	0	0	0	0	0	0	0	3	0	2	4
IPI00061108,IPI00556600,	MRRF Isoform 1 of Ribosome-recycling factor, mitochondrial	240	0.390784	10.4279	7	0	0	0	0	0	0	0	0	0	0	0	0	0	0	0	0	0	0.000134109	7.32731e-05	0	0.000142792	0	0	0	0	0	0	0	0	0	0	0	0	0	0	0	0	0	0	0	2	1	0	2
IPI00065501,	JSRP1 Junctional sarcoplasmic reticulum protein 1	331	0.241692	10.1361	7	0.000245048	0	0.00050466	0	0	0	0.000223147	0	0	0	0	0.000141933	0	0	0.000136651	0.000210136	0.000140547	0	0.000318771	9.83965e-05	0	0.00010628	0.000274057	4	0	7	0	0	0	3	0	0	0	0	3	0	0	3	5	3	0	6	2	0
IPI00075248,IPI00794543,IPI00916600,IPI00916768,	CALM1 Calmodulin; CALM3; CALM2	161.5	0.244762	3.92235	2	0	0	0	0	0	0	0	0	0	0	0	0	0	0	0	0	0	0	0	0	0	0	0.000224675	0	0	0	0	0	0	0	0	0	0	0	0	0	0	0	0	0	0	0	0	0
IPI00096066,	SUCLG2 Succinyl-CoA ligase [GDP-forming] subunit beta, mitochondrial	432	0.180556	6.17712	6	0	0	0	0	0	0	0	0	0	7.19347e-05	3.54877e-05	0	0.000102667	0	0	0	0	7.4505e-05	4.07073e-05	3.76959e-05	0	0	4.19966e-05	0	0	0	0	0	0	0	0	0	2	1	0	3	0	0	0	0	2	1	1	0
IPI00099871,IPI00852745,	MRPL40 39S ribosomal protein L40, mitochondrial	184	0.424548	10.172	6	0.000440821	0.000232198	0	0.000249069	0	0	0	0	0	0.000675561	0.000833189	0	0	0	0	0	0	0	0	0	0.000372502	0	0	4	2	0	2	0	0	0	0	0	8	10	0	0	0	0	0	0	0	0	0	4
IPI00100980,	EHD2 EH domain-containing protein 2	543	0.06814	6.42162	3	0	0	0	0	0	0	0	0	0	0	0	0	0	0	0	0	0	0	0	0	0	0	0.000167058	0	0	0	0	0	0	0	0	0	0	0	0	0	0	0	0	0	0	0	0	0
IPI00103481,IPI00793641,IPI00794272,IPI00910219,	KRT72 Isoform 1 of Keratin, type II cytoskeletal 72	472	0.0492343	6.23243	2	0	0	0	0	0	0	0	0	0	0	0	0	0	0	0	0	0	0	0	0.000138005	0	0	0	0	0	0	0	0	0	0	0	0	0	0	0	0	0	0	0	0	0	0	4	0
IPI00155601,	MACROD1 MACRO domain-containing protein 1	325	0.101539	10.0084	2	0	0	0.000513977	0	0.00062987	0	0	0	0	0	0	0	0	0	0	0	0	0	0	0	0	0	0	0	0	7	0	9	0	0	0	0	0	0	0	0	0	0	0	0	0	0	0	0
IPI00157820,IPI00220566,IPI00377218,IPI00853011,IPI00853628,	TXNRD2 Isoform 2 of Thioredoxin reductase 2, mitochondrial	512.8	0.152201	7.36678	4	0	0	0	0	0	0	0	0	0	0	0	0	0	0	0	0	0	0	0	3.17563e-05	0	3.43005e-05	0	0	0	0	0	0	0	0	0	0	0	0	0	0	0	0	0	0	0	0	1	0
IPI00160021,IPI00455153,IPI00917200,	NFU1 HIRA interacting protein 5 isoform 1	244	0.11496	4.80245	2	0	0	0	0	0	0	0	0	0	0	0.000188492	0	0	0	0	0	0	0	0	0	0	0	0	0	0	0	0	0	0	0	0	0	0	3	0	0	0	0	0	0	0	0	0	0
IPI00160421,	MRPL18 39S ribosomal protein L18, mitochondrial	180	0.272222	9.98709	5	0.000337963	0	0	0	0	0	0	0	0	0.000604252	0.000340682	0	0	0.000237747	0.000167524	0.00023185	0	0.000268218	0.000293093	0	0.000285584	0	0.000302376	3	0	0	0	0	0	0	0	0	7	4	0	0	3	2	3	0	3	3	0	3
IPI00163387,IPI00619974,IPI00872818,IPI00894346,	C6orf136 Isoform 1 of Uncharacterized protein C6orf136	338.25	0.10886	9.53982	3	0	0	0	0	0	0	0	0	0	0	0	0	0	0	0	0	0	0	5.19898e-05	4.81437e-05	0	0	0	0	0	0	0	0	0	0	0	0	0	0	0	0	0	0	0	0	0	1	1	0
IPI00166038,	C3orf45 Uncharacterized protein C3orf45	164	0.0914634	5.98625	2	0	0	0	0	0	0	0	0	0	0	0	0	0	0	0	0	0	0	0	0.000297889	0	0	0	0	0	0	0	0	0	0	0	0	0	0	0	0	0	0	0	0	0	0	3	0
IPI00166642,IPI00871210,IPI00887749,	D2HGDH Isoform 1 of D-2-hydroxyglutarate dehydrogenase, mitochondrial	564.333	0.148705	8.63608	4	0	0	0	0	0	0	0	0	0	0	0	0.000166497	0.000157184	0	0	0	0	0	0	0	0	0	0	0	0	0	0	0	0	0	0	0	0	0	6	6	0	0	0	0	0	0	0	0
IPI00166865,	CISD2 CDGSH iron sulfur domain-containing protein 2	135	0.2	10.2498	2	0	0	0	0	0	0	0	0	0	0	0	0	0	0	0	0	0	0	0	0	0	0	0.000403168	0	0	0	0	0	0	0	0	0	0	0	0	0	0	0	0	0	0	0	0	0
IPI00168081,IPI00926293,	SMYD1 SET and MYND domain-containing protein 1	483.5	0.0744705	7.06956	3	0	0	0	0	0	0	0	0	0	0	0	0	0	0	6.23666e-05	5.7543e-05	0	0	7.27427e-05	0	0	0	0.00011257	0	0	0	0	0	0	0	0	0	0	0	0	0	0	2	2	0	0	2	0	0
IPI00171459,IPI00909286,	HSDL1 Hydroxysteroid dehydrogenase-like protein 1	302.5	0.09	9.09612	2	0	0	0	0	0	0	0	0	0	0	0	0	0	0	0	0	0	0	0	0.0001615	0	0	0	0	0	0	0	0	0	0	0	0	0	0	0	0	0	0	0	0	0	0	3	0
IPI00172591,	MRPL17 39S ribosomal protein L17, mitochondrial	175	0.137143	10.6402	3	0	0	0	0.000523758	0	0	0	0	0	0.000799092	0	0	0	0.00024454	0	0	0	0.000275882	0.000401956	0.000279165	0	0	0	0	0	0	4	0	0	0	0	0	9	0	0	0	3	0	0	0	3	4	3	0
IPI00172594,IPI00719120,	MRPL28 39S ribosomal protein L28, mitochondrial	256	0.140625	8.38113	2	0	0	0	0	0	0	0	0	0	0	0	0	0	0	0	0	0	0.000125727	0	0	0	0	0	0	0	0	0	0	0	0	0	0	0	0	0	0	0	0	0	0	2	0	0	0
IPI00173461,	JPH1 Junctophilin-1	661	0.0529501	9.78422	3	0	0	0	0	0	0	0	0	0	0	0	0	0	4.31614e-05	0	4.20908e-05	0	0	0	0	0	0	0	0	0	0	0	0	0	0	0	0	0	0	0	0	2	0	2	0	0	0	0	0
IPI00174190,	PTPMT1 Isoform 1 of Protein-tyrosine phosphatase mitochondrial 1	201	0.253731	10.2367	4	0	0	0	0	0	0	0	0	0	0	0	0	0	0	0	0	0	0	8.74903e-05	0	0.000170498	8.7509e-05	0	0	0	0	0	0	0	0	0	0	0	0	0	0	0	0	0	0	0	1	0	2
IPI00176527,IPI00215878,	ATP5EP2 ATP synthase subunit epsilon-like protein, mitochondrial	51	0.313725	10.6617	2	0	0	0.000935812	0	0.00178394	0	0	0	0	0	0	0	0.00115953	0.00139851	0.00118252	0.00190935	0	0	0.00137926	0.000957919	0.000671963	0	0.00106721	0	0	2	0	4	0	0	0	0	0	0	0	4	5	4	7	0	0	4	3	2
IPI00176903,IPI00514023,	PTRF Isoform 1 of Polymerase I and transcript release factor	376.5	0.162227	5.09821	4	0.000592444	0	0.00038029	0	0	0	0	0	0	0	0	0.000374341	0.000314136	0	0	0	0	0	0	0	0.000136534	0	0.000674623	11	0	6	0	0	0	0	0	0	0	0	9	8	0	0	0	0	0	0	0	3
IPI00177428,IPI00748354,	CHCHD4 Isoform 2 of Mitochondrial intermembrane space import and assembly protein 40	148.5	0.283371	3.99212	2	0	0	0	0	0	0	0	0	0	0	0.000412947	0	0.000199111	0.000288178	0.000203059	0.00028103	0	0	0	0	0.000346163	0.00035534	0.000244344	0	0	0	0	0	0	0	0	0	0	4	0	2	3	2	3	0	0	0	0	3
IPI00177808,	C9orf89 Isoform 2 of Bcl10-interacting CARD protein	183	0.333333	8.21519	6	0.000221615	0	0	0	0	0	0	0	0	0.000933972	0.000502645	0.00025672	0	0.000467699	0	0	0	0.000351761	0.000384384	0.000711896	0.000374537	0	0.000396558	2	0	0	0	0	0	0	0	0	11	6	3	0	6	0	0	0	4	4	8	4
IPI00179330,IPI00798155,	UBB; RPS27A ubiquitin and ribosomal protein S27a precursor; UBC	131	0.372339	10.5485	4	0	0	0	0	0	0	0	0	0	0	0	0.000119541	0	0	0	0	0	0	0	0	0	0	0.000138493	0	0	0	0	0	0	0	0	0	0	0	1	0	0	0	0	0	0	0	0	0
IPI00180408,	MYH15 Myosin-15	1946	0.00924974	5.58579	2	0	8.78199e-05	0	0	0	0	0	0	0	0	0	0	0	0	0	0	0	0	0	0	0	0	0	0	8	0	0	0	0	0	0	0	0	0	0	0	0	0	0	0	0	0	0	0
IPI00182933,IPI00397860,IPI00645474,IPI00871858,	CYB5A Isoform 2 of Cytochrome b5	113.5	0.305451	4.77078	2	0	0	0	0	0	0	0	0	0	0	0	0	0	0	0	0	0	0	0	0	0.00030194	0	0	0	0	0	0	0	0	0	0	0	0	0	0	0	0	0	0	0	0	0	0	2
IPI00183171,	SIRT3 cDNA FLJ60939, highly similar to NAD-dependent deacetylase sirtuin-3, mitochondrial	417	0.0983213	8.33189	3	0	0	0	0	0	0	0	0	0	7.45223e-05	3.67642e-05	3.75538e-05	7.09065e-05	0	3.61562e-05	0	0	0	0	0	0	0	0	0	0	0	0	0	0	0	0	0	2	1	1	2	0	1	0	0	0	0	0	0
IPI00183526,IPI00444262,IPI00604620,IPI00827674,IPI00916188,	NCL NCL protein	555.8	0.067756	4.48076	2	0	0	0	0	0	0	0	0	0	0	0	0	0	0	0	0	0	0	0	5.85988e-05	0	0	0	0	0	0	0	0	0	0	0	0	0	0	0	0	0	0	0	0	0	0	2	0
IPI00183695,	S100A10 Protein S100-A10	97	0.278351	7.50949	2	0	0	0.000492025	0	0	0	0	0	0	0	0	0	0	0	0	0	0	0	0	0	0	0	0	0	0	2	0	0	0	0	0	0	0	0	0	0	0	0	0	0	0	0	0	0
IPI00183965,IPI00219983,IPI00219984,	CACNB1 Isoform 1 of Voltage-dependent L-type calcium channel subunit beta-1	533	0.0605476	8.1822	2	0	0	0	0	0	0	0	0	0	0	0	0	0	0	8.48619e-05	0.000104398	0	0	0	0	0	0	0	0	0	0	0	0	0	0	0	0	0	0	0	0	0	3	4	0	0	0	0	0
IPI00185859,IPI00790292,IPI00796762,IPI00908432,	MRPL45 39S ribosomal protein L45, mitochondrial	299.25	0.0977424	9.41295	2	0	0	0	0	0	0	0	0	0	0	0	0	0	0	0	0	0	0	0	0.000108836	0	0	0	0	0	0	0	0	0	0	0	0	0	0	0	0	0	0	0	0	0	0	2	0
IPI00215914,IPI00215917,	ARF1 ADP-ribosylation factor 1	181	0.259669	7.20038	3	0	0	0	0	0	0	0	0	0	0	0	0	0	0	0	0	0	0	0	0	0.000284007	0	0	0	0	0	0	0	0	0	0	0	0	0	0	0	0	0	0	0	0	0	0	3
IPI00215979,	BPGM Bisphosphoglycerate mutase	259	0.158301	6.51908	3	0	0	0	0	0	0	0	0	0	0	0	0.000302315	0	0	0	0	0	0	0	0	0.000330793	0	0	0	0	0	0	0	0	0	0	0	0	0	5	0	0	0	0	0	0	0	0	5
IPI00216236,IPI00657955,	TNNI2 Troponin I, fast skeletal muscle	182	0.175824	9.51461	4	0	0	0	0	0	0	0	0	0	0	0	0	0.00113723	0.000391891	0.00207103	0.00244589	0.000852033	0	0	0	0	0	0.000299053	0	0	0	0	0	0	0	0	0	0	0	0	14	5	25	32	10	0	0	0	0
IPI00216461,	ACYP2 Acylphosphatase-2	99	0.282828	10.0097	4	0	0	0	0	0	0	0	0	0	0	0	0	0	0.000864535	0.000761471	0.000421546	0.000626546	0	0	0	0	0	0	0	0	0	0	0	0	0	0	0	0	0	0	0	6	5	3	4	0	0	0	0
IPI00216697,IPI00297532,IPI00374973,IPI00646300,IPI00654646,IPI00744408,IPI00744846,IPI00744895,IPI00744986,IPI00745348,IPI00747536,IPI00747552,IPI00748074,IPI00748330,IPI00748439,IPI00748895,IPI00749301,	ANK1 Isoform Er1 of Ankyrin-1	1790	0.0706902	6.46921	6	0	0	0	0	2.54137e-05	0	0	0	0	0	2.56939e-05	5.24914e-05	0	0	0	0	0	0	0	0	1.91453e-05	0	0	0	0	0	0	2	0	0	0	0	0	3	6	0	0	0	0	0	0	0	0	2
IPI00216704,IPI00783228,IPI00914949,	SPTB Isoform 2 of Spectrin beta chain, erythrocyte	2265.67	0.221053	5.00319	34	8.95002e-06	0	0	0	1.00391e-05	0	0	0	7.19694e-06	0	1.3533e-05	6.91184e-05	0	0	0	0	6.84434e-06	0	0	0	3.78146e-05	0	0	1	0	0	0	1	0	0	0	1	0	2	10	0	0	0	0	1	0	0	0	5
IPI00216983,	- cDNA FLJ52895, highly similar to Carbonic anhydrase 3; CA3 Carbonic anhydrase 3	260	0.292308	7.37459	5	0	0	0	0	0	0	0	0	0	0	0	0	0	0	5.79889e-05	0	0.000119285	0	6.76367e-05	0	0	0	0.000209337	0	0	0	0	0	0	0	0	0	0	0	0	0	0	1	0	2	0	1	0	0
IPI00217553,	MRPL41 39S ribosomal protein L41, mitochondrial	137	0.350365	10.1297	2	0	0	0	0	0	0	0	0	0	0	0	0	0	0	0	0	0	0.000234936	0	0	0	0	0	0	0	0	0	0	0	0	0	0	0	0	0	0	0	0	0	0	2	0	0	0
IPI00217561,IPI00217562,IPI00217563,IPI00293305,IPI00549336,	ITGB1 Isoform Beta-1C of Integrin beta-1	806.4	0.0396936	5.09949	2	0	0	0	0	0	0	0	0	0	0	0	3.88391e-05	0	0	0	0	0	0	0	0	0	0	8.99927e-05	0	0	0	0	0	0	0	0	0	0	0	2	0	0	0	0	0	0	0	0	0
IPI00217745,IPI00293425,IPI00873180,IPI00877022,	FXN Isoform 2 of Frataxin, mitochondrial	187	0.156309	8.97938	2	0	0	0	0	0	0	0	0	0	0.000249271	0	0.000251229	0	0.000228847	0	0.000223171	0	0	0.000188081	0.000174167	0	0.000188121	0	0	0	0	0	0	0	0	0	0	3	0	3	0	3	0	3	0	0	2	2	0
IPI00217966,IPI00910754,	LDHA Isoform 2 of L-lactate dehydrogenase A chain; LDHA L-lactate dehydrogenase	317.5	0.115555	7.91981	3	0	0	0	0	0	0	0	0	0	0	0	0	0	0	0	0	0	0	0	0	0	0	0	0	0	0	0	0	0	0	0	0	0	0	0	0	0	0	0	0	0	0	0	0
IPI00218463,	Magmas Mitochondrial import inner membrane translocase subunit Tim16	125	0.392	10.2921	3	0	0	0	0	0	0	0	0	0	0	0	0.000751676	0.000827904	0	0	0.000333864	0	0	0	0	0	0	0	0	0	0	0	0	0	0	0	0	0	0	6	7	0	0	3	0	0	0	0	0
IPI00218653,IPI00296091,IPI00749235,IPI00793449,	DTNA Isoform 4 of Dystrobrevin alpha	585.25	0.100247	7.99624	4	0	0	0	0	0	0	0	0	0	0	0	0	0	0	0	0	0	0	0	0	0	0	0.000247997	0	0	0	0	0	0	0	0	0	0	0	0	0	0	0	0	0	0	0	0	0
IPI00219018,	GAPDH Glyceraldehyde-3-phosphate dehydrogenase	335	0.361194	8.73206	11	0	0	0.000142467	0	0	0	0	0	0	0	0	0	0	0	0	0	4.62896e-05	0	0	0	0	0	0	0	0	2	0	0	0	0	0	0	0	0	0	0	0	0	0	1	0	0	0	0
IPI00219219,	LGALS1 Galectin-1	135	0.325926	5.14634	4	0	0	0	0	0	0	0	0	0	0	0	0	0	0	0	0	0	0	0	0	0	0	0.00107511	0	0	0	0	0	0	0	0	0	0	0	0	0	0	0	0	0	0	0	0	0
IPI00219291,IPI00220300,IPI00873259,	ATP5J2 Isoform 2 of ATP synthase subunit f, mitochondrial	93.3333	0.257648	10.261	2	0	0	0	0	0	0	0	0	0	0	0	0	0	0	0	0	0	0	0	0	0	0	0	0	0	0	0	0	0	0	0	0	0	0	0	0	0	0	0	0	0	0	0	0
IPI00219365,IPI00872814,	MSN Moesin	576.5	0.0294883	6.31774	1	0	0	0	0	0	0	0	0	0	0	0	0	0	0	2.61529e-05	0	0	0	0	0	0	0	0	0	0	0	0	0	0	0	0	0	0	0	0	0	0	1	0	0	0	0	0	0
IPI00219446,IPI00795288,IPI00908746,	PEBP1 Phosphatidylethanolamine-binding protein 1	179.333	0.191548	7.29523	2	0.000226146	0	0	0	0	0	0	0	0	0	0	0	0	0	0	0	0.000172941	0	0	0.000181613	0.000286646	0.000196163	0.000202333	2	0	0	0	0	0	0	0	0	0	0	0	0	0	0	0	2	0	0	2	3
IPI00219613,IPI00787827,	PITRM1 Isoform 1 of Presequence protease, mitochondrial	1037.5	0.0963856	6.96609	6	0	0	0	0	0	0	0	0	3.1433e-05	0	0	0.000150939	0	0	0	0	0	0	0	0	0	0	0	0	0	0	0	0	0	0	0	2	0	0	10	0	0	0	0	0	0	0	0	0
IPI00219796,	TNNC2 Troponin C, skeletal muscle	160	0.45625	3.81186	6	0	0	0	0	0	0.000600897	0	0	0	0	0.000191633	0	0.0002772	0	0.000565392	0.000956382	0.000290756	0	0	0.000712452	0	0.000109933	0.0012473	0	0	0	0	0	4	0	0	0	0	2	0	3	0	6	11	3	0	0	7	0
IPI00219806,	S100A7 Protein S100-A7	101	0.435644	6.78232	6	0	0	0	0	0	0	0	0	0	0	0	0	0	0	0	0	0	0.00175271	0	0	0	0	0	0	0	0	0	0	0	0	0	0	0	0	0	0	0	0	0	0	11	0	0	0
IPI00219833,	TIMM17B Mitochondrial import inner membrane translocase subunit Tim17-B	172	0.127907	9.2243	2	0	0	0	0	0	0	0	0	0	0	0	0	0	0	0	0	0	0	0.000306725	0	0	0	0	0	0	0	0	0	0	0	0	0	0	0	0	0	0	0	0	0	0	3	0	0
IPI00219861,	ACP1 Isoform 1 of Low molecular weight phosphotyrosine protein phosphatase	158	0.183544	6.73073	2	0	0	0	0	0	0	0	0	0	0	0	0	0	0	0	0	0	0	0	0	0.000325349	0	0	0	0	0	0	0	0	0	0	0	0	0	0	0	0	0	0	0	0	0	0	3
IPI00220150,IPI00335068,IPI00646235,	IDH3G Isocitrate dehydrogenase [NAD] subunit gamma, mitochondrial	352.667	0.0868488	8.64599	2	0	0	0.000202995	0	0	0	0	0	0	0	0	0	0	0	0	0	0	0	0	0	0	0	0	0	0	3	0	0	0	0	0	0	0	0	0	0	0	0	0	0	0	0	0	0
IPI00220194,IPI00909237,	SLC2A1 Solute carrier family 2, facilitated glucose transporter member 1	463	0.0758917	8.67912	3	0	0	0	0	0	0	0	0	0	0	3.31116e-05	3.38227e-05	0	0	0	0	0	0	0	0	0	0	0	0	0	0	0	0	0	0	0	0	0	1	1	0	0	0	0	0	0	0	0	0
IPI00220272,	TRDN Putative uncharacterized protein TRDN (Fragment); TRDN Triadin	729	0.0987654	10.1736	9	8.34476e-05	0	0.000458278	0	0	0	0.000135092	0	0	0	8.41189e-05	0.000257776	0	0.000156541	0	7.63293e-05	0.000148901	0	4.82457e-05	6.70149e-05	0	4.8256e-05	0	3	0	14	0	0	0	4	0	0	0	4	12	0	8	0	4	7	0	2	3	0
IPI00220301,	PRDX6 Peroxiredoxin-6	224	0.258929	6.29344	4	0	0	0	0	0.000406166	0	0	0	0.000436764	0	0.000342203	0.000559283	0	0	0	0	0	0	0	0	0.000611967	0.000157047	0	0	0	0	0	4	0	0	0	6	0	5	8	0	0	0	0	0	0	0	0	8
IPI00220467,IPI00395442,IPI00643758,	TNNT1 Isoform 2 of Troponin T, slow skeletal muscle; TNNT3 29 kDa protein; TNNT3 Putative uncharacterized protein TNNT3	263.667	0.246956	5.93183	5	0	0.00121529	0	0	0	0	0	0	0	0	0	0	0	0	0.000743373	0.00015828	0	0	0	0	0	0	0	0	15	0	0	0	0	0	0	0	0	0	0	0	0	13	3	0	0	0	0	0
IPI00220644,	PKM2 Isoform M1 of Pyruvate kinase isozymes M1/M2	531	0.387947	7.78202	15	0	0	0	0	0	0	0	0	0	0	0	0	0	0	2.83938e-05	7.85933e-05	5.84068e-05	0	0	0	0	0	6.83335e-05	0	0	0	0	0	0	0	0	0	0	0	0	0	0	1	3	2	0	0	0	0
IPI00220706,	HBB Hemoglobin subunit beta; HBG1 Hemoglobin subunit gamma-1; HBG2; HBG1 Hemoglobin subunit gamma-2	147	0.544218	7.23461	6	0	0	0	0	0	0	0	0.000154062	0	0	0	0.00010653	0	0	0	0	0	0	0	0	0	0	0	0	0	0	0	0	0	0	1	0	0	0	1	0	0	0	0	0	0	0	0	0
IPI00220906,	ACOT1 Acyl-coenzyme A thioesterase 1; ACOT2 Isoform 1 of Acyl-coenzyme A thioesterase 2, mitochondrial	483	0.461698	8.77935	15	0	0	0	0	0	0	0	0	0	0	0	0	0	0	0	0	0	0	0	0	0	0.000182084	0	0	0	0	0	0	0	0	0	0	0	0	0	0	0	0	0	0	0	0	0	0
IPI00221226,	ANXA6 Annexin A6; ANXA6 annexin VI isoform 2	673	0.433878	5.27764	20	0	0	0.00017729	0	0	0	0	0	0	0	0	0.000116344	0	0	0	0	0	0	0	0	0	0	2.69577e-05	0	0	5	0	0	0	0	0	0	0	0	5	0	0	0	0	0	0	0	0	0
IPI00221234,IPI00909694,	ALDH7A1 aldehyde dehydrogenase 7 family, member A1	520.5	0.0654044	8.08168	3	0	0	0	0	0	0	0	0	0	0	0	0	0	0	0	0	0	0	6.75718e-05	6.2573e-05	9.87612e-05	0	0	0	0	0	0	0	0	0	0	0	0	0	0	0	0	0	0	0	0	2	2	3
IPI00241841,	KRT79 Keratin, type II cytoskeletal 79	535	0.0990654	7.22211	5	0	0	0	0	0	0	0	0	0	0	0	0	0	0	0	0	0	0.000270725	0	0	0	0	0	0	0	0	0	0	0	0	0	0	0	0	0	0	0	0	0	0	9	0	0	0
IPI00249656,	MURC Muscle-related coiled-coil protein	364	0.134615	8.64191	3	0	0	0	0	0	0	0	0	0	0	0	0.000344174	0	0	0	0	0	0	0	0	0	0	0	0	0	0	0	0	0	0	0	0	0	0	8	0	0	0	0	0	0	0	0	0
IPI00259102,IPI00657648,	EPDR1 Isoform 1 of Mammalian ependymin-related protein 1	284	0.151111	8.20754	4	0	0	0.000420127	0	0	0	0	0	0.00011483	0	0	0	0	0.000251141	0	0	0	0	0	0	0.00012067	0	0	0	0	5	0	0	0	0	0	2	0	0	0	0	5	0	0	0	0	0	0	2
IPI00290078,IPI00797452,	KRT4 keratin 4	534	0.0891403	7.5818	4	0	0	0	0	0	0	0	0	0.0035421	0	0	0	0	0	0	0	0	0	0	0	0	0	0	0	0	0	0	0	0	0	0	116	0	0	0	0	0	0	0	0	0	0	0	0
IPI00290614,	ENDOG Endonuclease G, mitochondrial	297	0.215488	9.82666	5	0	0	0.00032139	0	0.000306334	0	0	0	0	0.000104632	0.000309711	0	9.95556e-05	0	0.000456882	0.000327869	0.000104424	0.000162556	0	0.000219322	0	0	0	0	0	4	0	4	0	0	0	0	2	6	0	2	0	9	7	2	3	0	4	0
IPI00291005,IPI00916111,	MDH1 Malate dehydrogenase, cytoplasmic	343	0.166295	7.81559	5	0	0	0	0	0	0	0	0	0	0	0	0	0	0	0	0	0	0	0	0	4.99565e-05	5.12808e-05	0	0	0	0	0	0	0	0	0	0	0	0	0	0	0	0	0	0	0	0	0	1
IPI00291136,	COL6A1 Collagen alpha-1(VI) chain	1028	0.202335	5.05398	15	0	0	0	0	0	0	0	0	0.000237926	0	0	0.000517935	0	4.16289e-05	0	0	0	0	0	0	0.000216689	0	0.000564748	0	0	0	0	0	0	0	0	15	0	0	34	0	3	0	0	0	0	0	0	13
IPI00291560,IPI00398768,	ARG1 Isoform 1 of Arginase-1	326	0.251572	7.25277	6	0	0	0	0	0	0	0	0	0	0	0	0	0	0	0	0	0	0.000444288	0	0	0	0	0	0	0	0	0	0	0	0	0	0	0	0	0	0	0	0	0	0	9	0	0	0
IPI00292130,	DPT Dermatopontin	201	0.0945274	4.43675	2	0	0	0	0	0	0	0	0	0	0	0	0	0	0	0	0	0	0	0	0	0	0	0.000812352	0	0	0	0	0	0	0	0	0	0	0	0	0	0	0	0	0	0	0	0	0
IPI00293088,IPI00883772,	GAA Lysosomal alpha-glucosidase	952	0.0567227	5.90839	3	0	0	0	0	0	0	0	0	0	0	0	0	0	0	0	0	0	0	3.69444e-05	5.13171e-05	7.19961e-05	7.39047e-05	0	0	0	0	0	0	0	0	0	0	0	0	0	0	0	0	0	0	0	2	3	4
IPI00293876,	COX6A2 Cytochrome c oxidase subunit 6A2, mitochondrial	97	0.360825	11.3739	2	0	0	0	0	0	0	0	0	0	0	0.000632193	0	0	0	0	0.00129071	0	0	0	0	0	0	0	0	0	0	0	0	0	0	0	0	0	4	0	0	0	0	9	0	0	0	0	0
IPI00294578,IPI00871843,	TGM2 Isoform 1 of Protein-glutamine gamma-glutamyltransferase 2	703	0.0626213	5.01407	3	0	0	0	0	0	0	0	0	0	0	0	0	0	0	0	0	0	0	0	0	0	0	0.000103229	0	0	0	0	0	0	0	0	0	0	0	0	0	0	0	0	0	0	0	0	0
IPI00294959,IPI00909817,	LDB3 Isoform 2 of LIM domain-binding protein 3; LDB3 Isoform 3 of LIM domain-binding protein 3; LDB3 Isoform 6 of LIM domain-binding protein 3	674.5	0.123955	8.13437	6	0	3.16711e-05	0	0	0	3.56351e-05	0	0	0	0	0	0	0	0	0.000201177	6.18726e-05	2.29904e-05	0	0	4.82865e-05	0	0	0	0	1	0	0	0	1	0	0	0	0	0	0	0	0	9	3	1	0	0	2	0
IPI00295098,	SRPRB Signal recognition particle receptor subunit beta	271	0.177122	9.47386	3	0.000224477	0	0.000264168	0	0	0	0	0	0	0	0	0	0	0	0	0	0	0	0	0.000120182	0	0	0	3	0	3	0	0	0	0	0	0	0	0	0	0	0	0	0	0	0	0	2	0
IPI00295414,	COL15A1 Collagen alpha-1(XV) chain	1388	0.0273775	4.6293	3	0	0	0	0	0	0	0	0	0	0	0	0	0	0	0	0	0	0	0	0	0	0	5.2284e-05	0	0	0	0	0	0	0	0	0	0	0	0	0	0	0	0	0	0	0	0	0
IPI00295741,IPI00909303,	CTSB Cathepsin B	306	0.218224	6.43911	5	0	0	0	0	0	0	0	0	0	0	0	0	0	0	0	0	0	0.000473326	0	0	0	0	0	0	0	0	0	0	0	0	0	0	0	0	0	0	0	0	0	0	9	0	0	0
IPI00296022,IPI00455418,	UQCRH Cytochrome b-c1 complex subunit 6, mitochondrial	91	0.351648	4.09588	2	0	0	0	0	0	0	0	0	0.000358371	0	0	0	0	0	0	0.00152868	0	0	0	0	0	0	0	0	0	0	0	0	0	0	0	2	0	0	0	0	0	0	10	0	0	0	0	0
IPI00296922,	LAMB2 Laminin subunit beta-2	1798	0.176863	6.49885	22	0	0	0	0	0	0	0	0	0	0	0	6.09674e-05	0	0	0	0	0	0	0	0	0	0	0.000322893	0	0	0	0	0	0	0	0	0	0	0	7	0	0	0	0	0	0	0	0	0
IPI00297084,	DDOST dolichyl-diphosphooligosaccharide-protein glycosyltransferase precursor	456	0.197368	6.51793	5	0	0	0	0	0	0	0	0	0	0	0	3.43419e-05	0	0	0	0	0	0	0	0	0	0	0	0	0	0	0	0	0	0	0	0	0	0	1	0	0	0	0	0	0	0	0	0
IPI00297646,	COL1A1 Collagen alpha-1(I) chain	1464	0.0150273	5.47205	2	0	0	0	0	0	0	0	0	0	0	0	3.209e-05	0	0	0	0	0	0	0	0	0	0	4.95698e-05	0	0	0	0	0	0	0	0	0	0	0	3	0	0	0	0	0	0	0	0	0
IPI00298281,	LAMC1 Laminin subunit gamma-1	1609	0.211311	4.75528	26	7.56163e-05	0	0	0	0	0	0	0	7.09392e-05	0	0	0.000389308	0	0	0	0	0	0	0	0	7.45466e-05	0	0.000687815	6	0	0	0	0	0	0	0	7	0	0	40	0	0	0	0	0	0	0	0	7
IPI00298497,	FGB Fibrinogen beta chain	491	0.185336	8.38412	6	0	0	0	0	0	0	0	0	9.96286e-05	0	0	0	0	0	0.000429898	0	0	0	0	0	0	0	0	0	0	0	0	0	0	0	0	3	0	0	0	0	0	14	0	0	0	0	0	0
IPI00299010,	SPG7 Isoform 1 of Paraplegin	795	0.0880503	9.07348	4	0	0	0	0	0	0	0	0	0	1.95445e-05	0	0	1.85962e-05	0	0	0	0	2.02429e-05	0	0	0	2.21249e-05	2.28208e-05	0	0	0	0	0	0	0	0	0	1	0	0	1	0	0	0	0	1	0	0	0
IPI00299145,	KRT6A Keratin, type II cytoskeletal 6A; KRT6B Keratin, type II cytoskeletal 6B; KRT6C Keratin, type II cytoskeletal 6C	564	0.281915	8.16366	15	0	0	0	0	0	0	8.73069e-05	0	0	8.26484e-05	0	0	0	0	0	0	0	0	0	0	3.03813e-05	0	0.000160838	0	0	0	0	0	0	2	0	0	3	0	0	0	0	0	0	0	0	0	0	1
IPI00299571,IPI00644989,	PDIA6 Isoform 2 of Protein disulfide-isomerase A6	466	0.228178	4.82634	6	0	0	0.000307251	0	0	0	0	0	0	0	0	0	0	0.000153056	0	0	6.65537e-05	0	0	0	0	0	0	0	0	6	0	0	0	0	0	0	0	0	0	0	5	0	0	2	0	0	0	0
IPI00300725,IPI00909059,	KRT6A Keratin, type II cytoskeletal 6A	549.5	0.145688	8.16216	9	3.69022e-05	3.88757e-05	0	0	4.13927e-05	0	0	0	2.9674e-05	0	0	0	0	0.000103839	0	0	0	0.000292868	0	2.96353e-05	0	0.000256077	0	1	1	0	0	1	0	0	0	1	0	0	0	0	4	0	0	0	10	0	1	0
IPI00301109,IPI00470502,IPI00470503,	PPA2 Isoform 1 of Inorganic pyrophosphatase 2, mitochondrial	329.333	0.201037	7.66351	5	0	0	0	0	0	0	0	0	0	0	0	0	0	0	0	0	0	0	0	0	0	5.34088e-05	0	0	0	0	0	0	0	0	0	0	0	0	0	0	0	0	0	0	0	0	0	0
IPI00301464,IPI00921809,	SGCA Isoform SGCA-1 of Alpha-sarcoglycan	342.5	0.118794	6.21021	3	0	0	0	0	0	0	0	0	0	0	0	0	0	0	0	0	0	0	0	0	0	0	0.000370796	0	0	0	0	0	0	0	0	0	0	0	0	0	0	0	0	0	0	0	0	0
IPI00302329,	MYH8 Myosin-8	1937	0.0320083	5.47127	5	0	0	0	0	0	0	0	0	0	0	0	0	0	0	0	0	0	0	0	0	0	0	0.000346553	0	0	0	0	0	0	0	0	0	0	0	0	0	0	0	0	0	0	0	0	0
IPI00302673,IPI00783728,	ATPAF1 ATP synthase mitochondrial F1 complex assembly factor 1	294	0.0965291	8.61697	2	0	0	0	0	0	0	0	0	0	0	0	0	0	0	0	0	0	0	0	0	0.000174848	0	0	0	0	0	0	0	0	0	0	0	0	0	0	0	0	0	0	0	0	0	0	3
IPI00303120,	TMEM143 Isoform 1 of Transmembrane protein 143	459	0.276689	10.1491	9	0	0	0.000103979	0	0	5.23657e-05	0	0	0	0	6.68003e-05	0	6.44183e-05	0	3.28478e-05	0.000121229	0.000101353	3.50612e-05	0	3.54785e-05	0	0	3.95262e-05	0	0	2	0	0	1	0	0	0	0	2	0	2	0	1	4	3	1	0	1	0
IPI00303335,	LOC100134308 similar to nebulin; NEB Nebulin	6669	0.102564	9.50676	61	0	6.72674e-05	0	0	0	0	0	0	0	0	0	0	0	0	0	0	6.97571e-06	4.82624e-06	7.91073e-06	0	0	0	0	0	21	0	0	0	0	0	0	0	0	0	0	0	0	0	0	3	2	3	0	0
IPI00304814,IPI00745335,IPI00884192,	GPX4 Isoform Mitochondrial of Phospholipid hydroperoxide glutathione peroxidase, mitochondrial	200.333	0.324949	9.00993	5	0	0.000426533	0.00047647	0	0	0	0	0	0	0.000542922	0.000382629	0	0	0	0	0	0	0.000321326	0.000438907	0.000487726	0	0	0.000452809	0	4	4	0	0	0	0	0	0	7	5	0	0	0	0	0	0	4	5	6	0
IPI00304840,	COL6A2 Isoform 2C2 of Collagen alpha-2(VI) chain	1019	0.200196	6.12536	15	0	0	0	0	0	0	0	0	0.000160018	0	0	0.000461038	0	0	0	0	0	0	0	0	0.000168156	0	0.000462911	0	0	0	0	0	0	0	0	10	0	0	30	0	0	0	0	0	0	0	0	10
IPI00304962,IPI00873137,	COL1A2 Collagen alpha-2(I) chain	1366.5	0.0409806	9.26686	5	0	0	0	0	0	0	0	0	0	0	0	4.58395e-05	0	0	0	0	0	0	0	0	0	3.86154e-05	0.000106213	0	0	0	0	0	0	0	0	0	0	0	4	0	0	0	0	0	0	0	0	0
IPI00305622,	TGM1 Protein-glutamine gamma-glutamyltransferase K	817	0.0832313	5.91576	5	0	0	0	0	0	0	0	0	0	0	0	0	0	0	0	0	0	0.000118187	0	0	0	0	0	0	0	0	0	0	0	0	0	0	0	0	0	0	0	0	0	0	6	0	0	0
IPI00306322,IPI00477950,IPI00873146,	COL4A2 Collagen alpha-2(IV) chain	1710	0.0309942	8.96	4	0	0	0.000111641	6.70012e-05	0	0	0	0	7.62848e-05	0	0	0.000173999	0	2.5026e-05	0	0	0	0	0	0	8.01641e-05	0	0.000212193	0	0	8	5	0	0	0	0	8	0	0	19	0	3	0	0	0	0	0	0	8
IPI00307409,	MRPL9 39S ribosomal protein L9, mitochondrial	267	0.108614	10.7638	2	0	0	0	0	0	0	0	0	0	0	0	0	0	0	0	0	0	0.000120548	0.00019759	0	0	0	0	0	0	0	0	0	0	0	0	0	0	0	0	0	0	0	0	0	2	3	0	0
IPI00307749,	NDUFS7 NADH dehydrogenase [ubiquinone] iron-sulfur protein 7, mitochondrial	298	0.14094	11.1021	5	0	0	0	0	0	0	8.26193e-05	0	0	0	0	0	0	0	0	0	0	0	0	0	0	0	0	0	0	0	0	0	0	1	0	0	0	0	0	0	0	0	0	0	0	0	0	0
IPI00329301,	NDUFA11 Isoform 1 of NADH dehydrogenase [ubiquinone] 1 alpha subcomplex subunit 11	141	0.326241	8.89457	4	0.000143814	0	0	0	0	0	0	0	0	0.000220396	0.000108728	0	0	0	0	0.000394639	0	0.000114135	0.00024944	0.000115494	0.000121525	0	0	1	0	0	0	0	0	0	0	0	2	1	0	0	0	0	4	0	1	2	1	1
IPI00329321,IPI00873110,	LYRM7 LYR motif-containing protein 7	104	0.163462	10.4053	2	0	0	0	0	0	0	0	0	0	0	0	0	0	0	0	0.000535039	0	0	0	0	0	0	0	0	0	0	0	0	0	0	0	0	0	0	0	0	0	0	4	0	0	0	0	0
IPI00329552,IPI00640673,IPI00827858,	MOSC2 Isoform 1 of MOSC domain-containing protein 2, mitochondrial	254.667	0.0888305	9.21124	2	0	0	0	0	0	0	0	0	0	0	0	0	0	0	0	0	0	0.000189578	0	0	0.000201853	0	0	0	0	0	0	0	0	0	0	0	0	0	0	0	0	0	0	0	3	0	0	3
IPI00329625,	TBRG4 cDNA FLJ56153, highly similar to Homo sapiens transforming growth factor beta regulator 4 (TBRG4), transcript variant 1, mRNA	642	0.221184	7.31411	9	0	0	0	0	0	0	0	0	0	0	0	0	0	0	0	8.6673e-05	0	5.01342e-05	2.73918e-05	2.53654e-05	2.66901e-05	0	2.82594e-05	0	0	0	0	0	0	0	0	0	0	0	0	0	0	0	4	0	2	1	1	1
IPI00329696,	FAM82B Regulator of microtubule dynamics protein 1	314	0.22293	8.73112	6	0	0	0	0	0	0	0	0	0	0	0	0	0	0	0	0	0	5.12519e-05	0	0	0	0	0	0	0	0	0	0	0	0	0	0	0	0	0	0	0	0	0	0	1	0	0	0
IPI00329742,	FAHD2A Fumarylacetoacetate hydrolase domain-containing protein 2A; FAHD2B Fumarylacetoacetate hydrolase domain-containing protein 2B	314	0.130573	8.37979	3	0	0	0	0	7.24372e-05	0	0	0	0	0	0	0	0	0	0	0	0	5.12519e-05	0	5.18618e-05	0	0	5.77788e-05	0	0	0	0	1	0	0	0	0	0	0	0	0	0	0	0	0	1	0	1	0
IPI00329801,IPI00872379,	ANXA5 Annexin A5	319.5	0.131456	4.66004	3	0	0	0	0	0	0	0	0	0	0	0	0	0	0	0	0	0	0	0	0	0	0	0.000170353	0	0	0	0	0	0	0	0	0	0	0	0	0	0	0	0	0	0	0	0	0
IPI00332106,IPI00645060,	PBXIP1 Isoform 1 of Pre-B-cell leukemia transcription factor-interacting protein 1; PBXIP1 Isoform 3 of Pre-B-cell leukemia transcription factor-interacting protein 1	716.5	0.167549	5.04322	9	0.000113205	2.98146e-05	0	0	0	0	0	0	0	0	0	2.18561e-05	0	0	0	0	2.16427e-05	0	0	0	0	0	0	4	1	0	0	0	0	0	0	0	0	0	1	0	0	0	0	1	0	0	0	0
IPI00332828,IPI00419920,	CES2 carboxylesterase 2 isoform 1	615	0.0325258	6.5099	2	0	0	0	0	0	0	0	0	0	0	0	0	0	0	0	0	0	0	5.71888e-05	0	0	0	0	0	0	0	0	0	0	0	0	0	0	0	0	0	0	0	0	0	0	2	0	0
IPI00333619,IPI00394758,	ALDH3A2 Isoform 1 of Fatty aldehyde dehydrogenase	496.5	0.0584402	8.64006	2	8.16828e-05	0	0.000144188	0	0	0	0	0	0	0	0	0.000189244	0	8.61923e-05	9.11004e-05	0	9.36979e-05	6.48261e-05	0	6.55977e-05	0	0	0	2	0	3	0	0	0	0	0	0	0	0	6	0	3	3	0	3	2	0	2	0
IPI00333763,	GLRX5 Glutaredoxin-related protein 5	157	0.159236	6.78403	2	0	0	0	0	0	0	0	0	0	0	0	0	0	0	0	0.000443026	0	0	0	0.000207447	0	0	0.000231115	0	0	0	0	0	0	0	0	0	0	0	0	0	0	0	5	0	0	0	2	0
IPI00334190,IPI00908723,	STOML2 Stomatin-like protein 2	333.5	0.0933786	8.12334	2	0	0	0	0	0	0	0	0	0	0	0	0	0.000177319	0	0	0.000125137	0	0.000241276	0.000158191	0	0	0.000158225	0.000163201	0	0	0	0	0	0	0	0	0	0	0	0	4	0	0	3	0	5	3	0	0
IPI00335168,IPI00413922,IPI00789605,IPI00795576,IPI00796366,	MYL6; MYL6B Isoform Non-muscle of Myosin light polypeptide 6	150.6	0.341941	4.4604	4	0	0	0	0	0	0	0	0	0	0	0	0	0	0	0	0	0	0	0	0	0	0	0.00746904	0	0	0	0	0	0	0	0	0	0	0	0	0	0	0	0	0	0	0	0	0
IPI00337454,IPI00337455,IPI00477427,IPI00641544,IPI00658138,IPI00747742,IPI00852975,IPI00853392,IPI00872734,	TNNT3 29 kDa protein; TNNT3 Putative uncharacterized protein TNNT3	252.889	0.300938	8.24238	9	0	0	0	0	0	0	0	0	0	0	0	0	0	0	0	5.50084e-05	0	0	0	0.000128789	0	0	0	0	0	0	0	0	0	0	0	0	0	0	0	0	0	0	1	0	0	0	2	0
IPI00375677,IPI00903193,	MRPL21 Mitochondrial ribosomal protein L21 isoform d	164.5	0.190211	10.6706	3	0	0	0	0	0	0	0	0	0	0	0	0	0	0	0	0	0	0	0.000320709	0.000197989	0	0	0	0	0	0	0	0	0	0	0	0	0	0	0	0	0	0	0	0	0	3	2	0
IPI00376195,	ISCA2 Iron-sulfur cluster assembly 2 homolog, mitochondrial	154	0.155844	4.87832	2	0	0	0	0	0	0	0	0	0	0	0	0	0	0	0	0.000270994	0	0	0	0	0	0	0	0	0	0	0	0	0	0	0	0	0	0	0	0	0	0	3	0	0	0	0	0
IPI00376379,	KRT77 keratin 77	578	0.105536	5.78374	6	0	0	0	0	0	0	0	0	0	0	0	0	0	0	0	0	0	0.000250584	0	0	0	0	0	0	0	0	0	0	0	0	0	0	0	0	0	0	0	0	0	0	9	0	0	0
IPI00377027,IPI00377028,IPI00472555,IPI00479961,IPI00872517,	BCO2 Isoform 3 of Beta,beta-carotene 9',10'-oxygenase	553.8	0.126476	8.19222	4	0	0	0	0	0	0	0	0	0	0	2.76827e-05	0	0	0	0	2.51192e-05	0	0	0	5.88105e-05	0	0	3.27601e-05	0	0	0	0	0	0	0	0	0	0	1	0	0	0	0	1	0	0	0	2	0
IPI00377214,IPI00465264,	NLRX1 Isoform 2 of NLR family member X1	948	0.0232256	7.62252	2	0	0	0	0	0	0	0	0	0	0	0	0	0	0	0	2.93481e-05	0	0	0	0	0	0	0	0	0	0	0	0	0	0	0	0	0	0	0	0	0	0	2	0	0	0	0	0
IPI00383680,IPI00844076,	RPN2 Ribophorin II, isoform CRA_d; RPN2 ribophorin II isoform 2 precursor	623	0.255259	5.71974	11	3.25486e-05	0	3.83037e-05	0	0	0	0	0	0	0	0	0.000100545	4.74607e-05	9.1588e-05	0	0	2.48909e-05	0	0	0	0	0	0	1	0	1	0	0	0	0	0	0	0	0	4	2	4	0	0	1	0	0	0	0
IPI00384517,	NUBPL Isoform 1 of Nucleotide-binding protein-like	319	0.144201	9.47514	3	0	0	0	0	0	0	0	0	0	0	9.61171e-05	0	9.26897e-05	0	0	0	0	0	0	0	0.00010743	0.000165417	0	0	0	0	0	0	0	0	0	0	0	2	0	2	0	0	0	0	0	0	0	2
IPI00394740,IPI00853443,	TNNT3 Putative uncharacterized protein TNNT3	245.5	0.0285332	9.7776	1	0	0	0	0	0	0	0	0	0	0	0	0	6.022e-05	0	0.000122828	0	6.3165e-05	0	0	0	0	0	0	0	0	0	0	0	0	0	0	0	0	0	0	1	0	2	0	1	0	0	0	0
IPI00396258,	BCAT2 Branched-chain-amino-acid aminotransferase; BCAT2 Isoform A of Branched-chain-amino-acid aminotransferase, mitochondrial	392	0.221939	8.81911	6	0	0	0	0	0	0	0	0	0	0	0	0	0	0	3.84621e-05	0	0	0	0	0	0	0	0	0	0	0	0	0	0	0	0	0	0	0	0	0	0	1	0	0	0	0	0	0
IPI00397801,	FLG2 Filaggrin-2	2391	0.0175659	8.34675	3	0	0	0	0	0	0	0	0	0	0	0	0	0	0	0	0	0	6.73069e-05	0	4.08648e-05	0	0	0	0	0	0	0	0	0	0	0	0	0	0	0	0	0	0	0	0	10	0	6	0
IPI00411680,	PCMT1 Isoform 2 of Protein-L-isoaspartate(D-aspartate) O-methyltransferase; PCMT1 protein-L-isoaspartate (D-aspartate) O-methyltransferase	285	0.466667	7.60712	9	0	0	0	0	0	0	0	0	0	0	0	0	0	0	0	0	0	5.6467e-05	0	0	0	6.17169e-05	0	0	0	0	0	0	0	0	0	0	0	0	0	0	0	0	0	0	1	0	0	0
IPI00412785,IPI00478862,	BRP44L Brain protein 44-like protein	109	0.146789	10.1601	3	0	0	0	0	0	0	0	0	0	0	0	0	0	0	0	0.000893368	0	0.000295286	0	0.000597601	0	0	0	0	0	0	0	0	0	0	0	0	0	0	0	0	0	0	7	0	2	0	4	0
IPI00414410,	MRPL22 Isoform 1 of 39S ribosomal protein L22, mitochondrial	206	0.315534	10.48	5	0	0	0	0	0	0	0	0	0	7.54267e-05	0	0	0	0	0	0.000135058	0	0	8.53668e-05	7.90515e-05	0	0.000256155	8.80706e-05	0	0	0	0	0	0	0	0	0	1	0	0	0	0	0	2	0	0	1	1	0
IPI00418169,IPI00455315,	ANXA2 annexin A2 isoform 1; ANXA2P2 Putative annexin A2-like protein	348	0.419821	8.25048	13	0	0	0	0	0	0	0	0	0	0	0	0	0	0	0	0	0	0.000138733	0	0	0	0	0.000156401	0	0	0	0	0	0	0	0	0	0	0	0	0	0	0	0	0	3	0	0	0
IPI00419237,IPI00789806,	LAP3 Isoform 1 of Cytosol aminopeptidase	503.5	0.135183	7.38586	5	0	0	0	0	0	0	0	0	0	0	0	0	0	0	0	0	0	0.00012785	6.98532e-05	6.46857e-05	0.000102096	0	0	0	0	0	0	0	0	0	0	0	0	0	0	0	0	0	0	0	4	2	2	3
IPI00419585,	PPIA Peptidyl-prolyl cis-trans isomerase A	165	0.351515	7.96846	7	0.000122895	0	0	0	0	0	0.000149215	0	0	0	0	0	0	0	0	0	0	0	0	0	0	0	0	1	0	0	0	0	0	1	0	0	0	0	0	0	0	0	0	0	0	0	0	0
IPI00419942,	TPSB2; TPSAB1 TPSB2 protein	282	0.134752	7.32497	2	0	0	0	0	0	0	0	0	0.000115645	0	0	0	0	0	0	0	0	0	0	0	0	0	0	0	0	0	0	0	0	0	0	2	0	0	0	0	0	0	0	0	0	0	0	0
IPI00428288,	MRPL43 MRPL43 protein (Fragment); MRPL43 mitochondrial ribosomal protein L43 isoform d	159	0.295598	10.3409	5	0	0	0	0	0	0	0	0	0	0	0	0	0	0	0	0	0	0.000101214	0.000110601	0.000102419	0	0.000221249	0.000114104	0	0	0	0	0	0	0	0	0	0	0	0	0	0	0	0	0	1	1	1	0
IPI00442344,	SLC27A1 Long-chain fatty acid transport protein 1	646	0.0727554	8.63219	3	0	0	0	0	0	0	0	0	0	0	0	0	0	0	0	8.61363e-05	0	0	0	0	0	0	0	0	0	0	0	0	0	0	0	0	0	0	0	0	0	0	4	0	0	0	0	0
IPI00450768,	KRT17 Keratin, type I cytoskeletal 17	432	0.31713	4.67479	11	0	0	0	0	0	0	0	0	0	0.000107902	0	0	0	0	0	0	0	0.000782303	0	0	0	0	0	0	0	0	0	0	0	0	0	0	3	0	0	0	0	0	0	0	21	0	0	0
IPI00453474,IPI00473081,	TNNI1 Troponin I, slow skeletal muscle	186.5	0.112601	10.3377	2	0	0	0	0	0	0	0	0	0	0	0	0	0	0	0.00032337	0	0	0	0	0	0	0	0	0	0	0	0	0	0	0	0	0	0	0	0	0	0	4	0	0	0	0	0	0
IPI00464968,	MT-CO1 Cytochrome c oxidase subunit 1	516	0.0600775	6.80017	2	0	0	0	0	0	0	0	0	0	0	0	0	0	0	0	0	0	0	0	0.000157797	0	0	0	0	0	0	0	0	0	0	0	0	0	0	0	0	0	0	0	0	0	0	5	0
IPI00465294,	CDC5L Cell division cycle 5-like protein	802	0.0199501	8.47122	2	0	0	0	0	0	0	0	0	0	0	0	0	0	0	0	3.46908e-05	0	0	0	0	0	0	0	0	0	0	0	0	0	0	0	0	0	0	0	0	0	0	2	0	0	0	0	0
IPI00465439,	ALDOA Fructose-bisphosphate aldolase A	364	0.148352	8.19917	4	0	0	6.55582e-05	0	0	0	0	0	0	0	0	0	0	0	0	0	4.26017e-05	0	0	0	4.70744e-05	4.83223e-05	4.98421e-05	0	0	1	0	0	0	0	0	0	0	0	0	0	0	0	0	1	0	0	0	1
IPI00470359,	TNNC1 Troponin C, slow skeletal and cardiac muscles	161	0.310559	3.78125	5	0	0	0	0	0	0	0	0	0	0	0	0	0	0	0.00149835	0.000345615	0	0	0	0	0	0.000327751	0.00033806	0	0	0	0	0	0	0	0	0	0	0	0	0	0	16	4	0	0	0	0	0
IPI00470535,	CACNA2D1 Dihydropyridine receptor alpha 2 subunit	1110	0.25946	4.98541	21	0	0	0.000300977	0	6.14738e-05	0	0	0	7.34499e-05	0	0.000110491	0.000197513	0	0.000115661	0	1.25324e-05	0	0	0	1.46708e-05	1.5437e-05	0	1.63446e-05	0	0	14	0	3	0	0	0	5	0	8	14	0	9	0	1	0	0	0	1	1
IPI00472073,IPI00472282,IPI00472284,IPI00472434,IPI00472767,IPI00646083,IPI00744375,	HLA-B HLA class I histocompatibility antigen, B-59 alpha chain	362	0.138122	6.2154	3	0	0	0	0	0	0	0	0	0	0.000171689	0	0	0	0	0	0	0	0	0	0	0	0	0	0	0	0	0	0	0	0	0	0	4	0	0	0	0	0	0	0	0	0	0	0
IPI00472939,	LOC653566 Similar to Signal peptidase complex subunit 2; SPCS2 Signal peptidase complex subunit 2	227	0.132159	8.68228	2	0	0	0	0	0	0	0	0	0	0	0	0	0	0	0	0	0	0	0	0	0	0	0	0	0	0	0	0	0	0	0	0	0	0	0	0	0	0	0	0	0	0	0	0
IPI00477957,	CLYBL Isoform 1 of Citrate lyase subunit beta-like protein, mitochondrial	340	0.267647	9.11615	5	0	0	0	0	0	0	0	0	0	0	0	0	0	0	0	8.18295e-05	0	0	0	0	0	0	0.000160081	0	0	0	0	0	0	0	0	0	0	0	0	0	0	0	2	0	0	0	0	0
IPI00478657,IPI00914953,IPI00922919,	GRSF1 Isoform 1 of G-rich sequence factor 1	415.333	0.0820614	5.93912	2	0	0	0	0	0	0	0	0	0	0	0	0	0	0	0	0	0	0	0	0	0	0	8.73637e-05	0	0	0	0	0	0	0	0	0	0	0	0	0	0	0	0	0	0	0	0	0
IPI00478921,IPI00844448,	MPZ myelin protein zero	254.5	0.161131	10.1046	4	0	0	0	0	0	0	0	0	0.000256281	0	0.00102405	0.000615321	0	0	0	0	0	0	0	0	0	0	0	0	0	0	0	0	0	0	0	4	0	17	10	0	0	0	0	0	0	0	0	0
IPI00514506,	MRPL24 39S ribosomal protein L24, mitochondrial	216	0.101852	9.71771	2	0	0	0	0	0	0	0	0	0	0	0	0	0	0	0	0	0	0	0	0	0	0	0.000167986	0	0	0	0	0	0	0	0	0	0	0	0	0	0	0	0	0	0	0	0	0
IPI00549381,	MRPL1 mitochondrial ribosomal protein L1 precursor	325	0.132308	9.17831	3	0	0	0	0	0	0	0	0	0	0	0	0	0	0	0.000139173	0.000128409	0	0.000148552	0	0	0	0.000162363	0.00016747	0	0	0	0	0	0	0	0	0	0	0	0	0	0	3	3	0	3	0	0	0
IPI00550037,IPI00555996,	MRPS15 28S ribosomal protein S15, mitochondrial	200	0.157819	10.8144	3	0	0	0	0	0	0	0	0	0	0	0	0	0	0	0	0	0	0	0.000263783	0	0	0	0	0	0	0	0	0	0	0	0	0	0	0	0	0	0	0	0	0	0	3	0	0
IPI00550239,	H1F0 Histone H1.0	194	0.118557	11.605	2	0	0	0	0	0	0	0	0	0	0	0	0	0	0	0.000388586	0	0.000399665	0	0	0	0	0	0	0	0	0	0	0	0	0	0	0	0	0	0	0	0	5	0	5	0	0	0	0
IPI00550731,IPI00784865,IPI00784985,IPI00853045,IPI00889156,IPI00909649,	- Putative uncharacterized protein	254.833	0.208458	7.06314	3	0	0	0	0	0	0	0	0	0	0	0	0	0	0	0	0	0	0	0	0	0	0	0.000213581	0	0	0	0	0	0	0	0	0	0	0	0	0	0	0	0	0	0	0	0	0
IPI00552360,	FAHD1 Isoform 1 of Fumarylacetoacetate hydrolase domain-containing protein 1; FAHD1 Isoform 2 of Fumarylacetoacetate hydrolase domain-containing protein 1	224	0.473214	7.45678	6	0	0	0	0	0	0	0	0	0	0	6.84405e-05	0	6.6e-05	6.36823e-05	0	6.21027e-05	0	0	0	0	0	0	0.00024298	0	0	0	0	0	0	0	0	0	0	1	0	1	1	0	1	0	0	0	0	0
IPI00554469,	IMMT Isoform 1 of Mitochondrial inner membrane protein; IMMT Isoform 2 of Mitochondrial inner membrane protein	747	0.668005	6.52856	48	0	0	0	0	0	6.43531e-05	0	6.06347e-05	0	6.24012e-05	4.1046e-05	0	0	0	0	0.000130358	0	8.61745e-05	0	0.000109	4.5877e-05	0	2.42872e-05	0	0	0	0	0	2	0	2	0	3	2	0	0	0	0	7	0	4	0	5	2
IPI00554538,IPI00554617,IPI00909516,	TPP1 Putative uncharacterized protein TPP1; TPP1 cDNA FLJ56402, highly similar to Tripeptidyl-peptidase 1	478.667	0.168937	5.96281	5	0	0	0	0	0	0	0	0	0	0	0	3.27157e-05	0	0	0	2.9062e-05	0	0	3.67386e-05	0	0	0	0	0	0	0	0	0	0	0	0	0	0	0	1	0	0	0	1	0	0	1	0	0
IPI00554711,	JUP Junction plakoglobin	745	0.0510067	6.0482	2	0	0	0	0	0	0	0	0	0	0	0	0	0	0	0	0	0	4.32029e-05	0	0	0	0	0	0	0	0	0	0	0	0	0	0	0	0	0	0	0	0	0	0	2	0	0	0
IPI00604590,IPI00795292,	NME1; NME1 Isoform 1 of Nucleoside diphosphate kinase A; NME2; NME1 Isoform 1 of Nucleoside diphosphate kinase B; NME2 Nucleoside diphosphate kinase	279.5	0.243779	9.02433	6	7.25501e-05	0	8.53782e-05	0	0	0	0	0	5.83394e-05	0	0	5.60283e-05	0	0	0	0	0	0	0	0	6.13061e-05	0	0	1	0	1	0	0	0	0	0	1	0	0	1	0	0	0	0	0	0	0	0	1
IPI00642329,	MFN2 Isoform 1 of Mitofusin-2	757	0.0303831	6.97138	2	0	0	0	0	0	0	0	0	0	0	0	0	0	0	0	5.51295e-05	0	0	4.64612e-05	0	0	0	0	0	0	0	0	0	0	0	0	0	0	0	0	0	0	0	3	0	0	2	0	0
IPI00645518,IPI00647250,IPI00902843,IPI00910287,	CDIPT Isoform 1 of CDP-diacylglycerol--inositol 3-phosphatidyltransferase	200.75	0.111496	8.28059	2	0	0	0	0	0	0	0	0	0	0	0.000152734	0	0	0	0	0	0	0	0	0	0	0	0	0	0	0	0	0	0	0	0	0	0	2	0	0	0	0	0	0	0	0	0	0
IPI00744772,IPI00925656,	MRPS17 28S ribosomal protein S17, mitochondrial	177.5	0.175983	8.22021	3	0	0	0	0	0	0	0	0	9.18641e-05	0	8.637e-05	0	0	0	0	0	0	0	0	0	0	0	0	0	0	0	0	0	0	0	0	1	0	1	0	0	0	0	0	0	0	0	0	0
IPI00747159,	ACAD8 Isobutyryl-CoA dehydrogenase, mitochondrial	415	0.127711	7.90691	5	0	0	0.000287508	0	0	0	0	0	0	0	0	0	0	0	0	0	0	0	0	0.0001962	0	0	0	0	0	5	0	0	0	0	0	0	0	0	0	0	0	0	0	0	0	0	5	0
IPI00747200,IPI00915263,	C6orf203 Uncharacterized protein C6orf203	242.5	0.127849	9.83571	2	0	0	0	0	0	0	0	0	0.000268963	0	0	0	0	0	0	0	0	0	0	0	0	0.000145066	0	0	0	0	0	0	0	0	0	4	0	0	0	0	0	0	0	0	0	0	0	0
IPI00760602,	LYRM5 LYR motif containing 5	90	0.222222	10.4908	2	0	0	0	0	0	0	0	0	0	0	0	0	0	0	0	0.000618267	0	0	0	0	0	0	0	0	0	0	0	0	0	0	0	0	0	0	0	0	0	0	4	0	0	0	0	0
IPI00760877,IPI00893272,IPI00893280,IPI00893915,	BDP1 Isoform 1 of Transcription factor TFIIIB component B'' homolog	2508.5	0.00600235	4.77892	2	0	0	0	0	0	0	0	0	0	0	0	0	0	0	0	0	0	0	0	0	1.36616e-05	0	0	0	0	0	0	0	0	0	0	0	0	0	0	0	0	0	0	0	0	0	0	2
IPI00787265,	LOC729034 similar to puromycin sensitive aminopeptidase	486	0.0390947	5.15593	2	0	0	0	0	0	0	0	0	0	0	0	0	0	0	0	0	0	0	0	0	0	7.2384e-05	0	0	0	0	0	0	0	0	0	0	0	0	0	0	0	0	0	0	0	0	0	0
IPI00788907,	PGAM5 Isoform 1 of Phosphoglycerate mutase family member 5; PGAM5 Isoform 2 of Phosphoglycerate mutase family member 5	289	0.148789	8.88757	4	0.00014033	0	0.000247715	0	0.00023611	0	0	0	0	0	0.000106095	0	0	0	0.00015651	0	0	0	0.000182549	0	0	0.000121725	0	2	0	3	0	3	0	0	0	0	0	2	0	0	0	3	0	0	0	3	0	0
IPI00789008,IPI00795979,IPI00872619,	FLOT2 flotillin 2	432	0.0723772	4.9344	2	0	0	0	0	0	0	0	0	0	0	0	0.00010875	0	0	0	0	0	0	0	0	0	0	0	0	0	0	0	0	0	0	0	0	0	0	3	0	0	0	0	0	0	0	0	0
IPI00790373,	ALAD Delta-aminolevulinic acid dehydratase	339	0.20059	6.83586	5	0	0	0	0	0	0	0	0	0	0	0	0	0	0	0	0	0	0	0	0	0.000303276	0	0	0	0	0	0	0	0	0	0	0	0	0	0	0	0	0	0	0	0	0	0	6
IPI00792890,	UQCRC1 cDNA FLJ52292, highly similar to Ubiquinol-cytochrome-c reductase complex coreprotein I, mitochondrial	222	0.0495495	5.74454	2	0	0	0	0	0	0	0	0	0	0	0	0	0	0	0	0	0	0	0	0	0.00015437	0.000237693	0	0	0	0	0	0	0	0	0	0	0	0	0	0	0	0	0	0	0	0	0	2
IPI00794080,	- 227 kDa protein	1968	0.0193089	5.55653	4	0	0	0	0	0	0	0	0	0	0	0	0	0	0	0	0.000106029	0	0	0	0	0	0	0	0	0	0	0	0	0	0	0	0	0	0	0	0	0	0	15	0	0	0	0	0
IPI00796633,	TPI1 22 kDa protein; TPI1 triosephosphate isomerase 1 isoform 2	210	0.323809	8.3093	4	0	0	0	0	0	0	0	0	0	0	0	0	0	0	0	0	0	0	0	0	0	0	8.6393e-05	0	0	0	0	0	0	0	0	0	0	0	0	0	0	0	0	0	0	0	0	0
IPI00844050,IPI00872061,	UQCC Isoform 1 of Ubiquinol-cytochrome c reductase complex chaperone CBP3 homolog; UQCC Isoform 4 of Ubiquinol-cytochrome c reductase complex chaperone CBP3 homolog; UQCC Ubiquinol-cytochrome c reductase complex chaperone, CBP3 homolog	298.5	0.137354	9.16058	4	0	0	0	0	0	0	0	0	0	0	0	0	0	0	0	0	0	0	0	0	0	0	0	0	0	0	0	0	0	0	0	0	0	0	0	0	0	0	0	0	0	0	0	0
IPI00844276,	LAMA2 Laminin subunit alpha-2; LAMA2 laminin alpha 2 subunit isoform b precursor	3122	0.112428	6.36303	25	0	0	0	0	0	0	0	0	0	0	0	0	0	0	0	0	0	0	0	0	0	0	0.000261504	0	0	0	0	0	0	0	0	0	0	0	0	0	0	0	0	0	0	0	0	0
IPI00872610,	CHCHD2 19 kDa protein; CHCHD2 Coiled-coil-helix-coiled-coil-helix domain-containing protein 2, mitochondrial	179	0.195531	11.8485	3	0	0	0	0	0	0	0	0	0	0	0	0	0	7.96918e-05	0	0	0	0	0	0	0	0	0	0	0	0	0	0	0	0	0	0	0	0	0	0	1	0	0	0	0	0	0	0
IPI00873771,	TRDN Putative uncharacterized protein TRDN (Fragment)	731	0.0314637	10.083	2	0	0	0	0	0	0	0	0	0	0	0	0	0	0	0	0	0	2.20152e-05	0	0	0	0	2.48188e-05	0	0	0	0	0	0	0	0	0	0	0	0	0	0	0	0	0	1	0	0	0
IPI00879322,	SDHA SDHA protein	519	0.0250482	7.5461	2	0	0	0	0	0.000569728	0	0	0.000479996	0	0	0	0	0	0	0	0.000268035	0	0	0	0	0.000198093	0.000169454	0	0	0	0	0	13	0	0	11	0	0	0	0	0	0	0	10	0	0	0	0	6
IPI00909949,	- Enolase	406	0.0591133	7.82245	2	0	0	0	0	0	0	0	0	0	0	0	0	0	0	0	0	0	0	4.33142e-05	0	0	0	0	0	0	0	0	0	0	0	0	0	0	0	0	0	0	0	0	0	0	1	0	0
IPI00927892,	PMPCB Mitochondrial-processing peptidase subunit beta; PMPCB cDNA FLJ78497	489	0.159509	6.82133	5	0	0	0	0	0	0	0	0	3.33453e-05	0	3.13511e-05	0	0	0	3.08326e-05	2.84479e-05	0	0	0	0	0	0	0	0	0	0	0	0	0	0	0	1	0	1	0	0	0	1	1	0	0	0	0	0
[truncated: 2 more columns]
